# Supplementary material for: Genome-scale metabolic reconstructions and theoretical investigation of methane conversion in Methylomicrobium buryatense strain 5G(B1)
Source: Microb Cell Fact. 2015 Nov 25;14:188. doi: 10.1186/s12934-015-0377-3 (PMC4658805; doi:10.1186/s12934-015-0377-3)
Supplement: Supplementary file 1 — 10.1186/s12934-015-0377-3 List of iMb5G(B1) model enzymatic reactions. [file 12934_2015_377_MOESM1_ESM.xlsx]

## Sheet: Sheet1
Additional File 1. List of iMb5G(B1) model enzymatic reactions
Rxn description	Formula	Genes	Subsystem	Reversible	LB	UB	Objective	Confidence Score	EC Number
RXN-9516	Butanoyl-ACPs[c] + MALONYL-ACP[c] + PROTON[c] -> 3-oxo-hexanoyl-ACPs[c] + CARBON-DIOXIDE[c] + ACP[c]	METBUDRAFT_0901 METBUDRAFT_1201 METBUDRAFT_2783	PWY-5971	0	0	1000	0	Confidence level: 2	2.3.1.41
RXN-10656	3-hydroxy-cis-D7-tetraecenoyl-ACPs[c] <=> Trans-D3-cis-D7-tetradecenoyl-ACPs[c] + WATER[c]	METBUDRAFT_1202		1	-1000	1000	0	Confidence level: 2	4.2.1.59
ENOYL-ACP-REDUCT-NADH-RXN	TRANS-D2-ENOYL-ACP[c] + NADH[c] + PROTON[c] -> Saturated-Fatty-Acyl-ACPs[c] + NAD[c]	METBUDRAFT_0122	PWY-7096	0	0	1000	0	Confidence level: 2	1.3.1.9
RXN1G-72	cis-delta5-3-hydroxylignoceroyl-ACPs[c] + NADP[c] <=> cis-delta5-3-oxo-lignoceroyl-ACPs[c] + NADPH[c] + PROTON[c]	METBUDRAFT_1059 METBUDRAFT_2781 METBUDRAFT_2972		1	-1000	1000	0	Confidence level: 2	1.1.1.100
RXN1G-287	cis-delta21-3-hydroxyC40-ACPs[c] + NADP[c] <=> cis-delta21-3-oxo-C40-ACPs[c] + NADPH[c] + PROTON[c]			1	-1000	1000	0	Confidence level: 0	1.1.1.100
RXN0-2142	b-Hydroxy-cis-D5-dodecenoyl-ACPs[c] + NADP[c] <=> b-Keto-cis-D5-dodecenoyl-ACPs[c] + NADPH[c] + PROTON[c]	METBUDRAFT_1059 METBUDRAFT_2781 METBUDRAFT_2972		1	-1000	1000	0	Confidence level: 2	1.1.1.100
RXN-9653	Dodecanoyl-ACPs[c] + MALONYL-COA[c] + PROTON[c] <=> 3-oxo-myristoyl-ACPs[c] + CO-A[c] + CARBON-DIOXIDE[c]	METBUDRAFT_0901 METBUDRAFT_1201 METBUDRAFT_2783		1	-1000	1000	0	Confidence level: 2	2.3.1.41
RXN-9539	Myristoyl-ACPs[c] + MALONYL-ACP[c] + PROTON[c] -> 3-oxo-palmitoyl-ACPs[c] + CARBON-DIOXIDE[c] + ACP[c]	METBUDRAFT_0901 METBUDRAFT_1201 METBUDRAFT_2783	PWY-5971	0	0	1000	0	Confidence level: 2	2.3.1.41
RXN-7716	Oxo-glutarate-dehydrogenase-DH-lipoyl[c] + NAD[c] -> Oxo-glutarate-dehydrogenase-lipoyl[c] + NADH[c] + PROTON[c]		TCA, PWY-5084	0	0	1000	0	Confidence level: 0	1.8.1.4
PYRUFLAVREDUCT-RXN	PYRUVATE[c] + Oxidized-ferredoxins[c] + CO-A[c] <=> ACETYL-COA[c] + Reduced-ferredoxins[c] + PROTON[c] + CARBON-DIOXIDE[c]		PWY-6587	1	-1000	1000	0	Confidence level: 0	1.2.7.1
BIOTIN-CARBOXYL-RXN	BCCP-dimers[c] + HCO3[c] + ATP[c] -> Pi[c] + Carboxybiotin-BCCP[c] + ADP[c] + PROTON[c]	METBUDRAFT_0593	PWY0-1264	0	0	1000	0	Confidence level: 2	6.3.4.14
RXN1G-617	cis-cis-D21-39-3-hydroxyC58-2-ACPs[c] + NADP[c] <=> cis-cis-D21-39-3-oxo-C58-2-ACPs[c] + NADPH[c] + PROTON[c]	METBUDRAFT_1059 METBUDRAFT_2781 METBUDRAFT_2972		1	-1000	1000	0	Confidence level: 2	1.1.1.100
RXN1G-252	cis-cis-D9-21-3-hydroxyC40-2-ACPs[c] + NADP[c] <=> cis-cis-D9-21-3-oxo-C40-2-ACPs[c] + NADPH[c] + PROTON[c]	METBUDRAFT_1059 METBUDRAFT_2781 METBUDRAFT_2972		1	-1000	1000	0	Confidence level: 2	1.1.1.100
RXN0-1133	Pyruvate-dehydrogenase-acetylDHlipoyl[c] + CO-A[c] -> Pyruvate-dehydrogenase-dihydrolipoate[c] + ACETYL-COA[c]	METBUDRAFT_1907	PYRUVDEHYD-PWY	0	0	1000	0	Confidence level: 2	2.3.1.12
RXN-9650	Hexanoyl-ACPs[c] + MALONYL-COA[c] + PROTON[c] <=> 3-Oxo-octanoyl-ACPs[c] + CO-A[c] + CARBON-DIOXIDE[c]	METBUDRAFT_0901 METBUDRAFT_1201 METBUDRAFT_2783		1	-1000	1000	0	Confidence level: 2	2.3.1.41
RXN-9535	Dodecanoyl-ACPs[c] + MALONYL-ACP[c] + PROTON[c] -> 3-oxo-myristoyl-ACPs[c] + CARBON-DIOXIDE[c] + ACP[c]		PWY-5971	0	0	1000	0	Confidence level: 0	2.3.1.41
RXN-13268	STEARIC_ACID[c] + ATP[c] + ACP[c] -> Stearoyl-ACPs[c] + PPI[c] + AMP[c]			0	0	1000	0	Confidence level: 0	6.2.1.20
RXN-9787	ThiI-L-cysteine[c] + CYS[c] <=> ThiI-S-sulfanylcysteine[c] + L-ALPHA-ALANINE[c]	METBUDRAFT_0287 METBUDRAFT_1086 METBUDRAFT_1600 METBUDRAFT_4085		1	-1000	1000	0	Confidence level: 2	2.8.1.7
RXN0-1134	Pyruvate-dehydrogenase-lipoate[c] + PYRUVATE[c] + PROTON[c] -> Pyruvate-dehydrogenase-acetylDHlipoyl[c] + CARBON-DIOXIDE[c]	METBUDRAFT_1906	PYRUVDEHYD-PWY	0	0	1000	0	Confidence level: 2	1.2.4.1
RXN-13667	2 S-ADENOSYLMETHIONINE[c] + CPD-14678[c] -> 2 ADENOSYL-HOMO-CYS[c] + CPD-14681[c] + 2 PROTON[c]		PWY-7104	0	0	1000	0	Confidence level: 0	2.1.1.-
RXN-13163	2-D-THREO-HYDROXY-3-CARBOXY-ISOCAPROATE[c] <=> 3-CARBOXY-3-HYDROXY-ISOCAPROATE[c]	METBUDRAFT_3812 METBUDRAFT_3813		1	-1000	1000	0	Confidence level: 2	4.2.1.33
SUCCINATE-DEHYDROGENASE-UBIQUINONE-RXN	Ubiquinones[c] + SUC[c] <=> Ubiquinols[c] + FUM[c]		TCA	1	-1000	1000	0	Confidence level: 0	1.3.5.1
GLUTAMATESYN-RXN	2 GLT[c] + NADP[c] <=> GLN[c] + 2-KETOGLUTARATE[c] + NADPH[c] + PROTON[c]	METBUDRAFT_2021	GLUTSYN-PWY, GLUTAMINEFUM-PWY	1	-1000	1000	0	Confidence level: 2	1.4.1.13
ISOCITDEH-RXN	THREO-DS-ISO-CITRATE[c] + NADP[c] -> 2-KETOGLUTARATE[c] + NADPH[c] + CARBON-DIOXIDE[c]	METBUDRAFT_3289	TCA	0	0	1000	0	Confidence level: 2	1.1.1.42
CARBPSYN-RXN	GLN[c] + HCO3[c] + 2 ATP[c] + WATER[c] -> CARBAMOYL-P[c] + GLT[c] + Pi[c] + 2 ADP[c] + 2 PROTON[c]	METBUDRAFT_1235 METBUDRAFT_1236	PWY-5686-1, ARGSYNBSUB-PWY	0	0	1000	0	Confidence level: 2	6.3.5.5
RXN-13403	UROPORPHYRINOGEN-III[c] + 2 S-ADENOSYLMETHIONINE[c] <=> DIHYDROSIROHYDROCHLORIN[c] + 2 ADENOSYL-HOMO-CYS[c] + PROTON[c]	METBUDRAFT_0722 METBUDRAFT_1216		1	-1000	1000	0	Confidence level: 2	2.1.1.107
RXN-13179	4-PHOSPHONOOXY-THREONINE[c] + NAD[c] <=> 1-AMINO-PROPAN-2-ONE-3-PHOSPHATE[c] + NADH[c] + CARBON-DIOXIDE[c]	METBUDRAFT_2182		1	-1000	1000	0	Confidence level: 2	1.1.1.262
RXN-13158	2-D-THREO-HYDROXY-3-CARBOXY-ISOCAPROATE[c] + NAD[c] <=> 2K-4CH3-PENTANOATE[c] + NADH[c] + CARBON-DIOXIDE[c]	METBUDRAFT_0717		1	-1000	1000	0	Confidence level: 2	1.1.1.85
1.4.3.19-RXN	OXYGEN-MOLECULE[c] + GLY[c] + WATER[c] -> AMMONIA[c] + HYDROGEN-PEROXIDE[c] + GLYOX[c] + PROTON[c]	METBUDRAFT_2540		0	0	1000	0	Confidence level: 2	1.4.3.19
RXN-8001	HISTIDINOL[c] + 2 NAD[c] + WATER[c] <=> HIS[c] + 2 NADH[c] + 3 PROTON[c]	METBUDRAFT_2500		1	-1000	1000	0	Confidence level: 2	1.1.1.23
RXN-13162	2 FARNESYL-PP[c] + NADH-P-OR-NOP[c] + PROTON[c] -> SQUALENE[c] + NAD-P-OR-NOP[c] + 2 PPI[c]	METBUDRAFT_4507		0	0	1000	0	Confidence level: 2	2.5.1.21
ASNSYNB-RXN	L-ASPARTATE[c] + GLN[c] + ATP[c] + WATER[c] -> ASN[c] + GLT[c] + PPI[c] + AMP[c] + PROTON[c]	METBUDRAFT_0851 METBUDRAFT_1736 METBUDRAFT_1764	ASPARAGINE-BIOSYNTHESIS	0	0	1000	0	Confidence level: 2	6.3.5.4
3.1.3.77-RXN	CPD-8999[c] + WATER[c] <=> CPD-85[c] + Pi[c] + PROTON[c]	METBUDRAFT_1801		1	-1000	1000	0	Confidence level: 2	3.1.3.77
2-DEHYDROPANTOATE-REDUCT-RXN	2-DEHYDROPANTOATE[c] + NADPH[c] + PROTON[c] -> L-PANTOATE[c] + NADP[c]	METBUDRAFT_4059	PANTO-PWY	0	0	1000	0	Confidence level: 2	1.1.1.169
PYRIDOXKIN-RXN	PYRIDOXAL[c] + ATP[c] -> PYRIDOXAL_PHOSPHATE[c] + ADP[c] + PROTON[c]		PLPSAL-PWY	0	0	1000	0	Confidence level: 0	2.7.1.35
UDP-NACMURALGLDAPAALIG-RXN	UDP-AAGM-DIAMINOHEPTANEDIOATE[c] + D-ALA-D-ALA[c] + ATP[c] -> C1[c] + Pi[c] + ADP[c] + PROTON[c]	METBUDRAFT_3619	PWY-6387	0	0	1000	0	Confidence level: 2	6.3.2.10
PORPHOBILSYNTH-RXN	2 5-AMINO-LEVULINATE[c] -> PORPHOBILINOGEN[c] + 2 WATER[c] + PROTON[c]	METBUDRAFT_3923	PWY-5189, PWY-5188	0	0	1000	0	Confidence level: 2	4.2.1.24
PHENYLALANINE--TRNA-LIGASE-RXN	PHE-tRNAs[c] + PHE[c] + ATP[c] + PROTON[c] -> Charged-PHE-tRNAs[c] + PPI[c] + AMP[c]	METBUDRAFT_1649 METBUDRAFT_1650	TRNA-CHARGING-PWY	0	0	1000	0	Confidence level: 2	6.1.1.20
OHMETPYRKIN-RXN	HMP[c] + ATP[c] -> AMINO-HYDROXYMETHYL-METHYL-PYR-P[c] + ADP[c] + PROTON[c]	METBUDRAFT_4239	PWY-6910	0	0	1000	0	Confidence level: 2	2.7.1.49
THI-P-SYN-RXN	THZ-P[c] + AMINO-HYDROXYMETHYL-METHYLPYRIMIDINE-PP[c] + PROTON[c] -> THIAMINE-P[c] + PPI[c]	METBUDRAFT_4238	PWY-6897	0	0	1000	0	Confidence level: 2	2.5.1.3
N-ACETYLTRANSFER-RXN	GLT[c] + ACETYL-COA[c] -> ACETYL-GLU[c] + CO-A[c] + PROTON[c]	METBUDRAFT_1246 METBUDRAFT_3651	ARGSYNBSUB-PWY	0	0	1000	0	Confidence level: 2	2.3.1.1
SPERMIDINESYN-RXN	PUTRESCINE[c] + S-ADENOSYLMETHIONINAMINE[c] -> SPERMIDINE[c] + 5-METHYLTHIOADENOSINE[c] + PROTON[c]	METBUDRAFT_1596 METBUDRAFT_2292 METBUDRAFT_3986 METBUDRAFT_4435	BSUBPOLYAMSYN-PWY	0	0	1000	0	Confidence level: 2	2.5.1.16
LIPIDADISACCHARIDESYNTH-RXN	BISOHMYR-GLUCOSAMINYL-1P[c] + OH-MYRISTOYL[c] -> BISOHMYR-GLC[c] + UDP[c] + PROTON[c]	METBUDRAFT_1547	NAGLIPASYN-PWY	0	0	1000	0	Confidence level: 2	2.4.1.182
RXNN0B-92	NIACINE[c] + 2 OXYGEN-MOLECULE[c] + NADH[c] + 2 WATER[c] -> FORMATE[c] + AMMONIUM[c] + FUM[c] + NAD[c] + 2 PROTON[c] + CARBON-DIOXIDE[c]			0	0	1000	0	Confidence level: 0
IMPCYCLOHYDROLASE-RXN	PHOSPHORIBOSYL-FORMAMIDO-CARBOXAMIDE[c] -> IMP[c] + WATER[c]	METBUDRAFT_0585	PWY-6123	0	0	1000	0	Confidence level: 2	3.5.4.10
RXNN0B-66	2 OXYGEN-MOLECULE[c] + 8 Pi[c] + 8 ADP[c] + 4 NADH[c] + 12 PROTON[c] -> 8 ATP[c] + 4 NAD[c] + 12 WATER[c]			0	0	1000	0	Confidence level: 0
HISTOLDEHYD-RXN	HISTIDINOL[c] + NAD[c] -> HISTIDINAL[c] + NADH[c] + PROTON[c]	METBUDRAFT_2500	HISTSYN-PWY	0	0	1000	0	Confidence level: 2
RXNN0B-19	SUCROSE-6P[c] + WATER[c] -> SUCROSE[c] + Pi[c]		PWYN0B-19	0	0	1000	0	Confidence level: 0	3.1.3.24
GTP-CYCLOHYDRO-I-RXN	GTP[c] + WATER[c] -> DIHYDRONEOPTERIN-P3[c] + FORMATE[c] + PROTON[c]	METBUDRAFT_1048	PWY-6147	0	0	1000	0	Confidence level: 2	3.5.4.16
RXN0-901	XANTHINE[c] + NAD[c] + WATER[c] <=> URATE[c] + NADH[c] + PROTON[c]	METBUDRAFT_0446 METBUDRAFT_0447	SALVADEHYPOX-PWY	1	-1000	1000	0	Confidence level: 2	1.17.1.4
GLYC3PDEHYDROGBIOSYN-RXN	DIHYDROXY-ACETONE-PHOSPHATE[c] + NADPH[c] + PROTON[c] -> GLYCEROL-3P[c] + NADP[c]	METBUDRAFT_2589	PWYN0B-39	0	0	1000	0	Confidence level: 2	1.1.1.94
RXN0-5226	CPD0-1081[c] + WATER[c] <=> N-ACETYL-D-GLUCOSAMINE[c] + CPD0-882[c]	METBUDRAFT_3823		1	-1000	1000	0	Confidence level: 2	3.2.1.52
RXN0-2044	3-HYDROXYADIPYL-COA[c] + NAD[c] <=> 3-KETO-ADIPYL-COA[c] + NADH[c] + PROTON[c]	METBUDRAFT_3643		1	-1000	1000	0	Confidence level: 2	1.1.1.35
FRUCTOKINASE-RXN	BETA-D-FRUCTOSE[c] + ATP[c] <=> FRUCTOSE-6P[c] + ADP[c] + PROTON[c]			1	-1000	1000	0	Confidence level: 0	2.7.1.4
RXN-9237	CPD-9873[c] + S-ADENOSYLMETHIONINE[c] <=> CPD-9958[c] + ADENOSYL-HOMO-CYS[c] + PROTON[c]			1	-1000	1000	0	Confidence level: 0	2.1.1.64
DTMPKI-RXN	TMP[c] + ATP[c] -> TDP[c] + ADP[c]	METBUDRAFT_1064	PWY0-166	0	0	1000	0	Confidence level: 2	2.7.4.9
RXN-8675	CPD-9038[c] + S-ADENOSYLMETHIONINE[c] -> DIHYDROSIROHYDROCHLORIN[c] + ADENOSYL-HOMO-CYS[c]	METBUDRAFT_0722 METBUDRAFT_1216	P381-PWY, PWY-5194	0	0	1000	0	Confidence level: 2
DIHYDLIPOXN-RXN	DIHYDROLIPOAMIDE[c] + NAD[c] <=> LIPOAMIDE[c] + NADH[c] + PROTON[c]	METBUDRAFT_0801 METBUDRAFT_1908		1	-1000	1000	0	Confidence level: 2	1.8.1.4
RXN-7694	CPD-7033[c] + NAD[c] <=> METHYLBUT-CPD[c] + NADH[c] + PROTON[c]	METBUDRAFT_1594 METBUDRAFT_2417		1	-1000	1000	0	Confidence level: 2	1.1.1.1
CYSTATHIONINE-BETA-LYASE-RXN	L-CYSTATHIONINE[c] + WATER[c] -> HOMO-CYS[c] + AMMONIA[c] + PYRUVATE[c] + PROTON[c]		HOMOSER-METSYN-PWY	0	0	1000	0	Confidence level: 0	4.4.1.8
RXN-5183	N2ACETYL-ALPHA-NP[c] + NADPH[c] + PROTON[c] -> N-ACETYL-AAA-SEMIALDEHYDE[c] + Pi[c] + NADP[c]	METBUDRAFT_2579	PWY-3081	0	0	1000	0	Confidence level: 2
CARBODEHYDRAT-RXN	H2CO3[c] <=> WATER[c] + CARBON-DIOXIDE[c]	METBUDRAFT_1296 METBUDRAFT_2595 METBUDRAFT_3742		1	-1000	1000	0	Confidence level: 2	4.2.1.1
RXN-13617	CPD0-2123[c] + CO-A[c] -> CPD-196[c] + ACETYL-COA[c]			0	0	1000	0	Confidence level: 0	2.3.1.16
ARGSUCCINSYN-RXN	L-CITRULLINE[c] + L-ASPARTATE[c] + ATP[c] -> L-ARGININO-SUCCINATE[c] + PPI[c] + AMP[c] + PROTON[c]	METBUDRAFT_0711	ARGSYNBSUB-PWY	0	0	1000	0	Confidence level: 2	6.3.4.5
RXN-12921	CPD-13381[c] + NADPH[c] + PROTON[c] -> CPD-11916[c] + NADP[c]		PWY-6973	0	0	1000	0	Confidence level: 0	1.1.1.-
AIRS-RXN	5-PHOSPHORIBOSYL-N-FORMYLGLYCINEAMIDINE[c] + ATP[c] -> 5-PHOSPHORIBOSYL-5-AMINOIMIDAZOLE[c] + Pi[c] + ADP[c] + PROTON[c]	METBUDRAFT_3975	PWY-6121	0	0	1000	0	Confidence level: 2	6.3.3.1
RXN-12610	CPD-13576[c] + AMINO-HYDROXYMETHYL-METHYLPYRIMIDINE-PP[c] + 2 PROTON[c] -> THIAMINE-P[c] + PPI[c] + CARBON-DIOXIDE[c]	METBUDRAFT_4238	PWY-6893	0	0	1000	0	Confidence level: 2	2.5.1.3
ACSERLY-RXN	ACETYLSERINE[c] + HS[c] -> ACET[c] + CYS[c] + PROTON[c]	METBUDRAFT_0613 METBUDRAFT_1279	CYSTSYN-PWY	0	0	1000	0	Confidence level: 2	2.5.1.47
RXN-12086	CPD-13014[c] + WATER[c] <=> CPD-13040[c] + BUTYRIC_ACID[c] + PROTON[c]	METBUDRAFT_1464		1	-1000	1000	0	Confidence level: 2	3.1.1.3
6.3.5.7-RXN	L-glutamyl-tRNAGln[c] + GLN[c] + ATP[c] + WATER[c] -> Charged-GLN-tRNAs[c] + GLT[c] + Pi[c] + ADP[c] + PROTON[c]	METBUDRAFT_2378 METBUDRAFT_2380 METBUDRAFT_2381	PWY-5921	0	0	1000	0	Confidence level: 2	6.3.5.7
RXN-11574	23S-rRNA-guanine-2445[c] + S-ADENOSYLMETHIONINE[c] <=> 23S-RRNA-N2-METHYLGUANINE2445[c] + ADENOSYL-HOMO-CYS[c] + PROTON[c]	METBUDRAFT_4212		1	-1000	1000	0	Confidence level: 2	2.1.1.173
4.1.99.4-RXN	2-OXOBUTANOATE[c] + AMMONIA[c] + PROTON[c] -> CPD-68[c] + WATER[c]	METBUDRAFT_0671		0	0	1000	0	Confidence level: 2	3.5.99.7
RXN-10919	SINAPOYL-COA[c] + PPI[c] + AMP[c] <=> SINAPATE[c] + ATP[c] + CO-A[c]	METBUDRAFT_3338		1	-1000	1000	0	Confidence level: 2	6.2.1.12
3.4.13.22-RXN	D-ALA-D-ALA[c] + WATER[c] -> 2 D-ALANINE[c]	METBUDRAFT_0685		0	0	1000	0	Confidence level: 2	3.4.13.22
RIBOSYLHOMOCYSTEINASE-RXN	CPD-564[c] -> DIHYDROXYPENTANEDIONE[c] + HOMO-CYS[c]		PWY-6151	0	0	1000	0	Confidence level: 0	4.4.1.21
2.6.1.33-RXN	DTDP-DEOH-DEOXY-GLUCOSE[c] + GLT[c] -> CPD-472[c] + 2-KETOGLUTARATE[c]		PWY-6942	0	0	1000	0	Confidence level: 0	2.6.1.33
R321-RXN	CPD-642[c] + OXYGEN-MOLECULE[c] + NADH[c] + 2 PROTON[c] -> CPD-643[c] + NAD[c] + WATER[c]		P381-PWY	0	0	1000	0	Confidence level: 0	1.14.13.83
VALINE--TRNA-LIGASE-RXN	VAL-tRNAs[c] + VAL[c] + ATP[c] + PROTON[c] -> Charged-VAL-tRNAs[c] + PPI[c] + AMP[c]	METBUDRAFT_2457	TRNA-CHARGING-PWY	0	0	1000	0	Confidence level: 2	6.1.1.9
1PFRUCTPHOSN-RXN	FRU1P[c] + ATP[c] -> FRUCTOSE-16-DIPHOSPHATE[c] + ADP[c] + PROTON[c]	METBUDRAFT_2779	PWY0-1314	0	0	1000	0	Confidence level: 2	2.7.1.56
PSERTRANSAM-RXN	3-P-HYDROXYPYRUVATE[c] + GLT[c] -> 3-P-SERINE[c] + 2-KETOGLUTARATE[c]	METBUDRAFT_0261	SERSYN-PWY	0	0	1000	0	Confidence level: 2	2.6.1.52
TYRAMINOTRANS-RXN	P-HYDROXY-PHENYLPYRUVATE[c] + GLT[c] -> TYR[c] + 2-KETOGLUTARATE[c]		TYRSYN	0	0	1000	0	Confidence level: 0	2.6.1.57
PNKIN-RXN	PYRIDOXINE[c] + ATP[c] -> PYRIDOXINE-5P[c] + ADP[c] + PROTON[c]		PLPSAL-PWY	0	0	1000	0	Confidence level: 0	2.7.1.-
PGLUCONDEHYDRAT-RXN	CPD-2961[c] -> 2-KETO-3-DEOXY-6-P-GLUCONATE[c] + WATER[c]	METBUDRAFT_1903	ENTNER-DOUDOROFF-PWY-1	0	0	1000	0	Confidence level: 2	4.2.1.12
OCTAPRENYL-METHYL-METHOXY-BENZOQ-OH-RXN	OCTAPRENYL-METHYL-METHOXY-BENZQ[c] + Donor-H2[c] + OXYGEN-MOLECULE[c] -> OCTAPRENYL-METHYL-OH-METHOXY-BENZQ[c] + Acceptor[c] + WATER[c]		PWY-6708	0	0	1000	0	Confidence level: 0	1.14.-.-
TETHYDPICSUCC-RXN	DELTA1-PIPERIDEINE-2-6-DICARBOXYLATE[c] + SUC-COA[c] + WATER[c] -> N-SUCCINYL-2-AMINO-6-KETOPIMELATE[c] + CO-A[c]	METBUDRAFT_1346	DAPLYSINESYN-PWY	0	0	1000	0	Confidence level: 2	2.3.1.117
METHIONINE--TRNA-LIGASE-RXN	MET-tRNAs[c] + MET[c] + ATP[c] + PROTON[c] -> Charged-MET-tRNAs[c] + PPI[c] + AMP[c]	METBUDRAFT_3160	TRNA-CHARGING-PWY	0	0	1000	0	Confidence level: 2	6.1.1.10
SHIKIMATE-5-DEHYDROGENASE-RXN	3-DEHYDRO-SHIKIMATE[c] + NADPH[c] + PROTON[c] -> SHIKIMATE[c] + NADP[c]	METBUDRAFT_3925	PWY-6163	0	0	1000	0	Confidence level: 2	1.1.1.25
L-LACTATE-DEHYDROGENASE-RXN	PYRUVATE[c] + NADH[c] + PROTON[c] -> L-LACTATE[c] + NAD[c]	METBUDRAFT_3726	PWY-5481	0	0	1000	0	Confidence level: 2	1.1.1.27
RXNN0B-88	2-DEOXYRIBOSE[c] + ATP[c] -> GAP[c] + ACETALD[c] + ADP[c] + PROTON[c]			0	0	1000	0	Confidence level: 0
IGPSYN-RXN	CARBOXYPHENYLAMINO-DEOXYRIBULOSE-P[c] + PROTON[c] -> INDOLE-3-GLYCEROL-P[c] + WATER[c] + CARBON-DIOXIDE[c]	METBUDRAFT_2964	TRPSYN-PWY	0	0	1000	0	Confidence level: 2	4.1.1.48
RXNN0B-57	3 CPDN0B-5[c] + CPDN0B-6[c] -> 4 PYRUVATE[c] + 4 PROTON[c]			0	0	1000	0	Confidence level: 0
HISTIDINE--TRNA-LIGASE-RXN	HIS-tRNAs[c] + HIS[c] + ATP[c] + PROTON[c] -> Charged-HIS-tRNAs[c] + PPI[c] + AMP[c]	METBUDRAFT_3690	TRNA-CHARGING-PWY	0	0	1000	0	Confidence level: 2	6.1.1.21
GPH-RXN	CPD-67[c] + WATER[c] -> GLYCOLLATE[c] + Pi[c]	METBUDRAFT_0507 METBUDRAFT_2151		0	0	1000	0	Confidence level: 2	3.1.3.18
RXN0-743	CPD0-181[c] -> PHOSPHORIBOSYL-CARBOXY-AMINOIMIDAZOLE[c]	METBUDRAFT_1902	PWY-6123	0	0	1000	0	Confidence level: 2	5.4.99.18
GLUTRACE-RXN	GLT[c] -> D-GLT[c]		PWY-6387	0	0	1000	0	Confidence level: 0	5.1.1.3
GLUCOKIN-RXN	GLC[c] + ATP[c] -> GLC-6-P[c] + ADP[c] + PROTON[c]	METBUDRAFT_2431		0	0	1000	0	Confidence level: 2	2.7.1.2
RXN0-1321	tRNA-with-7-aminomethyl-7-deazaguanine[c] + GUANINE[c] -> Guanine34-in-tRNAs[c] + 7-AMINOMETHYL-7-DEAZAGUANINE[c]	METBUDRAFT_3683		0	0	1000	0	Confidence level: 2	2.4.2.29
FORMAMIDASE-RXN	FORMAMIDE[c] + WATER[c] -> FORMATE[c] + AMMONIA[c] + PROTON[c]	METBUDRAFT_1426		0	0	1000	0	Confidence level: 2	3.5.1.49
RXN-9205	CPD-12118[c] + S-ADENOSYLMETHIONINE[c] <=> CPD-12126[c] + ADENOSYL-HOMO-CYS[c] + PROTON[c]	METBUDRAFT_3792	PWY-5844	1	-1000	1000	0	Confidence level: 2	2.1.1.163
DTDPGLUCDEHYDRAT-RXN	DTDP-D-GLUCOSE[c] -> DTDP-DEOH-DEOXY-GLUCOSE[c] + WATER[c]	METBUDRAFT_1926	PWY-6953, PWY-6974, PWY-6942, PWY-6976, PWY-6973, PWY-7104, DTDPRHAMSYN-PWY	0	0	1000	0	Confidence level: 2	4.2.1.46
RXN-8527	HYDROXYMUCONATE-SALD[c] + NAD[c] + WATER[c] -> CPD-13339[c] + NADH[c] + 2 PROTON[c]		PWY-6336	0	0	1000	0	Confidence level: 0	1.2.1.-
DIAMINOPIMDECARB-RXN	MESO-DIAMINOPIMELATE[c] + PROTON[c] -> LYS[c] + CARBON-DIOXIDE[c]	METBUDRAFT_0550 METBUDRAFT_1890	DAPLYSINESYN-PWY	0	0	1000	0	Confidence level: 2	4.1.1.20
RXN-7657	ISOBUTANOL[c] + NAD[c] <=> CPD-7000[c] + NADH[c] + PROTON[c]	METBUDRAFT_1594 METBUDRAFT_2417		1	-1000	1000	0	Confidence level: 2	1.1.1.1
COBINPGUANYLYLTRANS-RXN	ADENOSYLCOBINAMIDE-P[c] + GTP[c] + PROTON[c] -> ADENOSYLCOBINAMIDE-GDP[c] + PPI[c]	METBUDRAFT_2063	PWY-5509, COBALSYN-PWY, PWY-5508	0	0	1000	0	Confidence level: 2	2.7.7.62
RXN-4144	CPD-4081[c] + NADP[c] <=> ALPHA-METHYL-5-ALPHA-ERGOSTA[c] + NADPH[c] + PROTON[c]	METBUDRAFT_1382		1	-1000	1000	0	Confidence level: 2	1.3.1.70
BRANCHED-CHAINAMINOTRANSFERLEU-RXN	2K-4CH3-PENTANOATE[c] + GLT[c] -> LEU[c] + 2-KETOGLUTARATE[c]	METBUDRAFT_1717	LEUSYN-PWY	0	0	1000	0	Confidence level: 2	2.6.1.42
RXN-13443	CPD-14423[c] + NADH-P-OR-NOP[c] + PROTON[c] -> CPD-14424[c] + NAD-P-OR-NOP[c]	METBUDRAFT_1059 METBUDRAFT_2781 METBUDRAFT_2972		0	0	1000	0	Confidence level: 2	1.1.1.100
ARGDECARBOX-RXN	ARG[c] + PROTON[c] -> AGMATHINE[c] + CARBON-DIOXIDE[c]	METBUDRAFT_3985	PWY0-1299, ARGDEG-III-PWY, PWY-43	0	0	1000	0	Confidence level: 2	4.1.1.19
RXN-12811	CPD-13845[c] + GLT[c] -> CPD-13783[c] + 2-KETOGLUTARATE[c]		PWY-6953	0	0	1000	0	Confidence level: 0	2.6.1.90
AGMATINE-DEIMINASE-RXN	AGMATHINE[c] + WATER[c] -> CPD-597[c] + AMMONIA[c] + PROTON[c]	METBUDRAFT_0821	ARGDEG-III-PWY, PWY-43	0	0	1000	0	Confidence level: 2	3.5.3.12
ACETYLORNTRANSAM-RXN	CPD-469[c] + GLT[c] -> N-ALPHA-ACETYLORNITHINE[c] + 2-KETOGLUTARATE[c]	METBUDRAFT_1242	ARGSYNBSUB-PWY	0	0	1000	0	Confidence level: 2	2.6.1.11
RXN-11860	Cytidine-34-tRNAs[c] + S-ADENOSYLMETHIONINE[c] <=> 2-O-Methylcytidine-34-tRNAs[c] + ADENOSYL-HOMO-CYS[c] + PROTON[c]	METBUDRAFT_2590		1	-1000	1000	0	Confidence level: 2	2.1.1.207
5.4.99.18-RXN	CPD-9005[c] <=> PHOSPHORIBOSYL-CARBOXY-AMINOIMIDAZOLE[c]	METBUDRAFT_1902		1	-1000	1000	0	Confidence level: 2	5.4.99.18
4-NITROPHENYLPHOSPHATASE-RXN	CPD-194[c] + WATER[c] <=> P-NITROPHENOL[c] + Pi[c] + PROTON[c]	METBUDRAFT_3231		1	-1000	1000	0	Confidence level: 2	3.1.3.41
RXN-10882	3-4-DIHYDROXYBENZOATE[c] + OXYGEN-MOLECULE[c] <=> CPD-11842[c] + PROTON[c]		PWY-6336	1	-1000	1000	0	Confidence level: 0
3-ISOPROPYLMALISOM-RXN	3-CARBOXY-3-HYDROXY-ISOCAPROATE[c] -> CPD-9451[c] + WATER[c]	METBUDRAFT_3812 METBUDRAFT_3813	LEUSYN-PWY	0	0	1000	0	Confidence level: 2
RIBOFLAVINSYNDEAM-RXN	DIAMINO-OH-PHOSPHORIBOSYLAMINO-PYR[c] + WATER[c] -> CPD-602[c] + AMMONIA[c]	METBUDRAFT_2089	RIBOSYN2-PWY	0	0	1000	0	Confidence level: 2	3.5.4.26
2.3.1.157-RXN	GLUCOSAMINE-1P[c] + ACETYL-COA[c] -> N-ACETYL-D-GLUCOSAMINE-1-P[c] + CO-A[c] + PROTON[c]	METBUDRAFT_2664	UDPNAGSYN-PWY	0	0	1000	0	Confidence level: 2	2.3.1.157
R145-RXN	CPD-1063[c] <=> CPD-8999[c] + WATER[c]	METBUDRAFT_1799	PWY-6755	1	-1000	1000	0	Confidence level: 2	4.2.1.109
UROGENDECARBOX-RXN	UROPORPHYRINOGEN-III[c] + 4 PROTON[c] -> COPROPORPHYRINOGEN_III[c] + 4 CARBON-DIOXIDE[c]	METBUDRAFT_0454 METBUDRAFT_2219	HEME-BIOSYNTHESIS-II, HEMESYN2-PWY, PWY0-1415	0	0	1000	0	Confidence level: 2	4.1.1.37
1.5.1.20-RXN	METHYLENE-THF[c] + NADH[c] + PROTON[c] -> 5-METHYL-THF[c] + NAD[c]	METBUDRAFT_3020	1CMET2-PWY	0	0	1000	0	Confidence level: 2	1.5.1.20
PRPPAMIDOTRANS-RXN	PRPP[c] + GLN[c] + WATER[c] -> 5-P-BETA-D-RIBOSYL-AMINE[c] + GLT[c] + PPI[c]	METBUDRAFT_0304 METBUDRAFT_0498	PWY-6121	0	0	1000	0	Confidence level: 2	2.4.2.14
TRNA-GUANINE-N7--METHYLTRANSFERASE-RXN	Guanine46-in-tRNA[c] + S-ADENOSYLMETHIONINE[c] <=> tRNA-Containing-N7-Methylguanine-46[c] + ADENOSYL-HOMO-CYS[c]	METBUDRAFT_2953		1	-1000	1000	0	Confidence level: 2	2.1.1.33
PHOSPHOGLUCMUT-RXN	ALPHA-GLC-6-P[c] -> GLC-1-P[c]	METBUDRAFT_0536 METBUDRAFT_2979	PWYN0B-20, PWYN0B-19	0	0	1000	0	Confidence level: 2	5.4.2.2
PDXJ-RXN	DEOXYXYLULOSE-5P[c] + 1-AMINO-PROPAN-2-ONE-3-PHOSPHATE[c] -> PYRIDOXINE-5P[c] + Pi[c] + 2 WATER[c] + PROTON[c]	METBUDRAFT_2558	PYRIDOXSYN-PWY	0	0	1000	0	Confidence level: 2	2.6.99.2
NICOTINATEPRIBOSYLTRANS-RXN	NICOTINATE_NUCLEOTIDE[c] + PPI[c] -> PRPP[c] + NIACINE[c] + PROTON[c]	METBUDRAFT_2656	PYRIDNUCSAL-PWY	0	0	1000	0	Confidence level: 2	2.4.2.11
SULFATE-ADENYLYLTRANS-RXN	SULFATE[c] + ATP[c] + PROTON[c] -> APS[c] + PPI[c]	METBUDRAFT_1566 METBUDRAFT_1568	SO4ASSIM-PWY-1	0	0	1000	0	Confidence level: 2	2.7.7.4
MERCURY-II-REDUCTASE-RXN	HG0[c] + NADP[c] + PROTON[c] <=> HG__43__2[c] + NADPH[c]	METBUDRAFT_1882		1	-1000	1000	0	Confidence level: 2	1.16.1.1
SERINE--PYRUVATE-AMINOTRANSFERASE-RXN	SER[c] + PYRUVATE[c] <=> OH-PYR[c] + L-ALPHA-ALANINE[c]	METBUDRAFT_2200		1	-1000	1000	0	Confidence level: 2	2.6.1.51
KDPGALDOL-RXN	2-KETO-3-DEOXY-6-P-GLUCONATE[c] + PROTON[c] -> CPDN0B-6[c] + GAP[c]	METBUDRAFT_1904	ENTNER-DOUDOROFF-PWY-1	0	0	1000	0	Confidence level: 2	4.1.2.14
RXNN0B-84	METOH[c] + NAD[c] -> FORMALDEHYDE[c] + NADH[c] + PROTON[c]			0	0	1000	0	Confidence level: 0	1.1.1.1
HYDROXYLAMINE-REDUCTASE-NADH-RXN	HYDROXYLAMINE[c] + NADH[c] + PROTON[c] -> AMMONIA[c] + NAD[c] + WATER[c]	METBUDRAFT_2519		0	0	1000	0	Confidence level: 2	1.7.1.10
RXNN0B-42	GLC-6-P[c] + NAD-P-OR-NOP[c] -> D-6-P-GLUCONO-DELTA-LACTONE[c] + NADH-P-OR-NOP[c] + PROTON[c]		ENTNER-DOUDOROFF-PWY-1, PWYN0B-32	0	0	1000	0	Confidence level: 0	1.1.1.49
HISTALDEHYD-RXN	HISTIDINAL[c] + NAD[c] + WATER[c] -> HIS[c] + NADH[c] + 2 PROTON[c]	METBUDRAFT_2500	HISTSYN-PWY	0	0	1000	0	Confidence level: 2
RXN66-306	44-DIMETHYL-824-CHOLESTADIENOL[c] + NADP[c] <=> 44-DIMETHYL-CHOLESTA-812-24-TRIENOL[c] + NADPH[c] + PROTON[c]	METBUDRAFT_1382		1	-1000	1000	0	Confidence level: 2	1.3.1.70
GLYOXII-RXN	S-LACTOYL-GLUTATHIONE[c] + WATER[c] -> GLUTATHIONE[c] + D-LACTATE[c] + PROTON[c]	METBUDRAFT_1918	PWY-5386	0	0	1000	0	Confidence level: 2	3.1.2.6
RXN0-6515	16S-rRNA-guanine-966[c] + S-ADENOSYLMETHIONINE[c] <=> 16S-rRNA-N2-methylguanine966[c] + ADENOSYL-HOMO-CYS[c] + PROTON[c]	METBUDRAFT_4417		1	-1000	1000	0	Confidence level: 2	2.1.1.171
GLUTCYSLIG-RXN	GLT[c] + CYS[c] + ATP[c] -> L-GAMMA-GLUTAMYLCYSTEINE[c] + Pi[c] + ADP[c] + PROTON[c]	METBUDRAFT_1705	GLUTATHIONESYN-PWY	0	0	1000	0	Confidence level: 2	6.3.2.2
RXN0-5114	3-P-SERINE[c] + WATER[c] -> SER[c] + Pi[c]	METBUDRAFT_4243	SERSYN-PWY	0	0	1000	0	Confidence level: 2	3.1.3.3
GDPPYPHOSKIN-RXN	GDP[c] + ATP[c] -> GUANOSINE-5DP-3DP[c] + AMP[c]	METBUDRAFT_2633	PPGPPMET-PWY	0	0	1000	0	Confidence level: 2	2.7.6.5
RXN-9929	DI-H-OROTATE[c] + FUM[c] -> OROTATE[c] + SUC[c]	METBUDRAFT_2527	PWY-5686-1	0	0	1000	0	Confidence level: 2	1.3.98.1
FADSYN-RXN	FMN[c] + ATP[c] + PROTON[c] -> FAD[c] + PPI[c]	METBUDRAFT_3751	RIBOSYN2-PWY	0	0	1000	0	Confidence level: 2	2.7.7.2
RXN-8999	8 DELTA3-ISOPENTENYL-PP[c] + FARNESYL-PP[c] -> UNDECAPRENYL-DIPHOSPHATE[c] + 8 PPI[c]	METBUDRAFT_2010	PWY-5785	0	0	1000	0	Confidence level: 2	2.5.1.31
DMBPPRIBOSYLTRANS-RXN	DIMETHYLBENZIMIDAZOLE[c] + NICOTINATE_NUCLEOTIDE[c] -> ALPHA-RIBAZOLE-5-P[c] + NIACINE[c] + PROTON[c]	METBUDRAFT_2050	PWY-5509, COBALSYN-PWY, PWY-5508	0	0	1000	0	Confidence level: 2	2.4.2.21
DETHIOBIOTIN-SYN-RXN	DIAMINONONANOATE[c] + ATP[c] + CARBON-DIOXIDE[c] -> DETHIOBIOTIN[c] + Pi[c] + ADP[c] + 3 PROTON[c]	METBUDRAFT_0309	PWY0-1507	0	0	1000	0	Confidence level: 2	6.3.3.3
COBALAMIN5PSYN-RXN	ALPHA-RIBAZOLE-5-P[c] + ADENOSYLCOBINAMIDE-GDP[c] + PROTON[c] <=> ADENOSYLCOBALAMIN-5-P[c] + GMP[c]	METBUDRAFT_2060	PWY-5509, COBALSYN-PWY	1	-1000	1000	0	Confidence level: 2	2.7.8.26
RXN-2882	THMPT[c] + FORMALDEHYDE[c] -> METHYLENETETRAHYDROMETHANOPTERIN[c] + WATER[c]	METBUDRAFT_0275 METBUDRAFT_0466 METBUDRAFT_1074 METBUDRAFT_1304	PWY-1723	0	0	1000	0	Confidence level: 2
ATPPHOSPHORIBOSYLTRANS-RXN	PRPP[c] + ATP[c] -> PHOSPHORIBOSYL-ATP[c] + PPI[c]	METBUDRAFT_0101 METBUDRAFT_2499	HISTSYN-PWY	0	0	1000	0	Confidence level: 2	2.4.2.17
RXN-13202	AMMONIA[c] + HCO3[c] + 2 ATP[c] -> CARBAMOYL-P[c] + Pi[c] + 2 ADP[c] + PROTON[c]	METBUDRAFT_1235 METBUDRAFT_1236	PWY-5686-1, ARGSYNBSUB-PWY	0	0	1000	0	Confidence level: 2	6.3.5.5
AMYLOMALT-RXN	MALTOTETRAOSE[c] + GLC[c] -> MALTOSE[c] + MALTOTRIOSE[c]	METBUDRAFT_3837		0	0	1000	0	Confidence level: 2	2.4.1.25
RXN-12768	CPD-13777[c] + GLT[c] -> CPD-13775[c] + 2-KETOGLUTARATE[c]		PWY-6942	0	0	1000	0	Confidence level: 0	2.6.1.-
ADENYLOSUCCINATE-SYNTHASE-RXN	GTP[c] + IMP[c] + L-ASPARTATE[c] -> ADENYLOSUCC[c] + GDP[c] + Pi[c] + 2 PROTON[c]	METBUDRAFT_0102	PWY-6126	0	0	1000	0	Confidence level: 2	6.3.4.4
RXN-12460	Charged-ASN-tRNAs[c] + WATER[c] <=> ASN-tRNAs[c] + ASN[c] + 2 PROTON[c]	METBUDRAFT_1644	PWY490-4	1	-1000	1000	0	Confidence level: 2	3.1.1.29
ACETOOHBUTSYN-RXN	2-OXOBUTANOATE[c] + PYRUVATE[c] + PROTON[c] -> 2-ACETO-2-HYDROXY-BUTYRATE[c] + CARBON-DIOXIDE[c]	METBUDRAFT_2310 METBUDRAFT_2311	ILEUSYN-PWY	0	0	1000	0	Confidence level: 2	2.2.1.6
5.4.1.2-RXN	CPD-686[c] + PROTON[c] -> CPD-687[c]	METBUDRAFT_0730	P381-PWY	0	0	1000	0	Confidence level: 2	5.4.1.2
RXN-11350	2 CPD-12295[c] <=> CPD-12310[c] + UNDECAPRENYL-DIPHOSPHATE[c] + PROTON[c]	METBUDRAFT_1886 METBUDRAFT_3617		1	-1000	1000	0	Confidence level: 2	2.4.1.129
3.6.4.9-RXN	ATP[c] + WATER[c] -> Pi[c] + ADP[c] + PROTON[c]	METBUDRAFT_1394 METBUDRAFT_4003		0	0	1000	0	Confidence level: 2	3.6.4.9
RXN-10703	CPD-11527[c] + NAD[c] <=> CPD-11528[c] + NADH[c] + PROTON[c]	METBUDRAFT_3643		1	-1000	1000	0	Confidence level: 2	1.1.1.35
3-DEHYDROQUINATE-DEHYDRATASE-RXN	DEHYDROQUINATE[c] -> 3-DEHYDRO-SHIKIMATE[c] + WATER[c]	METBUDRAFT_0595	PWY-6163	0	0	1000	0	Confidence level: 2	4.2.1.10
RIBAZOLEPHOSPHAT-RXN	ALPHA-RIBAZOLE-5-P[c] + WATER[c] -> ALPHA-RIBAZOLE[c] + Pi[c]	METBUDRAFT_2061	PWY-5508	0	0	1000	0	Confidence level: 2	3.1.3.73
2.1.1.151-RXN	COBALT-SIROHYDROCHLORIN[c] + S-ADENOSYLMETHIONINE[c] <=> COBALT-FACTOR-III[c] + ADENOSYL-HOMO-CYS[c] + PROTON[c]	METBUDRAFT_0727		1	-1000	1000	0	Confidence level: 2	2.1.1.151
R102-RXN	CPD-470[c] + ACETYL-COA[c] -> N-ACETYL-L-24-DIAMINOBUTANOATE[c] + CO-A[c] + PROTON[c]	METBUDRAFT_2402	P101-PWY	0	0	1000	0	Confidence level: 2	2.3.1.178
UNDECAPRENYL-DIPHOSPHATASE-RXN	UNDECAPRENYL-DIPHOSPHATE[c] + WATER[c] <=> CPD-9646[c] + Pi[c] + PROTON[c]	METBUDRAFT_0477		1	-1000	1000	0	Confidence level: 2	3.6.1.27
1.2.1.2-RXN	FORMATE[c] + NAD[c] -> NADH[c] + CARBON-DIOXIDE[c]	METBUDRAFT_0831 METBUDRAFT_2827 METBUDRAFT_2828 METBUDRAFT_2829 METBUDRAFT_2831	PWY-1881	0	0	1000	0	Confidence level: 2	1.2.1.2
PROLINE--TRNA-LIGASE-RXN	PRO-tRNAs[c] + PRO[c] + ATP[c] + PROTON[c] -> Charged-PRO-tRNAs[c] + PPI[c] + AMP[c]	METBUDRAFT_0860	TRNA-CHARGING-PWY	0	0	1000	0	Confidence level: 2	6.1.1.15
PHOSPHASERDECARB-RXN	CPD-12817[c] + PROTON[c] -> CPD-12819[c] + CARBON-DIOXIDE[c]	METBUDRAFT_0664	PWYN0B-39	0	0	1000	0	Confidence level: 2	4.1.1.65
THRESYN-RXN	O-PHOSPHO-L-HOMOSERINE[c] + WATER[c] -> THR[c] + Pi[c]	METBUDRAFT_0780	HOMOSER-THRESYN-PWY	0	0	1000	0	Confidence level: 2	4.2.3.1
PANTEPADENYLYLTRAN-RXN	PANTETHEINE-P[c] + ATP[c] + PROTON[c] -> DEPHOSPHO-COA[c] + PPI[c]	METBUDRAFT_1923	COA-PWY	0	0	1000	0	Confidence level: 2	2.7.7.3
NARINGENIN-CHALCONE-SYNTHASE-RXN	P-COUMAROYL-COA[c] + 3 MALONYL-COA[c] + 3 PROTON[c] <=> APIGENIN[c] + 4 CO-A[c] + 3 CARBON-DIOXIDE[c]	METBUDRAFT_1461		1	-1000	1000	0	Confidence level: 2	2.3.1.74
SUCCSEMIALDDEHYDROG-RXN	SUCC-S-ALD[c] + NADP[c] + WATER[c] <=> SUC[c] + NADPH[c] + 2 PROTON[c]			1	-1000	1000	0	Confidence level: 0	1.2.1.79
MALIC-NADP-RXN	PYRUVATE[c] + NADPH[c] + CARBON-DIOXIDE[c] <=> MAL[c] + NADP[c]	METBUDRAFT_2185	PWYN0B-33, GLUCONEO-PWY	1	-1000	1000	0	Confidence level: 2	1.1.1.40
SAICARSYN-RXN	PHOSPHORIBOSYL-CARBOXY-AMINOIMIDAZOLE[c] + L-ASPARTATE[c] + ATP[c] -> P-RIBOSYL-4-SUCCCARB-AMINOIMIDAZOLE[c] + Pi[c] + ADP[c] + PROTON[c]	METBUDRAFT_2983	PWY-6123	0	0	1000	0	Confidence level: 2	6.3.2.6
KDO-8PSYNTH-RXN	ARABINOSE-5P[c] + PHOSPHO-ENOL-PYRUVATE[c] + WATER[c] -> KDO-8P[c] + Pi[c]	METBUDRAFT_0471	PWY-1269	0	0	1000	0	Confidence level: 2	2.5.1.55
RXNN0B-77	UDP-GLUCOSE[c] -> CPD-14553[c]			0	0	1000	0	Confidence level: 0	5.1.3.2
HOMOSERKIN-RXN	HOMO-SER[c] + ATP[c] -> O-PHOSPHO-L-HOMOSERINE[c] + ADP[c] + PROTON[c]	METBUDRAFT_2048	HOMOSER-THRESYN-PWY	0	0	1000	0	Confidence level: 2	2.7.1.39
RXNN0B-31	PHOSPHO-ENOL-PYRUVATE[c] + ADP[c] + 2 PROTON[c] -> CPDN0B-5[c] + ATP[c]		PWYN0B-24	0	0	1000	0	Confidence level: 0
H2PTERIDINEPYROPHOSPHOKIN-RXN	AMINO-OH-HYDROXYMETHYL-DIHYDROPTERIDINE[c] + ATP[c] -> DIHYDROPTERIN-CH2OH-PP[c] + AMP[c] + PROTON[c]	METBUDRAFT_2465 METBUDRAFT_3031	PWY-6147	0	0	1000	0	Confidence level: 2	2.7.6.3
RXN66-14	CPD-8610[c] + NADP[c] <=> CPD-8609[c] + NADPH[c] + PROTON[c]	METBUDRAFT_1382		1	-1000	1000	0	Confidence level: 2	1.3.1.70
GLYCOLATE-REDUCTASE-RXN	GLYCOLLATE[c] + NAD[c] <=> GLYOX[c] + NADH[c] + PROTON[c]			1	-1000	1000	0	Confidence level: 0	1.1.1.26
RXN0-6427	GDP-TP[c] + WATER[c] -> GTP[c] + PPI[c] + PROTON[c]	METBUDRAFT_3787	PPGPPMET-PWY	0	0	1000	0	Confidence level: 2	3.1.7.2
GLUTATHIONE-PEROXIDASE-RXN	2 GLUTATHIONE[c] + HYDROGEN-PEROXIDE[c] -> OXIDIZED-GLUTATHIONE[c] + 2 WATER[c]	METBUDRAFT_1521	PWY-4081	0	0	1000	0	Confidence level: 2	1.11.1.9
RXN0-4022	7-AMINOMETHYL-7-DEAZAGUANINE[c] + 2 NADP[c] -> 7-CYANO-7-DEAZAGUANINE[c] + 2 NADPH[c] + 3 PROTON[c]	METBUDRAFT_0666		0	0	1000	0	Confidence level: 2	1.7.1.13
GDP-4-DEHYDRO-D-RHAMNOSE-REDUCTASE-RXN	CPD-353[c] + NAD-P-OR-NOP[c] <=> GDP-4-DEHYDRO-6-DEOXY-D-MANNOSE[c] + NADH-P-OR-NOP[c] + PROTON[c]			1	-1000	1000	0	Confidence level: 0	1.1.1.187/1.1.1.281
RXN-9386	GLN-tRNAs[c] + GLT[c] + ATP[c] + PROTON[c] -> L-glutamyl-tRNAGln[c] + PPI[c] + AMP[c]		PWY-5921	0	0	1000	0	Confidence level: 0
EXOPOLYPHOSPHATASE-RXN	WATER[c] <=> Long-Chain-Polyphosphate[c] + Pi[c] + PROTON[c]	METBUDRAFT_1721		1	-1000	1000	0	Confidence level: 2	3.6.1.11
RXN-8783	L-GULONO-1-4-LACTONE[c] + WATER[c] <=> L-GULONATE[c] + PROTON[c]	METBUDRAFT_0430		1	-1000	1000	0	Confidence level: 2	3.1.1.17
DIHYDROXYMETVALDEHYDRAT-RXN	1-KETO-2-METHYLVALERATE[c] -> 2-KETO-3-METHYL-VALERATE[c] + WATER[c]	METBUDRAFT_1245	ILEUSYN-PWY	0	0	1000	0	Confidence level: 2	4.2.1.9
RXN-8062	CPD-7591[c] <=> CPD-7592[c]			1	-1000	1000	0	Confidence level: 0
DCDPKIN-RXN	DCDP[c] + ATP[c] -> DCTP[c] + ADP[c]	METBUDRAFT_3687	PWY0-166	0	0	1000	0	Confidence level: 2	2.7.4.6
CHORPYRLY-RXN	CHORISMATE[c] -> 4-hydroxybenzoate[c] + PYRUVATE[c]	METBUDRAFT_3784	PWY-5755	0	0	1000	0	Confidence level: 2	4.1.3.40
RXN-1381	CPDN0B-7[c] + GLYCEROL-3P[c] -> 1-PALMITOYLGLYCEROL-3-PHOSPHATE[c] + CO-A[c]	METBUDRAFT_1056 METBUDRAFT_3029	PWYN0B-39	0	0	1000	0	Confidence level: 2	2.3.1.15
ASPARTATEKIN-RXN	L-ASPARTATE[c] + ATP[c] -> L-BETA-ASPARTYL-P[c] + ADP[c]	METBUDRAFT_1540	DAPLYSINESYN-PWY, P101-PWY, HOMOSERSYN-PWY	0	0	1000	0	Confidence level: 2	2.7.2.4
RXN-12940	CPD-13380[c] + NADH-P-OR-NOP[c] + 2 PROTON[c] -> CPD-13985[c] + NAD-P-OR-NOP[c]		PWY-6976	0	0	1000	0	Confidence level: 0	1.17.1.-
RXN-12752	CPD0-2472[c] -> CPD-653[c]		PWY-6938	0	0	1000	0	Confidence level: 0	5.1.99.6
ADENPRIBOSYLTRAN-RXN	ADENINE[c] + PRPP[c] -> PPI[c] + AMP[c]	METBUDRAFT_4512	PWY-6610	0	0	1000	0	Confidence level: 2	2.4.2.7
RXN-12404	DTDP-DEOH-DEOXY-GLUCOSE[c] -> CPD-13380[c] + WATER[c] + PROTON[c]		PWY-6974, PWY-6976, PWY-6973, PWY-7104	0	0	1000	0	Confidence level: 0	4.2.1.-
ACETOLACTREDUCTOISOM-RXN	2-ACETO-LACTATE[c] + NADPH[c] + PROTON[c] -> DIOH-ISOVALERATE[c] + NADP[c]	METBUDRAFT_2309	VALSYN-PWY	0	0	1000	0	Confidence level: 2	1.1.1.86
RXN-11637	16S-rRNA-cytidine1402[c] + S-ADENOSYLMETHIONINE[c] <=> 16S-rRNA-2-O-methylcytidine1402[c] + ADENOSYL-HOMO-CYS[c] + PROTON[c]	METBUDRAFT_3612		1	-1000	1000	0	Confidence level: 2	2.1.1.198
5-METHYLTHIOADENOSINE-PHOSPHORYLASE-RXN	5-METHYLTHIOADENOSINE[c] + Pi[c] -> CPD-444[c] + ADENINE[c]	METBUDRAFT_3821	PWY-6756	0	0	1000	0	Confidence level: 2	2.4.2.28
RXN-11291	2 CPD-12297[c] <=> CPD-12259[c] + UNDECAPRENYL-DIPHOSPHATE[c] + PROTON[c]	METBUDRAFT_1886 METBUDRAFT_3617		1	-1000	1000	0	Confidence level: 2	2.4.1.129
RXN-10698	CPD-11519[c] + NAD[c] <=> CPD-11520[c] + NADH[c] + PROTON[c]	METBUDRAFT_3643		1	-1000	1000	0	Confidence level: 2	1.1.1.35
2PGADEHYDRAT-RXN	2-PG[c] <=> PHOSPHO-ENOL-PYRUVATE[c] + WATER[c]	METBUDRAFT_0472	PWYN0B-24, GLUCONEO-PWY	1	-1000	1000	0	Confidence level: 2	4.2.1.11
R82-RXN	CPD-8999[c] -> 2-HYDROXY-3-KETO-5-METHYLTHIO-1-PHOSPHOP[c] + PROTON[c]	METBUDRAFT_1801	PWY-6755	0	0	1000	0	Confidence level: 2	5.3.2.5
2.1.1.131-RXN	CPD-643[c] + S-ADENOSYLMETHIONINE[c] -> CPD-651[c] + ADENOSYL-HOMO-CYS[c] + 2 PROTON[c]	METBUDRAFT_0724	P381-PWY	0	0	1000	0	Confidence level: 2	2.1.1.131
QUINOPRIBOTRANS-RXN	QUINOLINATE[c] + PRPP[c] + 2 PROTON[c] -> NICOTINATE_NUCLEOTIDE[c] + PPI[c] + CARBON-DIOXIDE[c]	METBUDRAFT_3755	PYRIDNUCSYN-PWY	0	0	1000	0	Confidence level: 2	2.4.2.19
PYRROLINECARBREDUCT-RXN	L-DELTA1-PYRROLINE_5-CARBOXYLATE[c] + NADH-P-OR-NOP[c] + 2 PROTON[c] -> PRO[c] + NAD-P-OR-NOP[c]	METBUDRAFT_2974	PROSYN-PWY	0	0	1000	0	Confidence level: 2	1.5.1.2
UDPKIN-RXN	UDP[c] + ATP[c] <=> UTP[c] + ADP[c]		PWY-5687	1	-1000	1000	0	Confidence level: 0	2.7.4.6
1.1.1.262-RXN	4-PHOSPHONOOXY-THREONINE[c] + NAD[c] -> 2-AMINO-3-OXO-4-PHOSPHONOOXYBUTYRATE[c] + NADH[c] + 2 PROTON[c]	METBUDRAFT_2182	PYRIDOXSYN-PWY	0	0	1000	0	Confidence level: 2
PREPHENATEDEHYDRAT-RXN	PREPHENATE[c] + PROTON[c] -> PHENYL-PYRUVATE[c] + WATER[c] + CARBON-DIOXIDE[c]	METBUDRAFT_0262	PHESYN	0	0	1000	0	Confidence level: 2	4.2.1.51
PHOSMANMUT-RXN	MANNOSE-6P[c] -> MANNOSE-1P[c]	METBUDRAFT_2214 METBUDRAFT_2979	PWY-5659	0	0	1000	0	Confidence level: 2	5.4.2.8
THREODEHYD-RXN	THR[c] + NAD[c] -> AMINO-OXOBUT[c] + NADH[c] + 2 PROTON[c]		THREONINE-DEG2-PWY	0	0	1000	0	Confidence level: 0	1.1.1.103
P-PANTOCYSDECARB-RXN	R-4-PHOSPHOPANTOTHENOYL-L-CYSTEINE[c] + PROTON[c] -> PANTETHEINE-P[c] + CARBON-DIOXIDE[c]	METBUDRAFT_2981	COA-PWY	0	0	1000	0	Confidence level: 2	4.1.1.36
THIOSULFATE-SULFURTRANSFERASE-RXN	S2O3[c] + HCN[c] -> SO3[c] + HSCN[c] + 2 PROTON[c]	METBUDRAFT_1678	PWY-5350	0	0	1000	0	Confidence level: 2	2.8.1.1
NAD-SYNTH-GLN-RXN	DEAMIDO-NAD[c] + GLN[c] + ATP[c] + WATER[c] -> GLT[c] + PPI[c] + AMP[c] + NAD[c] + PROTON[c]	METBUDRAFT_1677	PYRIDNUCSAL-PWY, PYRIDNUCSYN-PWY	0	0	1000	0	Confidence level: 2	6.3.5.1
SUCCCOASYN-RXN	SUC[c] + ATP[c] + CO-A[c] <=> SUC-COA[c] + Pi[c] + ADP[c]	METBUDRAFT_2277 METBUDRAFT_2278	TCA	1	-1000	1000	0	Confidence level: 2	6.2.1.5
LYSINE-23-AMINOMUTASE-RXN	LYS[c] <=> CPD-233[c]	METBUDRAFT_2027		1	-1000	1000	0	Confidence level: 2	5.4.3.2
ISOLEUCINE--TRNA-LIGASE-RXN	ILE-tRNAs[c] + ILE[c] + ATP[c] + PROTON[c] -> Charged-ILE-tRNAs[c] + PPI[c] + AMP[c]	METBUDRAFT_3752	TRNA-CHARGING-PWY	0	0	1000	0	Confidence level: 2	6.1.1.5
RXNN0B-74	PYRUVATE[c] + NADH[c] + PROTON[c] -> Lactate[c] + NAD[c]			0	0	1000	0	Confidence level: 0
HOMOCYSMET-RXN	CPD-1302[c] + HOMO-CYS[c] + 4 PROTON[c] -> CPD-1301[c] + MET[c]		PWY-6151, HOMOSER-METSYN-PWY	0	0	1000	0	Confidence level: 0	2.1.1.14
RXNN0B-28	CPD-208[c] <=> GLYOX[c] + ACETYL-COA[c]			1	-1000	1000	0	Confidence level: 0	4.1.3.24
GUANYL-KIN-RXN	GMP[c] + ATP[c] -> GDP[c] + ADP[c]	METBUDRAFT_2648	PWY-6125	0	0	1000	0	Confidence level: 2	2.7.4.8
RXN490-3616	ASN-tRNAs[c] + L-ASPARTATE[c] + ATP[c] + PROTON[c] -> L-aspartyl-tRNAAsn[c] + PPI[c] + AMP[c]		PWY490-4	0	0	1000	0	Confidence level: 0	6.1.1.-
GLYCINE--TRNA-LIGASE-RXN	GLY-tRNAs[c] + GLY[c] + ATP[c] + PROTON[c] -> Charged-GLY-tRNAs[c] + PPI[c] + AMP[c]	METBUDRAFT_2423 METBUDRAFT_2424	TRNA-CHARGING-PWY	0	0	1000	0	Confidence level: 2	6.1.1.14
RXN0-5515	CTP[c] + 2-3-4-Saturated-L-Phosphatidates[c] + PROTON[c] -> CDP-2-3-4-Saturated-Diacylglycerols[c] + PPI[c]	METBUDRAFT_2009		0	0	1000	0	Confidence level: 2	2.7.7.41
GLUTAMIDOTRANS-RXN	PHOSPHORIBULOSYL-FORMIMINO-AICAR-P[c] + GLN[c] -> D-ERYTHRO-IMIDAZOLE-GLYCEROL-P[c] + AICAR[c] + GLT[c] + PROTON[c]		HISTSYN-PWY	0	0	1000	0	Confidence level: 0	2.4.2.-
RXN0-302	2-PHOSPHO-4-CYTIDINE-5-DIPHOSPHO-2-C-MET[c] -> 2C-METH-D-ERYTHRITOL-CYCLODIPHOSPHATE[c] + CMP[c]	METBUDRAFT_0475	NONMEVIPP-PWY	0	0	1000	0	Confidence level: 2	4.6.1.12
GALPMUT-RXN	CPD-14553[c] -> UDP-D-GALACTO-14-FURANOSE[c]		OANTIGEN-PWY	0	0	1000	0	Confidence level: 0	5.4.99.9
RXN-9366	CPD-12122[c] + S-ADENOSYLMETHIONINE[c] <=> CPD-12130[c] + ADENOSYL-HOMO-CYS[c] + PROTON[c]	METBUDRAFT_3792		1	-1000	1000	0	Confidence level: 2	2.1.1.163
ENZRXN-161-RXN	BUTANAL[c] + NADH[c] + PROTON[c] -> BUTANOL[c] + NAD[c]			0	0	1000	0	Confidence level: 0	1.1.1.-
RXN-8769	CPD-9049[c] + 2 GLN[c] + 2 ATP[c] + 2 WATER[c] <=> CPD-689[c] + 2 GLT[c] + 2 Pi[c] + 2 ADP[c] + 3 PROTON[c]	METBUDRAFT_0733		1	-1000	1000	0	Confidence level: 2	6.3.5.11
DIHYDRONEOPTERIN-MONO-P-DEPHOS-RXN	DIHYDRONEOPTERIN-P[c] + WATER[c] -> DIHYDRO-NEO-PTERIN[c] + Pi[c]		PWY-6147	0	0	1000	0	Confidence level: 0	3.6.1.-
RXN-7908	CPD-5881[c] <=> BIOPTERIN[c] + WATER[c]	METBUDRAFT_0373		1	-1000	1000	0	Confidence level: 2	4.2.1.96
DALADALALIG-RXN	2 D-ALANINE[c] + ATP[c] -> D-ALA-D-ALA[c] + Pi[c] + ADP[c] + PROTON[c]	METBUDRAFT_3626	PWY-6387	0	0	1000	0	Confidence level: 2	6.3.2.4
CDPKIN-RXN	CDP[c] + ATP[c] <=> CTP[c] + ADP[c]			1	-1000	1000	0	Confidence level: 0	2.7.4.6
RXN-13659	CPD-14681[c] -> CPD-14682[c]		PWY-7104	0	0	1000	0	Confidence level: 0	5.3.1.-
ASPARAGINE--TRNA-LIGASE-RXN	ASN-tRNAs[c] + ASN[c] + ATP[c] + PROTON[c] -> Charged-ASN-tRNAs[c] + PPI[c] + AMP[c]		TRNA-CHARGING-PWY	0	0	1000	0	Confidence level: 0	6.1.1.22
RXN-12931	CPD-13381[c] + S-ADENOSYLMETHIONINE[c] -> CPD-13958[c] + ADENOSYL-HOMO-CYS[c] + PROTON[c]		PWY-6973	0	0	1000	0	Confidence level: 0	2.1.1.-
ALANINE-DEHYDROGENASE-RXN	AMMONIA[c] + PYRUVATE[c] + NADH[c] + 2 PROTON[c] -> L-ALPHA-ALANINE[c] + NAD[c] + WATER[c]	METBUDRAFT_3722	PWY1-2	0	0	1000	0	Confidence level: 2	1.4.1.1
RXN-12720	SELENATE[c] + ATP[c] + 2 PROTON[c] <=> CPD-13713[c] + PPI[c]	METBUDRAFT_1566 METBUDRAFT_1568		1	-1000	1000	0	Confidence level: 2	2.7.7.4
ADENOSINE-KINASE-RXN	ADENOSINE[c] + ATP[c] -> AMP[c] + ADP[c] + PROTON[c]	METBUDRAFT_1259	PWY-6619	0	0	1000	0	Confidence level: 2	2.7.1.20
RXN-12253	CPD-13172[c] + BENZYL-ALCOHOL[c] + PROTON[c] <=> CPD-13175[c] + WATER[c]	METBUDRAFT_0131		1	-1000	1000	0	Confidence level: 2	3.1.1.1
ACETALD-DEHYDROG-RXN	ACETALD[c] + CO-A[c] + NAD[c] <=> ACETYL-COA[c] + NADH[c] + PROTON[c]		PWY-5480, PWY-6587	1	-1000	1000	0	Confidence level: 0	1.2.1.10
RXN-11598	16S-rRNA-uracil1498[c] + S-ADENOSYLMETHIONINE[c] <=> 16S-rRNA-N3-methyluracil1498[c] + ADENOSYL-HOMO-CYS[c] + PROTON[c]	METBUDRAFT_3019		1	-1000	1000	0	Confidence level: 2	2.1.1.193
4OHBENZOATE-OCTAPRENYLTRANSFER-RXN	OCTAPRENYL-DIPHOSPHATE[c] + 4-hydroxybenzoate[c] -> 3-OCTAPRENYL-4-HYDROXYBENZOATE[c] + PPI[c]	METBUDRAFT_4063	PWY-6708	0	0	1000	0	Confidence level: 2	2.5.1.39
RXN-1122	5-HYDROXY-FERULIC-ACID[c] + ATP[c] + CO-A[c] <=> 5-HYDROXY-FERULOYL-COA[c] + PPI[c] + AMP[c]	METBUDRAFT_3338		1	-1000	1000	0	Confidence level: 2	6.2.1.12
2.7.7.60-RXN	2-C-METHYL-D-ERYTHRITOL-4-PHOSPHATE[c] + CTP[c] + PROTON[c] -> 4-CYTIDINE-5-DIPHOSPHO-2-C[c] + PPI[c]	METBUDRAFT_0474	NONMEVIPP-PWY	0	0	1000	0	Confidence level: 2	2.7.7.60
R343-RXN	FMNH2[c] + 2 CPD-689[c] -> 2 CPD-694[c] + FMN[c] + 3 PROTON[c]		PWY-5509, PWY-5508	0	0	1000	0	Confidence level: 0	1.16.8.1
2-OCTAPRENYL-METHOXY-BENZOQ-METH-RXN	OCTAPRENYL-METHOXY-BENZOQUINONE[c] + S-ADENOSYLMETHIONINE[c] -> OCTAPRENYL-METHYL-METHOXY-BENZQ[c] + ADENOSYL-HOMO-CYS[c] + PROTON[c]		PWY-6708	0	0	1000	0	Confidence level: 0	2.1.1.201
PYRIMSYN1-RXN	5-PHOSPHORIBOSYL-5-AMINOIMIDAZOLE[c] + S-ADENOSYLMETHIONINE[c] -> CH33ADO[c] + CARBON-MONOXIDE[c] + MET[c] + FORMATE[c] + AMINO-HYDROXYMETHYL-METHYL-PYR-P[c] + 3 PROTON[c]		PWY-6890	0	0	1000	0	Confidence level: 0	4.1.99.17
UDP-NACMURALGLDAPLIG-RXN	UDP-AA-GLUTAMATE[c] + MESO-DIAMINOPIMELATE[c] + ATP[c] -> UDP-AAGM-DIAMINOHEPTANEDIOATE[c] + Pi[c] + ADP[c] + PROTON[c]	METBUDRAFT_3618	PWY-6387	0	0	1000	0	Confidence level: 2	6.3.2.13
PPGPPSYN-RXN	GUANOSINE-5DP-3DP[c] + WATER[c] -> GDP[c] + PPI[c] + PROTON[c]	METBUDRAFT_3787	PPGPPMET-PWY	0	0	1000	0	Confidence level: 2	3.1.7.2
ORNCARBAMTRANSFER-RXN	L-ORNITHINE[c] + CARBAMOYL-P[c] -> L-CITRULLINE[c] + Pi[c] + PROTON[c]	METBUDRAFT_1243	ARGSYNBSUB-PWY	0	0	1000	0	Confidence level: 2	2.1.3.3
THIAZOLSYN3-RXN	THZ[c] + ATP[c] -> THZ-P[c] + ADP[c] + PROTON[c]		PWY-6897	0	0	1000	0	Confidence level: 0	2.7.1.50
N-CARBAMOYLPUTRESCINE-AMIDASE-RXN	CPD-597[c] + WATER[c] + PROTON[c] -> PUTRESCINE[c] + AMMONIA[c] + CARBON-DIOXIDE[c]	METBUDRAFT_0820	ARGDEG-III-PWY, PWY-43	0	0	1000	0	Confidence level: 2	3.5.1.53
SPERMINE-SYNTHASE-RXN	S-ADENOSYLMETHIONINAMINE[c] + SPERMIDINE[c] -> SPERMINE[c] + 5-METHYLTHIOADENOSINE[c] + PROTON[c]		POLYAMINSYN3-PWY	0	0	1000	0	Confidence level: 0	2.5.1.22
LIPIDXSYNTHESIS-RXN	OH-MYRISTOYL[c] + WATER[c] -> UMP[c] + BISOHMYR-GLUCOSAMINYL-1P[c] + 2 PROTON[c]	METBUDRAFT_3851	NAGLIPASYN-PWY	0	0	1000	0	Confidence level: 2	3.6.1.54
RXNN0B-93	GLUCOSAMINE-1P[c] + WATER[c] <=> GLUCOSAMINE[c] + Pi[c]			1	-1000	1000	0	Confidence level: 0
INOPHOSPHOR-RXN	INOSINE[c] + Pi[c] -> HYPOXANTHINE[c] + RIBOSE-1P[c]		SALVADEHYPOX-PWY	0	0	1000	0	Confidence level: 0	2.4.2.1
RXNN0B-69	CPDN0B-5[c] -> PYRUVATE[c] + PROTON[c]			0	0	1000	0	Confidence level: 0
HISTPRATPHYD-RXN	PHOSPHORIBOSYL-ATP[c] + WATER[c] -> PHOSPHORIBOSYL-AMP[c] + PPI[c] + PROTON[c]	METBUDRAFT_3038	HISTSYN-PWY	0	0	1000	0	Confidence level: 2	3.6.1.31
RXNN0B-2	CH4[p] + OXYGEN-MOLECULE[p] + Donor-H2[p] -> METOH[p] + WATER[p] + Acceptor[p]	METBUDRAFT_3703 METBUDRAFT_3704 METBUDRAFT_3705	PWYN0B-4	0	0	1000	0	Confidence level: 2	1.14.18.3
GTP-CYCLOHYDRO-II-RXN	GTP[c] + 3 WATER[c] -> DIAMINO-OH-PHOSPHORIBOSYLAMINO-PYR[c] + FORMATE[c] + PPI[c] + 2 PROTON[c]	METBUDRAFT_2086 METBUDRAFT_2418 METBUDRAFT_3779	RIBOSYN2-PWY	0	0	1000	0	Confidence level: 2	3.5.4.25
RXN3O-102	2-HEXAPRENYL-3-METHYL-5-HYDROXY-6-METHOX[c] + S-ADENOSYLMETHIONINE[c] <=> UBIQUINOL-30[c] + ADENOSYL-HOMO-CYS[c] + PROTON[c]	METBUDRAFT_0508		1	-1000	1000	0	Confidence level: 2	2.1.1.64
GLYCDEH-RXN	GLYCEROL[c] + NAD[c] -> DIHYDROXYACETONE[c] + NADH[c] + PROTON[c]		PWY-6131	0	0	1000	0	Confidence level: 0	1.1.1.6
GLURS-RXN	GLT-tRNAs[c] + GLT[c] + ATP[c] + PROTON[c] -> Charged-GLT-tRNAs[c] + PPI[c] + AMP[c]	METBUDRAFT_1998	TRNA-CHARGING-PWY, PWY-5188	0	0	1000	0	Confidence level: 2	6.1.1.17
RXN0-2381	INDOLE-3-GLYCEROL-P[c] -> INDOLE[c] + GAP[c]			0	0	1000	0	Confidence level: 0	4.1.2.8
FRUCTOSE-6-PHOSPHATE-PHOSPHOKETOLASE-RXN	FRUCTOSE-6P[c] + Pi[c] -> ERYTHROSE-4P[c] + ACETYL-P[c] + WATER[c]	METBUDRAFT_1551		0	0	1000	0	Confidence level: 2	4.1.2.22
RXN-9361	CPD-12119[c] + S-ADENOSYLMETHIONINE[c] <=> CPD-12127[c] + ADENOSYL-HOMO-CYS[c] + PROTON[c]	METBUDRAFT_3792		1	-1000	1000	0	Confidence level: 2	2.1.1.163
DUTP-PYROP-RXN	DUTP[c] + WATER[c] -> DUMP[c] + PPI[c] + PROTON[c]	METBUDRAFT_2980	PWY0-166	0	0	1000	0	Confidence level: 2	3.6.1.23
RXN-8748	CPD-8978[c] + WATER[c] <=> ETOH[c] + Pi[c]	METBUDRAFT_3769		1	-1000	1000	0	Confidence level: 2	3.1.3.1
DIHYDRODIPICSYN-RXN	L-ASPARTATE-SEMIALDEHYDE[c] + PYRUVATE[c] -> CPD-14443[c] + WATER[c] + PROTON[c]	METBUDRAFT_0680	DAPLYSINESYN-PWY	0	0	1000	0	Confidence level: 2	4.3.3.7
RXN-7700	CPD-7035[c] + NAD[c] <=> PHENYLACETALDEHYDE[c] + NADH[c] + PROTON[c]	METBUDRAFT_1594 METBUDRAFT_2417		1	-1000	1000	0	Confidence level: 2	1.1.1.1
D-ALANINE-AMINOTRANSFERASE-RXN	D-ALANINE[c] + 2-KETOGLUTARATE[c] <=> D-GLT[c] + PYRUVATE[c]	METBUDRAFT_2389		1	-1000	1000	0	Confidence level: 2	2.6.1.21
RXN-5184	N-ACETYL-AAA-SEMIALDEHYDE[c] + GLT[c] -> N-ACETYL-L-LYSINE[c] + 2-KETOGLUTARATE[c]		PWY-3081	0	0	1000	0	Confidence level: 0
CATAL-RXN	2 HYDROGEN-PEROXIDE[c] -> OXYGEN-MOLECULE[c] + 2 WATER[c]	METBUDRAFT_0192	DETOX1-PWY	0	0	1000	0	Confidence level: 2	1.11.1.6
RXN-13656	CPD-13380[c] + GLT[c] + PROTON[c] -> 2-KETOGLUTARATE[c] + CPD-14678[c]		PWY-7104	0	0	1000	0	Confidence level: 0	2.6.1.-
ASNSYNA-RXN	L-ASPARTATE[c] + AMMONIA[c] + ATP[c] -> ASN[c] + PPI[c] + AMP[c]	METBUDRAFT_0851 METBUDRAFT_1736 METBUDRAFT_1764	ASPARAGINESYN-PWY, ASPARAGINE-BIOSYNTHESIS	0	0	1000	0	Confidence level: 2	6.3.1.1
RXN-12928	CPD-13381[c] -> CPD-13954[c]		PWY-6974	0	0	1000	0	Confidence level: 0	5.1.3.-
AKBLIG-RXN	AMINO-OXOBUT[c] + CO-A[c] + PROTON[c] -> GLY[c] + ACETYL-COA[c]	METBUDRAFT_1420	THREONINE-DEG2-PWY	0	0	1000	0	Confidence level: 2	2.3.1.29
RXN-12611	CPD-13575[c] + AMINO-HYDROXYMETHYL-METHYLPYRIMIDINE-PP[c] + 2 PROTON[c] -> THIAMINE-P[c] + PPI[c] + CARBON-DIOXIDE[c]	METBUDRAFT_4238	PWY-6894	0	0	1000	0	Confidence level: 2	2.5.1.3
ACYLNEURAMINATE-CYTIDYLYLTRANSFERASE-RXN	CPD-1119[c] + CTP[c] + PROTON[c] -> CPD-189[c] + PPI[c]	METBUDRAFT_3867		0	0	1000	0	Confidence level: 2	2.7.7.43
RXN-12193	MALTOSE[c] <=> Maltodextrins[c] + ALPHA-GLUCOSE[c]	METBUDRAFT_3837		1	-1000	1000	0	Confidence level: 2	2.4.1.25
6PFRUCTPHOS-RXN	FRUCTOSE-6P[c] + PPI[c] <=> FRUCTOSE-16-DIPHOSPHATE[c] + Pi[c] + PROTON[c]	METBUDRAFT_2291	PWYN0B-24	1	-1000	1000	0	Confidence level: 2	2.7.1.90
RXN-11578	16S-rRNA-guanine-527[c] + S-ADENOSYLMETHIONINE[c] <=> 16S-rRNA-N7-methylguanine527[c] + ADENOSYL-HOMO-CYS[c]	METBUDRAFT_2676		1	-1000	1000	0	Confidence level: 2	2.1.1.170
4.2.1.93-RXN	CPD-653[c] + ATP[c] -> Pi[c] + ADP[c] + NADH[c] + PROTON[c]		PWY-6938	0	0	1000	0	Confidence level: 0	4.2.1.93
RXN-11046	Demethylmenaquinones[c] + S-ADENOSYLMETHIONINE[c] <=> Menaquinones[c] + ADENOSYL-HOMO-CYS[c] + PROTON[c]	METBUDRAFT_3792		1	-1000	1000	0	Confidence level: 2	2.1.1.163
3.4.17.14-RXN	C3[c] + WATER[c] <=> CPD-12258[c] + D-ALANINE[c]	METBUDRAFT_0530 METBUDRAFT_0871		1	-1000	1000	0	Confidence level: 2	3.4.17.14
RIBULP3EPIM-RXN	XYLULOSE-5-PHOSPHATE[c] -> RIBULOSE-5P[c]		PWYN0B-31	0	0	1000	0	Confidence level: 0	5.1.3.1
2.7.1.148-RXN	4-CYTIDINE-5-DIPHOSPHO-2-C[c] + ATP[c] -> 2-PHOSPHO-4-CYTIDINE-5-DIPHOSPHO-2-C-MET[c] + ADP[c] + PROTON[c]	METBUDRAFT_2370	NONMEVIPP-PWY	0	0	1000	0	Confidence level: 2	2.7.1.148
R322-RXN	CPD-662[c] + S-ADENOSYLMETHIONINE[c] + WATER[c] -> CPD-675[c] + ACET[c] + ADENOSYL-HOMO-CYS[c] + PROTON[c]		P381-PWY	0	0	1000	0	Confidence level: 0	2.1.1.152
2-ISOPROPYLMALATESYN-RXN	2-KETO-ISOVALERATE[c] + ACETYL-COA[c] + WATER[c] -> 3-CARBOXY-3-HYDROXY-ISOCAPROATE[c] + CO-A[c] + PROTON[c]	METBUDRAFT_2307	LEUSYN-PWY	0	0	1000	0	Confidence level: 2	2.3.3.13
1TRANSKETO-RXN	D-SEDOHEPTULOSE-7-P[c] + GAP[c] -> RIBOSE-5P[c] + XYLULOSE-5-PHOSPHATE[c]		PWYN0B-31	0	0	1000	0	Confidence level: 0	2.2.1.1
PSERTRANSAMPYR-RXN	3OH-4P-OH-ALPHA-KETOBUTYRATE[c] + GLT[c] -> 4-PHOSPHONOOXY-THREONINE[c] + 2-KETOGLUTARATE[c]	METBUDRAFT_0261	PYRIDOXSYN-PWY	0	0	1000	0	Confidence level: 2	2.6.1.52
UDP-NACMUR-ALA-LIG-RXN	UDP-N-ACETYLMURAMATE[c] + L-ALPHA-ALANINE[c] + ATP[c] -> CPD0-1456[c] + Pi[c] + ADP[c] + PROTON[c]	METBUDRAFT_3624	PWY-6387	0	0	1000	0	Confidence level: 2	6.3.2.8
PNPOXI-RXN	PYRIDOXINE-5P[c] + OXYGEN-MOLECULE[c] -> PYRIDOXAL_PHOSPHATE[c] + HYDROGEN-PEROXIDE[c]	METBUDRAFT_0018	PLPSAL-PWY, PYRIDOXSYN-PWY	0	0	1000	0	Confidence level: 2	1.4.3.5
PGLYCDEHYDROG-RXN	G3P[c] + NAD[c] -> 3-P-HYDROXYPYRUVATE[c] + NADH[c] + PROTON[c]	METBUDRAFT_4242	SERSYN-PWY	0	0	1000	0	Confidence level: 2	1.1.1.95
OHACYL-COA-DEHYDROG-RXN	L-3-HYDROXYACYL-COA[c] + NAD[c] -> 3-KETOACYL-COA[c] + NADH[c] + PROTON[c]	METBUDRAFT_3643		0	0	1000	0	Confidence level: 2	1.1.1.35
TETRAACYLDISACC4KIN-RXN	BISOHMYR-GLC[c] + ATP[c] -> LIPID-IV-A[c] + ADP[c] + PROTON[c]	METBUDRAFT_0775	NAGLIPASYN-PWY	0	0	1000	0	Confidence level: 2	2.7.1.130
METHYLENETHFDEHYDROG-NADP-RXN	METHYLENE-THF[c] + NADP[c] <=> 5-10-METHENYL-THF[c] + NADPH[c]	METBUDRAFT_1853	PWY-1722, 1CMET2-PWY	1	-1000	1000	0	Confidence level: 2	1.5.1.5
SHIKIMATE-KINASE-RXN	SHIKIMATE[c] + ATP[c] -> SHIKIMATE-5P[c] + ADP[c] + PROTON[c]	METBUDRAFT_2222 METBUDRAFT_2223	PWY-6163	0	0	1000	0	Confidence level: 2	2.7.1.71
LANOSTEROL-SYNTHASE-RXN	EPOXYSQUALENE[c] -> LANOSTEROL[c]	METBUDRAFT_4052	PWY-6132	0	0	1000	0	Confidence level: 2	5.4.99.7
RXNN0B-89	GLT[c] + ATP[c] + NADH[c] + PROTON[c] -> GLUTAMATE-1-SEMIALDEHYDE[c] + PPI[c] + AMP[c] + NAD[c]			0	0	1000	0	Confidence level: 0
IMIDPHOSDEHYD-RXN	D-ERYTHRO-IMIDAZOLE-GLYCEROL-P[c] -> IMIDAZOLE-ACETOL-P[c] + WATER[c]	METBUDRAFT_3043	HISTSYN-PWY	0	0	1000	0	Confidence level: 2	4.2.1.19
RXNN0B-61	ATP[c] + WATER[c] -> Pi[c] + ADP[c] + PROTON[c]			0	0	1000	0	Confidence level: 0
HISTIDINE-AMMONIA-LYASE-RXN	HIS[c] -> UROCANATE[c] + AMMONIA[c] + PROTON[c]	METBUDRAFT_2726		0	0	1000	0	Confidence level: 2	4.3.1.3
RXNN0B-102	2 OXYGEN-MOLECULE[c] + 4 Pi[c] + 4 ADP[c] + 2 NADH[c] + 10 PROTON[c] <=> 4 ATP[c] + 2 NAD[c] + 8 WATER[c]			1	-1000	1000	0	Confidence level: 0
GPPSYN-RXN	CPD-4211[c] + DELTA3-ISOPENTENYL-PP[c] -> GERANYL-PP[c] + PPI[c]	METBUDRAFT_4514	PWY-5122, PWY-5123	0	0	1000	0	Confidence level: 2	2.5.1.1
RXN0-882	2C-METH-D-ERYTHRITOL-CYCLODIPHOSPHATE[c] + 2 Reduced-ferredoxins[c] + PROTON[c] -> HYDROXY-METHYL-BUTENYL-DIP[c] + 2 Oxidized-ferredoxins[c] + WATER[c]	METBUDRAFT_1837	NONMEVIPP-PWY	0	0	1000	0	Confidence level: 2	1.17.7.1
GLUTRNAREDUCT-RXN	Charged-GLT-tRNAs[c] + NADPH[c] -> GLUTAMATE-1-SEMIALDEHYDE[c] + GLT-tRNAs[c] + NADP[c]	METBUDRAFT_1893 METBUDRAFT_1894 METBUDRAFT_2373	PWY-5188	0	0	1000	0	Confidence level: 2	1.2.1.70
RXN0-5224	HCO3[c] + PROTON[c] <=> WATER[c] + CARBON-DIOXIDE[c]	METBUDRAFT_1296 METBUDRAFT_2595 METBUDRAFT_3742		1	-1000	1000	0	Confidence level: 2	4.2.1.1
GLUCONOKIN-RXN	GLUCONATE[c] + ATP[c] -> CPD-2961[c] + ADP[c] + PROTON[c]	METBUDRAFT_0429	GLUCONSUPER-PWY	0	0	1000	0	Confidence level: 2	2.7.1.12
RXN0-1342	tRNA-with-7-aminomethyl-7-deazaguanine[c] + S-ADENOSYLMETHIONINE[c] -> tRNAs-containing-epoxy-quenosine[c] + ADENINE[c] + MET[c] + 2 PROTON[c]	METBUDRAFT_0639		0	0	1000	0	Confidence level: 2	2.4.99.17
FORMATETHFLIG-RXN	THF[c] + FORMATE[c] + ATP[c] <=> 10-FORMYL-THF[c] + Pi[c] + ADP[c]	METBUDRAFT_2212	PWY-1722, 1CMET2-PWY	1	-1000	1000	0	Confidence level: 2	6.3.4.3
RXN-9220	CPD-12116[c] + S-ADENOSYLMETHIONINE[c] <=> CPD-12124[c] + ADENOSYL-HOMO-CYS[c] + PROTON[c]	METBUDRAFT_3792	PWY-5849	1	-1000	1000	0	Confidence level: 2	2.1.1.163
DTDPGLUCOSEPP-RXN	TTP[c] + GLC-1-P[c] + PROTON[c] -> DTDP-D-GLUCOSE[c] + PPI[c]	METBUDRAFT_1741 METBUDRAFT_1783 METBUDRAFT_3876	PWY-6953, PWY-6974, PWY-6942, PWY-6976, PWY-6973, PWY-7104, DTDPRHAMSYN-PWY	0	0	1000	0	Confidence level: 2	2.7.7.24
RXN-8529	CPD-13339[c] -> CPD-8742[c]		PWY-6336	0	0	1000	0	Confidence level: 0	5.3.2.6
DIAMINOPIMEPIM-RXN	LL-DIAMINOPIMELATE[c] -> MESO-DIAMINOPIMELATE[c]	METBUDRAFT_0549	DAPLYSINESYN-PWY	0	0	1000	0	Confidence level: 2	5.1.1.7
RXN-7682	HYPOXANTHINE[c] + NAD[c] + WATER[c] <=> XANTHINE[c] + NADH[c] + PROTON[c]	METBUDRAFT_0446 METBUDRAFT_0447	SALVADEHYPOX-PWY	1	-1000	1000	0	Confidence level: 2	1.17.1.4
CPM-KDOSYNTH-RXN	KDO[c] + CTP[c] -> CMP-KDO[c] + PPI[c]	METBUDRAFT_0777	PWY-1269	0	0	1000	0	Confidence level: 2	2.7.7.38
RXN-5181	CPD-468[c] + ACETYL-COA[c] -> N2-ACETYL-ALPHA-AMIN[c] + CO-A[c] + PROTON[c]		PWY-3081	0	0	1000	0	Confidence level: 0	2.3.1.-
BRANCHED-CHAINAMINOTRANSFERVAL-RXN	2-KETO-ISOVALERATE[c] + GLT[c] -> VAL[c] + 2-KETOGLUTARATE[c]	METBUDRAFT_1717	VALSYN-PWY	0	0	1000	0	Confidence level: 2	2.6.1.42
ARGININE--TRNA-LIGASE-RXN	ARG-tRNAs[c] + ARG[c] + ATP[c] + PROTON[c] -> Charged-ARG-tRNAs[c] + PPI[c] + AMP[c]	METBUDRAFT_2968	TRNA-CHARGING-PWY	0	0	1000	0	Confidence level: 2	6.1.1.19
RXN-12839	DTDP-DEOH-DEOXY-GLUCOSE[c] -> CPD-13845[c]		PWY-6953	0	0	1000	0	Confidence level: 0	5.3.2.3
AICARSYN-RXN	P-RIBOSYL-4-SUCCCARB-AMINOIMIDAZOLE[c] -> AICAR[c] + FUM[c]	METBUDRAFT_0167	PWY-6123	0	0	1000	0	Confidence level: 2	4.3.2.2
ACONITATEDEHYDR-RXN	CIT[c] <=> CIS-ACONITATE[c] + WATER[c]	METBUDRAFT_1921 METBUDRAFT_3589	TCA	1	-1000	1000	0	Confidence level: 2
RXN-11865	5-carbo-me-ami-me-ur-34-tRNALeu[c] + S-ADENOSYLMETHIONINE[c] <=> 5-CarboxyMeAmMe-2-O-MeU34-tRNALeu[c] + ADENOSYL-HOMO-CYS[c] + PROTON[c]	METBUDRAFT_2590		1	-1000	1000	0	Confidence level: 2	2.1.1.207
6.3.1.10-RXN	CPD-691[c] + 1-AMINO-PROPAN-2-OL[c] + ATP[c] -> ADENOSYLCOBINAMIDE[c] + Pi[c] + ADP[c] + PROTON[c]	METBUDRAFT_2047		0	0	1000	0	Confidence level: 2	6.3.1.10
RXN-11451	METOH[p] + Acceptor[p] -> FORMALDEHYDE[p] + Donor-H2[p]		PWYN0B-4	0	0	1000	0	Confidence level: 0	1.1.99.37
4.1.1.77-RXN	CPD-8742[c] + PROTON[c] -> OXOPENTENOATE[c] + CARBON-DIOXIDE[c]		PWY-6336	0	0	1000	0	Confidence level: 0	4.1.1.77
RXN-10911	CPD-11878[c] + NAD[c] <=> DIHYDROXYPHENYLGLYCOLALDEHYDE[c] + NADH[c] + PROTON[c]	METBUDRAFT_1594 METBUDRAFT_2417		1	-1000	1000	0	Confidence level: 2	1.1.1.1
3-OCTAPRENYL-4-OHBENZOATE-DECARBOX-RXN	3-OCTAPRENYL-4-HYDROXYBENZOATE[c] + PROTON[c] -> 2-OCTAPRENYLPHENOL[c] + CARBON-DIOXIDE[c]	METBUDRAFT_1037	PWY-6708	0	0	1000	0	Confidence level: 2	4.1.1.-
RIBOFLAVINSYNREDUC-RXN	CPD-602[c] + NADPH[c] + PROTON[c] -> CPD-1086[c] + NADP[c]	METBUDRAFT_2089	RIBOSYN2-PWY	0	0	1000	0	Confidence level: 2	1.1.1.193
2.4.1.129-RXN	CPD-7695[c] -> Peptidoglycans[c] + UNDECAPRENYL-DIPHOSPHATE[c]	METBUDRAFT_1886 METBUDRAFT_3617	PEPTIDOGLYCANSYN-PWY	0	0	1000	0	Confidence level: 2	2.4.1.129
UROGENIIISYN-RXN	HYDROXYMETHYLBILANE[c] -> UROPORPHYRINOGEN-III[c] + WATER[c]	METBUDRAFT_4529	PWY-5189, PWY-5188	0	0	1000	0	Confidence level: 2	4.2.1.75
1.5.1.7-RXN	SACCHAROPINE[c] + NAD[c] + WATER[c] -> LYS[c] + 2-KETOGLUTARATE[c] + NADH[c] + PROTON[c]		LYSINE-AMINOAD-PWY	0	0	1000	0	Confidence level: 0	1.5.1.7
PRPPSYN-RXN	RIBOSE-5P[c] + ATP[c] -> PRPP[c] + AMP[c] + PROTON[c]	METBUDRAFT_2163 METBUDRAFT_2368	PWY0-662	0	0	1000	0	Confidence level: 2	2.7.6.1
TRYPSYN-RXN	SER[c] + INDOLE-3-GLYCEROL-P[c] -> TRP[c] + GAP[c] + WATER[c]	METBUDRAFT_0492 METBUDRAFT_0493	TRPSYN-PWY	0	0	1000	0	Confidence level: 2	4.2.1.20
PHOSPHOKETOLASE-RXN	XYLULOSE-5-PHOSPHATE[c] + Pi[c] -> ACETYL-P[c] + GAP[c] + WATER[c]	METBUDRAFT_0185		0	0	1000	0	Confidence level: 2	4.1.2.9
PEPSYNTH-RXN	ATP[c] + PYRUVATE[c] + WATER[c] -> PHOSPHO-ENOL-PYRUVATE[c] + AMP[c] + Pi[c] + 2 PROTON[c]	METBUDRAFT_0376	GLUCONEO-PWY	0	0	1000	0	Confidence level: 2	2.7.9.2
NITRATREDUCT-RXN	NITRATE[c] + Donor-H2[c] -> NITRITE[c] + Acceptor[c] + WATER[c]	METBUDRAFT_0604	PWY-5675-1	0	0	1000	0	Confidence level: 2	1.7.99.4
SULFITE-REDUCT-RXN	SO3[c] + 3 NADPH[c] + 5 PROTON[c] -> HS[c] + 3 NADP[c] + 3 WATER[c]	METBUDRAFT_2022 METBUDRAFT_2273 METBUDRAFT_3407 METBUDRAFT_3408	SO4ASSIM-PWY-1	0	0	1000	0	Confidence level: 2	1.8.1.2
METHANE-MONOOXYGENASE-RXN	CH4[c] + OXYGEN-MOLECULE[c] + NADH[c] + PROTON[c] -> METOH[c] + NAD[c] + WATER[c]	METBUDRAFT_1942 METBUDRAFT_1943 METBUDRAFT_1944 METBUDRAFT_1945 METBUDRAFT_1946 METBUDRAFT_1947 METBUDRAFT_2520	PWY-1641	0	0	1000	0	Confidence level: 2	1.14.13.25
SERINE--TRNA-LIGASE-RXN	SER-tRNAs[c] + SER[c] + ATP[c] + PROTON[c] -> Charged-SER-tRNAs[c] + PPI[c] + AMP[c]	METBUDRAFT_4233	TRNA-CHARGING-PWY	0	0	1000	0	Confidence level: 2	6.1.1.11
L-ASPARTATE-OXID-RXN	L-ASPARTATE[c] + OXYGEN-MOLECULE[c] -> IMINOASPARTATE[c] + HYDROGEN-PEROXIDE[c] + PROTON[c]	METBUDRAFT_2547	PYRIDNUCSYN-PWY	0	0	1000	0	Confidence level: 2	1.4.3.16
RXNN0B-85	S-ADENOSYL-4-METHYLTHIO-2-OXOBUTANOATE[c] + GLN[c] + NADH[c] + PROTON[c] <=> GLT[c] + S-ADENOSYLMETHIONINE[c] + NAD[c]			1	-1000	1000	0	Confidence level: 0
HYDROXYPYRUVATE-REDUCTASE-RXN	OH-PYR[c] + NADH-P-OR-NOP[c] + PROTON[c] -> GLYCERATE[c] + NAD-P-OR-NOP[c]	METBUDRAFT_2210		0	0	1000	0	Confidence level: 2	1.1.1.81
RXNN0B-44	2 OXYGEN-MOLECULE[c] + 5 Pi[c] + 5 ADP[c] + 2 NADH[c] + 11 PROTON[c] -> 5 ATP[c] + 2 NAD[c] + 9 WATER[c]			0	0	1000	0	Confidence level: 0
HISTAMINOTRANS-RXN	IMIDAZOLE-ACETOL-P[c] + GLT[c] -> L-HISTIDINOL-P[c] + 2-KETOGLUTARATE[c]	METBUDRAFT_0263 METBUDRAFT_2501	HISTSYN-PWY	0	0	1000	0	Confidence level: 2	2.6.1.9
RXN66-321	5-ALPHA-CHOLESTA-724-DIEN-3-BETA-OL[c] + NADPH[c] + PROTON[c] <=> CPD-4186[c] + NADP[c]	METBUDRAFT_3340		1	-1000	1000	0	Confidence level: 2	1.3.1.72
GLYRIBONUCSYN-RXN	5-P-BETA-D-RIBOSYL-AMINE[c] + GLY[c] + ATP[c] -> 5-PHOSPHO-RIBOSYL-GLYCINEAMIDE[c] + Pi[c] + ADP[c] + PROTON[c]	METBUDRAFT_0584 METBUDRAFT_1780	PWY-6121	0	0	1000	0	Confidence level: 2	6.3.4.13
RXN0-6973	CPD-3744[c] + FMNH2[c] + OXYGEN-MOLECULE[c] -> BUTANAL[c] + SO3[c] + FMN[c] + WATER[c] + 2 PROTON[c]	METBUDRAFT_2581		0	0	1000	0	Confidence level: 2	1.14.14.5
GLUTDEHYD-RXN	AMMONIA[c] + 2-KETOGLUTARATE[c] + NADPH[c] + 2 PROTON[c] -> GLT[c] + NADP[c] + WATER[c]	METBUDRAFT_2021	PWY-5675-1, GLUTSYNIII-PWY, GLUTSYN-PWY, GLUTAMINEFUM-PWY	0	0	1000	0	Confidence level: 2	1.4.1.4
RXN0-5184	Pi[c] <=> 1-4-alpha-D-Glucan[c] + GLC-1-P[c]	METBUDRAFT_0220 METBUDRAFT_2184 METBUDRAFT_2591 METBUDRAFT_3169		1	-1000	1000	0	Confidence level: 2	2.4.1.1
GLUC1PADENYLTRANS-RXN	GLC-1-P[c] + ATP[c] + PROTON[c] -> ADP-D-GLUCOSE[c] + PPI[c]	METBUDRAFT_3835	PWYN0B-20	0	0	1000	0	Confidence level: 2	2.7.7.27
RXN-9952	CPD-2961[c] + NAD-P-OR-NOP[c] -> RIBULOSE-5P[c] + NADH-P-OR-NOP[c] + CARBON-DIOXIDE[c]	METBUDRAFT_3313	PWYN0B-32	0	0	1000	0	Confidence level: 2	1.1.1.44
FGAMSYN-RXN	5-P-RIBOSYL-N-FORMYLGLYCINEAMIDE[c] + GLN[c] + ATP[c] + WATER[c] -> 5-PHOSPHORIBOSYL-N-FORMYLGLYCINEAMIDINE[c] + GLT[c] + Pi[c] + ADP[c] + PROTON[c]	METBUDRAFT_0682	PWY-6121	0	0	1000	0	Confidence level: 2	6.3.5.3
RXN-9190	ALL-TRANS-HEPTAPRENYL-DIPHOSPHATE[c] + DIHYDROXYNAPHTHOATE[c] + PROTON[c] -> CPD-12117[c] + PPI[c] + CARBON-DIOXIDE[c]		PWY-5839	0	0	1000	0	Confidence level: 0	2.5.1.74
DTDPDEHYDRHAMEPIM-RXN	DTDP-DEOH-DEOXY-GLUCOSE[c] -> DTDP-DEOH-DEOXY-MANNOSE[c]	METBUDRAFT_1742 METBUDRAFT_3875 METBUDRAFT_4017	DTDPRHAMSYN-PWY	0	0	1000	0	Confidence level: 2	5.1.3.13
RXN-821	PRO[c] + Acceptor[c] -> L-DELTA1-PYRROLINE_5-CARBOXYLATE[c] + Donor-H2[c] + PROTON[c]	METBUDRAFT_0361	PROUT-PWY	0	0	1000	0	Confidence level: 2	1.5.99.8
DGDPKIN-RXN	DGDP[c] + ATP[c] -> DGTP[c] + ADP[c]	METBUDRAFT_3687	PWY-6125	0	0	1000	0	Confidence level: 2	2.7.4.6
RXN-7607	IMP[c] + WATER[c] -> INOSINE[c] + Pi[c]	METBUDRAFT_0479 METBUDRAFT_2029 METBUDRAFT_2755 METBUDRAFT_4000		0	0	1000	0	Confidence level: 2	3.1.3.5
COBALAMINSYN-RXN	ALPHA-RIBAZOLE[c] + ADENOSYLCOBINAMIDE-GDP[c] + PROTON[c] -> ADENOSYLCOBALAMIN[c] + GMP[c]	METBUDRAFT_2060	PWY-5508	0	0	1000	0	Confidence level: 2	2.7.8.26
RXN-2883	METHYLENETETRAHYDROMETHANOPTERIN[c] + NAD-P-OR-NOP[c] -> METHENYLTETRAHYDROMETHANOPTERIN[c] + NADH-P-OR-NOP[c]	METBUDRAFT_1893 METBUDRAFT_1894	PWY-1723	0	0	1000	0	Confidence level: 2	1.5.1.-
RXN-13313	CPDQT-520[c] + WATER[c] <=> CPD-2183[c] + Pi[c]			1	-1000	1000	0	Confidence level: 0	3.1.3.27
AMYLOSUCRASE-RXN	SUCROSE[c] <=> FRU[c] + 1-4-alpha-D-Glucan[c]	METBUDRAFT_2512		1	-1000	1000	0	Confidence level: 2	2.4.1.4
RXN-12769	Donor-H2[c] + CPD-472[c] + S-ADENOSYLMETHIONINE[c] -> CH33ADO[c] + CPD-13777[c] + MET[c] + Acceptor[c] + AMMONIUM[c] + PROTON[c]		PWY-6942	0	0	1000	0	Confidence level: 0	4.3.1.-
ADENYLYLSULFKIN-RXN	APS[c] + ATP[c] -> PAPS[c] + ADP[c] + PROTON[c]	METBUDRAFT_0143 METBUDRAFT_1568	SO4ASSIM-PWY-1	0	0	1000	0	Confidence level: 2	2.7.1.25
RXN-12490	CPD0-2244[c] + NAD[c] <=> CPD0-2123[c] + NADH[c] + PROTON[c]	METBUDRAFT_3643		1	-1000	1000	0	Confidence level: 0	1.1.1.35
ACETYL-COA-CARBOXYLTRANSFER-RXN	HCO3[c] + ATP[c] + ACETYL-COA[c] -> Pi[c] + ADP[c] + MALONYL-COA[c] + PROTON[c]	METBUDRAFT_0494 METBUDRAFT_0593 METBUDRAFT_3928	PWY-4381	0	0	1000	0	Confidence level: 2	6.4.1.2
RXN-11832	CMP[c] + ATP[c] <=> CDP[c] + ADP[c]			1	-1000	1000	0	Confidence level: 0	2.7.4.14/2.7.4.25
5.4.2.10-RXN	D-GLUCOSAMINE-6-P[c] -> GLUCOSAMINE-1P[c]	METBUDRAFT_1230	UDPNAGSYN-PWY	0	0	1000	0	Confidence level: 2	5.4.2.10
RXN-11351	2 CPD-12310[c] + 3 WATER[c] <=> CPD-12311[c] + UNDECAPRENYL-DIPHOSPHATE[c] + 4 D-ALANINE[c] + PROTON[c]	METBUDRAFT_0530 METBUDRAFT_0871 METBUDRAFT_2388		1	-1000	1000	0	Confidence level: 2	3.4.16.4
3PGAREARR-RXN	G3P[c] <=> 2-PG[c]	METBUDRAFT_1167	PWYN0B-24, GLUCONEO-PWY	1	-1000	1000	0	Confidence level: 2	5.4.2.1
RXN-10708	CPD-11529[c] + WATER[c] <=> CPD-731[c] + CO-A[c] + PROTON[c]	METBUDRAFT_1855		1	-1000	1000	0	Confidence level: 2	3.1.2.20
3-DEHYDROQUINATE-SYNTHASE-RXN	3-DEOXY-D-ARABINO-HEPTULOSONATE-7-P[c] -> DEHYDROQUINATE[c] + Pi[c]	METBUDRAFT_2221	PWY-6164	0	0	1000	0	Confidence level: 2	4.2.3.4
RIBOFLAVIN-SYN-RXN	2 DIMETHYL-D-RIBITYL-LUMAZINE[c] + PROTON[c] -> AMINO-RIBOSYLAMINO-1H-3H-PYR-DIONE[c] + RIBOFLAVIN[c]	METBUDRAFT_2087	RIBOSYN2-PWY	0	0	1000	0	Confidence level: 2	2.5.1.9
2.1.1.64-RXN	CPD-7158[c] + S-ADENOSYLMETHIONINE[c] <=> CPD-9957[c] + ADENOSYL-HOMO-CYS[c] + PROTON[c]	METBUDRAFT_0508		1	-1000	1000	0	Confidence level: 2	2.1.1.64
R103-RXN	N-ACETYL-L-24-DIAMINOBUTANOATE[c] -> ECTOINE[c] + WATER[c]	METBUDRAFT_2400	P101-PWY	0	0	1000	0	Confidence level: 2	4.2.1.108
URACIL-PRIBOSYLTRANS-RXN	URACIL[c] + PRPP[c] <=> UMP[c] + PPI[c]	METBUDRAFT_3345	PWY-7183	1	-1000	1000	0	Confidence level: 2	2.4.2.9
1.3.1.54-RXN	CPD-675[c] + NADPH[c] + PROTON[c] -> CPD-679[c] + NADP[c]		P381-PWY	0	0	1000	0	Confidence level: 0	1.3.1.54
PROTOHEMEFERROCHELAT-RXN	PROTOPORPHYRIN_IX[c] + FE__43__2[c] -> PROTOHEME[c] + 2 PROTON[c]	METBUDRAFT_2713	HEME-BIOSYNTHESIS-II, HEMESYN2-PWY, PWY0-1415	0	0	1000	0	Confidence level: 2	4.99.1.1
TRANSALDOL-RXN	ERYTHROSE-4P[c] + FRUCTOSE-6P[c] -> D-SEDOHEPTULOSE-7-P[c] + GAP[c]		PWYN0B-31	0	0	1000	0	Confidence level: 0	2.2.1.2
PHOSPHASERSYN-RXN	CPD-12815[c] + SER[c] -> CMP[c] + CPD-12817[c] + 2 PROTON[c]	METBUDRAFT_2308 METBUDRAFT_2406 METBUDRAFT_2812	PWYN0B-39	0	0	1000	0	Confidence level: 2	2.7.8.8
THYM-PHOSPH-RXN	THYMIDINE[c] + Pi[c] <=> DEOXY-RIBOSE-1P[c] + THYMINE[c]	METBUDRAFT_2164		1	-1000	1000	0	Confidence level: 2	2.4.2.4
PANTOATE-BETA-ALANINE-LIG-RXN	B-ALANINE[c] + L-PANTOATE[c] + ATP[c] -> PANTOTHENATE[c] + PPI[c] + AMP[c] + PROTON[c]	METBUDRAFT_2467	PANTO-PWY	0	0	1000	0	Confidence level: 2	6.3.2.1
NICONUCADENYLYLTRAN-RXN	NICOTINATE_NUCLEOTIDE[c] + ATP[c] + PROTON[c] -> DEAMIDO-NAD[c] + PPI[c]	METBUDRAFT_0386	PYRIDNUCSAL-PWY, PYRIDNUCSYN-PWY	0	0	1000	0	Confidence level: 2	2.7.7.18
SUCROSE-PHOSPHATE-SYNTHASE-RXN	UDP-GLUCOSE[c] + FRUCTOSE-6P[c] -> SUCROSE-6P[c] + UDP[c] + PROTON[c]	METBUDRAFT_2515	PWYN0B-19	0	0	1000	0	Confidence level: 2	2.4.1.14
MALTOSE-SYNTHASE-RXN	2 GLC-1-P[c] + WATER[c] -> MALTOSE[c] + 2 Pi[c]			0	0	1000	0	Confidence level: 0	2.4.1.139
SAMDECARB-RXN	S-ADENOSYLMETHIONINE[c] + PROTON[c] -> S-ADENOSYLMETHIONINAMINE[c] + CARBON-DIOXIDE[c]	METBUDRAFT_3102	BSUBPOLYAMSYN-PWY	0	0	1000	0	Confidence level: 2	4.1.1.50
KDOTRANS-RXN	CMP-KDO[c] + LIPID-IV-A[c] -> KDO-LIPID-IVA[c] + CMP[c] + PROTON[c]	METBUDRAFT_0089	KDOSYN-PWY	0	0	1000	0	Confidence level: 2	2.4.99.12
RXNN0B-79	ARABINOSE-5P[c] + WATER[c] -> D-ARABINOSE[c] + Pi[c]			0	0	1000	0	Confidence level: 0
HOMSUCTRAN-RXN	HOMO-SER[c] + SUC-COA[c] -> O-SUCCINYL-L-HOMOSERINE[c] + CO-A[c]	METBUDRAFT_3979	HOMOSER-METSYN-PWY	0	0	1000	0	Confidence level: 2	2.3.1.46
RXNN0B-36	AMP[c] + WATER[c] -> IMP[c] + AMMONIA[c]			0	0	1000	0	Confidence level: 0	3.5.4.6
H2PTEROATESYNTH-RXN	P-AMINO-BENZOATE[c] + DIHYDROPTERIN-CH2OH-PP[c] -> 7-8-DIHYDROPTEROATE[c] + PPI[c]	METBUDRAFT_0674	PWY-6614	0	0	1000	0	Confidence level: 2	2.5.1.15
RXN66-28	DESMOSTEROL-CPD[c] + NADPH[c] + PROTON[c] <=> CHOLESTEROL[c] + NADP[c]	METBUDRAFT_3340		1	-1000	1000	0	Confidence level: 2	1.3.1.72
GLYOHMETRANS-RXN	THF[c] + SER[c] <=> METHYLENE-THF[c] + GLY[c] + WATER[c]	METBUDRAFT_2211	GLYSYN-PWY, 1CMET2-PWY	1	-1000	1000	0	Confidence level: 2	2.1.2.1
GLUTATHIONE-REDUCT-NADPH-RXN	OXIDIZED-GLUTATHIONE[c] + NADPH[c] + PROTON[c] -> 2 GLUTATHIONE[c] + NADP[c]	METBUDRAFT_1987	GLUT-REDOX-PWY, PWY-4081	0	0	1000	0	Confidence level: 2	1.8.1.7
RXN0-4141	HYDROGEN-MOLECULE[c] + Acceptor[c] <=> Donor-H2[c]	METBUDRAFT_3487 METBUDRAFT_3488	P283-PWY	1	-1000	1000	0	Confidence level: 2	1.12.99.6
GDPKIN-RXN	GDP[c] + ATP[c] -> GTP[c] + ADP[c]	METBUDRAFT_3687	PPGPPMET-PWY, PWY-6125	0	0	1000	0	Confidence level: 2	2.7.4.6
RXN-9510	FMNH2[c] + NAD[c] <=> FMN[c] + NADH[c] + 2 PROTON[c]	METBUDRAFT_3463		1	-1000	1000	0	Confidence level: 2	1.5.1.42
F16ALDOLASE-RXN	FRUCTOSE-16-DIPHOSPHATE[c] <=> GAP[c] + DIHYDROXY-ACETONE-PHOSPHATE[c]		PWYN0B-24, GLUCONEO-PWY	1	-1000	1000	0	Confidence level: 0	4.1.2.13
RXN-8991	CPD-9451[c] + WATER[c] -> 2-D-THREO-HYDROXY-3-CARBOXY-ISOCAPROATE[c]	METBUDRAFT_3812 METBUDRAFT_3813	LEUSYN-PWY	0	0	1000	0	Confidence level: 2
DIMETHUROPORDEHYDROG-RXN	DIHYDROSIROHYDROCHLORIN[c] + NAD[c] -> SIROHYDROCHLORIN[c] + NADH[c] + 2 PROTON[c]	METBUDRAFT_0722	PWY-5194	0	0	1000	0	Confidence level: 2	1.3.1.76
RXN-8063	CPD-7592[c] + PROTON[c] <=> CPD-7425[c] + WATER[c]			1	-1000	1000	0	Confidence level: 0
DCTP-DEAM-RXN	DCTP[c] + WATER[c] -> DUTP[c] + AMMONIA[c]	METBUDRAFT_3451	PWY0-166	0	0	1000	0	Confidence level: 2	3.5.4.13
RXN-6261	R-1-AMINOPROPAN-2-YL-PHOSPHATE[c] + CPD-691[c] + ATP[c] -> ADENOSYLCOBINAMIDE-P[c] + Pi[c] + ADP[c] + PROTON[c]	METBUDRAFT_2047	PWY-5509, PWY-5508	0	0	1000	0	Confidence level: 2	6.3.1.10
CITSYN-RXN	OXALACETIC_ACID[c] + ACETYL-COA[c] + WATER[c] -> CIT[c] + CO-A[c] + PROTON[c]		TCA	0	0	1000	0	Confidence level: 0	2.3.3.1
RXN-14014	CPD-14443[c] + NADPH[c] + PROTON[c] -> DELTA1-PIPERIDEINE-2-6-DICARBOXYLATE[c] + NADP[c] + WATER[c]		DAPLYSINESYN-PWY	0	0	1000	0	Confidence level: 0	1.17.1.8
ASPCARBTRANS-RXN	L-ASPARTATE[c] + CARBAMOYL-P[c] -> CARBAMYUL-L-ASPARTATE[c] + Pi[c] + PROTON[c]	METBUDRAFT_3344	PWY-5686-1	0	0	1000	0	Confidence level: 2	2.1.3.2
RXN-12941	CPD-13985[c] + S-ADENOSYLMETHIONINE[c] -> CPD-13970[c] + ADENOSYL-HOMO-CYS[c] + PROTON[c]		PWY-6976	0	0	1000	0	Confidence level: 0	2.1.1.-
AMP-DEPHOSPHORYLATION-RXN	AMP[c] + WATER[c] -> ADENOSINE[c] + Pi[c]	METBUDRAFT_0479 METBUDRAFT_2029 METBUDRAFT_2755 METBUDRAFT_4000	SALVADEHYPOX-PWY	0	0	1000	0	Confidence level: 2	3.1.3.5
ADENYL-KIN-RXN	AMP[c] + ATP[c] -> 2 ADP[c]	METBUDRAFT_3811	PWY-6126	0	0	1000	0	Confidence level: 2	2.7.4.3
RXN-12405	CPD-13380[c] + NADH-P-OR-NOP[c] + 2 PROTON[c] -> CPD-13381[c] + NAD-P-OR-NOP[c]		PWY-6974, PWY-6973	0	0	1000	0	Confidence level: 0	1.17.1.-
ACETOLACTSYN-RXN	2 PYRUVATE[c] + PROTON[c] -> 2-ACETO-LACTATE[c] + CARBON-DIOXIDE[c]	METBUDRAFT_2310 METBUDRAFT_2311	VALSYN-PWY	0	0	1000	0	Confidence level: 2	2.2.1.6
RXN-11638	16S-rRNA-cytidine1402[c] + S-ADENOSYLMETHIONINE[c] <=> 16S-rRNA-N4-methylcytidine1402[c] + ADENOSYL-HOMO-CYS[c] + PROTON[c]	METBUDRAFT_3615		1	-1000	1000	0	Confidence level: 2	2.1.1.199
5-OXOPROLINASE-ATP-HYDROLYSING-RXN	GLT[c] + Pi[c] + ADP[c] + PROTON[c] -> 5-OXOPROLINE[c] + ATP[c] + 2 WATER[c]	METBUDRAFT_1198		0	0	1000	0	Confidence level: 2	3.5.2.9
RXN-11302	2 CPD-12231[c] + 4 WATER[c] -> CPD-12261[c] + UNDECAPRENYL-DIPHOSPHATE[c] + 4 D-ALANINE[c] + PROTON[c]	METBUDRAFT_0530 METBUDRAFT_0871 METBUDRAFT_2388	PEPTIDOGLYCANSYN-PWY	0	0	1000	0	Confidence level: 2	3.4.16.4
RXN-10699	CPD-11520[c] + CO-A[c] -> CPD-11521[c] + ACETYL-COA[c]	METBUDRAFT_3644		0	0	1000	0	Confidence level: 2	2.3.1.16
2TRANSKETO-RXN	GAP[c] + FRUCTOSE-6P[c] -> XYLULOSE-5-PHOSPHATE[c] + ERYTHROSE-4P[c]		PWYN0B-31	0	0	1000	0	Confidence level: 0	2.2.1.1
R83-RXN	2-HYDROXY-3-KETO-5-METHYLTHIO-1-PHOSPHOP[c] + WATER[c] -> CPD-85[c] + Pi[c]	METBUDRAFT_1801	PWY-6755	0	0	1000	0	Confidence level: 2	3.1.3.87
2.1.1.132-RXN	CPD-679[c] + 2 S-ADENOSYLMETHIONINE[c] -> CPD-686[c] + 2 ADENOSYL-HOMO-CYS[c] + 2 PROTON[c] + CARBON-DIOXIDE[c]	METBUDRAFT_0728	P381-PWY	0	0	1000	0	Confidence level: 2	2.1.1.132
R10-RXN	RIBULOSE-5P[c] + FORMALDEHYDE[c] -> CPD-26[c]	METBUDRAFT_0862 METBUDRAFT_3232 METBUDRAFT_3236 METBUDRAFT_3240	ENTNER-DOUDOROFF-PWY-1, PWYN0B-24, PWYN0B-32	0	0	1000	0	Confidence level: 2	4.1.2.43
UDPNACETYLGLUCOSAMENOLPYRTRANS-RXN	UDP-N-ACETYL-D-GLUCOSAMINE[c] + PHOSPHO-ENOL-PYRUVATE[c] -> UDP-ACETYL-CARBOXYVINYL-GLUCOSAMINE[c] + Pi[c]	METBUDRAFT_2498	PWY-6387	0	0	1000	0	Confidence level: 2	2.5.1.7
1.1.1.271-RXN	GDP-4-DEHYDRO-6-DEOXY-D-MANNOSE[c] + NADPH[c] + PROTON[c] -> GUANOSINE_DIPHOSPHATE_FUCOSE[c] + NADP[c]	METBUDRAFT_2593	PWY-66	0	0	1000	0	Confidence level: 2	1.1.1.271
PREPHENATEDEHYDROG-RXN	PREPHENATE[c] + NAD[c] -> P-HYDROXY-PHENYLPYRUVATE[c] + NADH[c] + CARBON-DIOXIDE[c]	METBUDRAFT_0264	TYRSYN	0	0	1000	0	Confidence level: 2	1.3.1.12
PHOSNACMURPENTATRANS-RXN	CPD-9646[c] + C1[c] -> C5[c] + UMP[c]	METBUDRAFT_3620	PEPTIDOGLYCANSYN-PWY	0	0	1000	0	Confidence level: 2	2.7.8.13
THREONINE--TRNA-LIGASE-RXN	THR-tRNAs[c] + THR[c] + ATP[c] + PROTON[c] -> Charged-THR-tRNAs[c] + PPI[c] + AMP[c]	METBUDRAFT_1655	TRNA-CHARGING-PWY	0	0	1000	0	Confidence level: 2	6.1.1.3
P-PANTOCYSLIG-RXN	4-P-PANTOTHENATE[c] + CTP[c] + CYS[c] -> CMP[c] + R-4-PHOSPHOPANTOTHENOYL-L-CYSTEINE[c] + PPI[c] + PROTON[c]	METBUDRAFT_2981	COA-PWY	0	0	1000	0	Confidence level: 2	6.3.2.5
NADH-DEHYDROGENASE-RXN	Acceptor[c] + NADH[c] + PROTON[c] <=> Donor-H2[c] + NAD[c]	METBUDRAFT_1319 METBUDRAFT_2643		1	-1000	1000	0	Confidence level: 2	1.6.99.3
SUCCDIAMINOPIMDESUCC-RXN	N-SUCCINYLLL-2-6-DIAMINOPIMELATE[c] + WATER[c] -> LL-DIAMINOPIMELATE[c] + SUC[c]	METBUDRAFT_1351	DAPLYSINESYN-PWY	0	0	1000	0	Confidence level: 2	3.5.1.18
MALATE--COA-LIGASE-RXN	MAL[c] + ATP[c] + CO-A[c] <=> CPD-208[c] + Pi[c] + ADP[c]	METBUDRAFT_2196 METBUDRAFT_2197		1	-1000	1000	0	Confidence level: 2	6.2.1.9
ISPH2-RXN	HYDROXY-METHYL-BUTENYL-DIP[c] + NADH-P-OR-NOP[c] + PROTON[c] -> DELTA3-ISOPENTENYL-PP[c] + NAD-P-OR-NOP[c] + WATER[c]	METBUDRAFT_2613	NONMEVIPP-PWY	0	0	1000	0	Confidence level: 2	1.17.1.2
RXNN0B-75	CPD-12815[c] + GLYCEROL-3P[c] + WATER[c] -> L-1-PHOSPHATIDYL-GLYCEROL[c] + CMP[c] + Pi[c]			0	0	1000	0	Confidence level: 0
HOMOCYSMETB12-RXN	5-METHYL-THF[c] + HOMO-CYS[c] -> THF[c] + MET[c]	METBUDRAFT_3716	HOMOSER-METSYN-PWY, 1CMET2-PWY	0	0	1000	0	Confidence level: 2	2.1.1.13
RXNN0B-29	PYRUVATE[c] + CO-A[c] + NAD[c] -> ACETYL-COA[c] + NADH[c] + CARBON-DIOXIDE[c]			0	0	1000	0	Confidence level: 0	1.2.4.1
H2NEOPTERINALDOL-RXN	DIHYDRO-NEO-PTERIN[c] -> GLYCOLALDEHYDE[c] + AMINO-OH-HYDROXYMETHYL-DIHYDROPTERIDINE[c]	METBUDRAFT_3030	PWY-6147	0	0	1000	0	Confidence level: 2	4.1.2.25
RXN66-11	CPD-8606[c] + OXYGEN-MOLECULE[c] + NADPH[c] + PROTON[c] <=> CPD-8607[c] + NADP[c] + WATER[c]	METBUDRAFT_4054		1	-1000	1000	0	Confidence level: 2
GLYCOGENSYN-RXN	ADP-D-GLUCOSE[c] -> 1-4-alpha-D-Glucan[c] + ADP[c]	METBUDRAFT_3833 METBUDRAFT_3841	PWYN0B-20	0	0	1000	0	Confidence level: 2	2.4.1.21
RXN0-6259	PROTOPORPHYRINOGEN[c] + 3 Menaquinones[c] -> 3 Menaquinols[c] + PROTOPORPHYRIN_IX[c]		HEMESYN2-PWY	0	0	1000	0	Confidence level: 0	1.3.5.3
GLUTAMINE--TRNA-LIGASE-RXN	GLN-tRNAs[c] + GLN[c] + ATP[c] + PROTON[c] -> Charged-GLN-tRNAs[c] + PPI[c] + AMP[c]	METBUDRAFT_1951	TRNA-CHARGING-PWY	0	0	1000	0	Confidence level: 2	6.1.1.18
RXN0-305	OH-PYR[c] <=> TARTRONATE-S-ALD[c]	METBUDRAFT_1823		1	-1000	1000	0	Confidence level: 2	5.3.1.22
GAPOXNPHOSPHN-RXN	GAP[c] + Pi[c] + NAD[c] <=> DPG[c] + NADH[c] + PROTON[c]	METBUDRAFT_3636 METBUDRAFT_4523	PWYN0B-24, GLUCONEO-PWY	1	-1000	1000	0	Confidence level: 2	1.2.1.12
RXN-9383	CPD-10014[c] + S-ADENOSYLMETHIONINE[c] <=> CPD-10016[c] + ADENOSYL-HOMO-CYS[c] + PROTON[c]	METBUDRAFT_3933 METBUDRAFT_4023 METBUDRAFT_4026		1	-1000	1000	0	Confidence level: 2
ERYTH4PDEHYDROG-RXN	ERYTHROSE-4P[c] + NAD[c] + WATER[c] -> ERYTHRONATE-4P[c] + NADH[c] + 2 PROTON[c]		PYRIDOXSYN-PWY	0	0	1000	0	Confidence level: 0	1.2.1.72
RXN-8770	ADENOSYLCOBALAMIN-5-P[c] + WATER[c] -> ADENOSYLCOBALAMIN[c] + Pi[c]	METBUDRAFT_2061	PWY-5509, COBALSYN-PWY	0	0	1000	0	Confidence level: 2	3.1.3.73
DIHYDROOROT-RXN	CARBAMYUL-L-ASPARTATE[c] + PROTON[c] -> DI-H-OROTATE[c] + WATER[c]	METBUDRAFT_1185 METBUDRAFT_3343	PWY-5686-1	0	0	1000	0	Confidence level: 2	3.5.2.3
RXN-7913	DCMP[c] + ATP[c] -> DCDP[c] + ADP[c]	METBUDRAFT_0266		0	0	1000	0	Confidence level: 2	2.7.4.14
DAPASYN-RXN	8-AMINO-7-OXONONANOATE[c] + S-ADENOSYLMETHIONINE[c] -> S-ADENOSYL-4-METHYLTHIO-2-OXOBUTANOATE[c] + DIAMINONONANOATE[c]	METBUDRAFT_0459	PWY0-1507	0	0	1000	0	Confidence level: 2	2.6.1.62
RXN-5822	NADP[c] + WATER[c] <=> Pi[c] + NAD[c]		NADPHOS-DEPHOS-PWY	1	-1000	1000	0	Confidence level: 0	3.1.3.-
CHORISMATE-SYNTHASE-RXN	3-ENOLPYRUVYL-SHIKIMATE-5P[c] -> CHORISMATE[c] + Pi[c]	METBUDRAFT_0771	PWY-6163	0	0	1000	0	Confidence level: 2	4.2.3.5
RXN-13660	CPD-14682[c] + NADPH[c] + PROTON[c] -> CPD-14683[c] + NADP[c]		PWY-7104	0	0	1000	0	Confidence level: 0	1.1.1.-
ASPARTATE--TRNA-LIGASE-RXN	ASP-tRNAs[c] + L-ASPARTATE[c] + ATP[c] + PROTON[c] -> Charged-ASP-tRNAs[c] + PPI[c] + AMP[c]	METBUDRAFT_1183	TRNA-CHARGING-PWY	0	0	1000	0	Confidence level: 2	6.1.1.12
RXN-12932	CPD-13958[c] + NADPH[c] + PROTON[c] -> CPD-13957[c] + NADP[c]		PWY-6973	0	0	1000	0	Confidence level: 0	1.1.1.-
ALARACECAT-RXN	L-ALPHA-ALANINE[c] <=> D-ALANINE[c]	METBUDRAFT_1398		1	-1000	1000	0	Confidence level: 2	5.1.1.1
RXN-12726	CPD-678[c] + ACETYLSERINE[c] -> L-SELENOCYSTEINE[c] + ACET[c] + PROTON[c]	METBUDRAFT_0613 METBUDRAFT_1279		0	0	1000	0	Confidence level: 2	2.5.1.47
ADENOSYLHOMOCYSTEINASE-RXN	ADENOSYL-HOMO-CYS[c] + WATER[c] -> ADENOSINE[c] + HOMO-CYS[c]	METBUDRAFT_2209 METBUDRAFT_3021	METHIONINE-DEG1-PWY	0	0	1000	0	Confidence level: 2	3.3.1.1
RXN-12263	2 FARNESYL-PP[c] -> CPD-465[c] + PPI[c]	METBUDRAFT_4507	PWY-5670	0	0	1000	0	Confidence level: 2	2.5.1.-
ACETATE--COA-LIGASE-RXN	ACET[c] + ATP[c] + CO-A[c] -> PPI[c] + AMP[c] + ACETYL-COA[c]	METBUDRAFT_1565	PWY0-1313	0	0	1000	0	Confidence level: 2	6.2.1.1
RXN-11633	16S-rRNA-adenine1518-adenine1519[c] + 4 S-ADENOSYLMETHIONINE[c] <=> 16S-rRNA-N6-dimethyladenine1518-1519[c] + 4 ADENOSYL-HOMO-CYS[c] + 4 PROTON[c]	METBUDRAFT_2183		1	-1000	1000	0	Confidence level: 2	2.1.1.182
5-AMINOLEVULINIC-ACID-SYNTHASE-RXN	SUC-COA[c] + GLY[c] + PROTON[c] -> 5-AMINO-LEVULINATE[c] + CO-A[c] + CARBON-DIOXIDE[c]		PWY-5189	0	0	1000	0	Confidence level: 0	2.3.1.37
RXN-11245	CPD-12199[c] + NAD[c] <=> CPD-12200[c] + NADH[c] + PROTON[c]	METBUDRAFT_3643		1	-1000	1000	0	Confidence level: 2	1.1.1.35
2.8.1.6-RXN	DETHIOBIOTIN[c] + HS[c] + 2 S-ADENOSYLMETHIONINE[c] -> BIOTIN[c] + 2 CH33ADO[c] + 2 MET[c] + 2 PROTON[c]	METBUDRAFT_0305	PWY0-1507	0	0	1000	0	Confidence level: 2	2.8.1.6
R344-RXN	CPD-694[c] + ATP[c] -> CPD-690[c] + P3I[c]	METBUDRAFT_1422	PWY-5509, PWY-5508	0	0	1000	0	Confidence level: 2	2.5.1.17
2-OCTAPRENYLPHENOL-HYDROX-RXN	2-OCTAPRENYLPHENOL[c] + OXYGEN-MOLECULE[c] + NADPH[c] + PROTON[c] -> 2-OCTAPRENYL-6-HYDROXYPHENOL[c] + NADP[c] + WATER[c]	METBUDRAFT_3790	PWY-6708	0	0	1000	0	Confidence level: 2	1.14.13.-
PYRUVFORMLY-RXN	FORMATE[c] + ACETYL-COA[c] <=> PYRUVATE[c] + CO-A[c]			1	-1000	1000	0	Confidence level: 0	2.3.1.54
PYRIMSYN3-RXN	AMINO-HYDROXYMETHYL-METHYL-PYR-P[c] + ATP[c] -> AMINO-HYDROXYMETHYL-METHYLPYRIMIDINE-PP[c] + ADP[c]	METBUDRAFT_4239	PWY-6890, PWY-6910	0	0	1000	0	Confidence level: 2	2.7.4.7
UDPACYLGLCNACDEACETYL-RXN	UDP-OHMYR-ACETYLGLUCOSAMINE[c] + WATER[c] -> UDP-OHMYR-GLUCOSAMINE[c] + ACET[c]	METBUDRAFT_3630	NAGLIPASYN-PWY	0	0	1000	0	Confidence level: 2	3.5.1.108
PPPGPPHYDRO-RXN	GDP-TP[c] + WATER[c] -> GUANOSINE-5DP-3DP[c] + Pi[c] + PROTON[c]	METBUDRAFT_1721	PPGPPMET-PWY	0	0	1000	0	Confidence level: 2	3.6.1.40
PHOSACETYLTRANS-RXN	ACETYL-P[c] + CO-A[c] <=> Pi[c] + ACETYL-COA[c]	METBUDRAFT_1957	PWY-5485	1	-1000	1000	0	Confidence level: 2	2.3.1.8
OROPRIBTRANS-RXN	OROTATE[c] + PRPP[c] -> OROTIDINE-5-PHOSPHATE[c] + PPI[c]	METBUDRAFT_2956	PWY-5686-1	0	0	1000	0	Confidence level: 2	2.4.2.10
THIKIN-RXN	THIAMINE[c] + ATP[c] -> THIAMINE-P[c] + ADP[c] + PROTON[c]		PWY-6896	0	0	1000	0	Confidence level: 0	2.7.1.89
NACGLCTRANS-RXN	C5[c] + UDP-N-ACETYL-D-GLUCOSAMINE[c] -> C6[c] + UDP[c] + PROTON[c]	METBUDRAFT_3623	PEPTIDOGLYCANSYN-PWY	0	0	1000	0	Confidence level: 2	2.4.1.227
LUMAZINESYN-RXN	DIHYDROXY-BUTANONE-P[c] + AMINO-RIBOSYLAMINO-1H-3H-PYR-DIONE[c] -> DIMETHYL-D-RIBITYL-LUMAZINE[c] + Pi[c] + 2 WATER[c] + PROTON[c]	METBUDRAFT_2084	RIBOSYN2-PWY	0	0	1000	0	Confidence level: 2	2.5.1.78
RXNN0B-94	ATP[c] + PYRUVATE[c] + WATER[c] + CARBON-DIOXIDE[c] -> OXALACETIC_ACID[c] + Pi[c] + ADP[c] + 2 PROTON[c]			0	0	1000	0	Confidence level: 0	6.4.1.1
INORGPYROPHOSPHAT-RXN	PPI[c] + WATER[c] -> 2 Pi[c] + PROTON[c]	METBUDRAFT_2816 METBUDRAFT_2834 METBUDRAFT_4317		0	0	1000	0	Confidence level: 2	3.6.1.1
RXNN0B-70	CPDN0B-6[c] -> PYRUVATE[c] + PROTON[c]			0	0	1000	0	Confidence level: 0
HOMOACONITATE-HYDRATASE-RXN	HOMO-CIS-ACONITATE[c] + WATER[c] -> HOMO-I-CIT[c]		LYSINE-AMINOAD-PWY, PWY-3081	0	0	1000	0	Confidence level: 0	4.2.1.36
RXNN0B-21	3-5-ADP[c] + WATER[c] -> AMP[c] + Pi[c]			0	0	1000	0	Confidence level: 0	3.1.3.7
GTPPYPHOSKIN-RXN	GTP[c] + ATP[c] -> GDP-TP[c] + AMP[c]	METBUDRAFT_2633	PPGPPMET-PWY	0	0	1000	0	Confidence level: 2	2.7.6.5
RXN3O-127	ALLYSINE[c] + GLT[c] + NADPH[c] + PROTON[c] -> SACCHAROPINE[c] + NADP[c] + WATER[c]		LYSINE-AMINOAD-PWY	0	0	1000	0	Confidence level: 0	1.5.1.10
GLYCERATE-DEHYDROGENASE-RXN	OH-PYR[c] + NADH[c] + PROTON[c] -> GLYCERATE[c] + NAD[c]			0	0	1000	0	Confidence level: 0	1.1.1.29
RXN0-5405	2 C6[c] -> CPD-12231[c] + UNDECAPRENYL-DIPHOSPHATE[c] + PROTON[c]	METBUDRAFT_0525 METBUDRAFT_1886 METBUDRAFT_3617	PEPTIDOGLYCANSYN-PWY	0	0	1000	0	Confidence level: 2	2.4.1.129
GLUTAMATE-N-ACETYLTRANSFERASE-RXN	N-ALPHA-ACETYLORNITHINE[c] + GLT[c] -> L-ORNITHINE[c] + ACETYL-GLU[c]	METBUDRAFT_3651	ARGSYNBSUB-PWY	0	0	1000	0	Confidence level: 2	2.3.1.35
RXN0-2382	INDOLE[c] + SER[c] -> TRP[c] + WATER[c]			0	0	1000	0	Confidence level: 0	4.2.1.122
FUMARATE-REDUCTASE-NADH-RXN	SUC[c] + NAD[c] <=> FUM[c] + NADH[c] + PROTON[c]			1	-1000	1000	0	Confidence level: 0	1.3.1.6
RXN-9362	CPD-12120[c] + S-ADENOSYLMETHIONINE[c] <=> CPD-12128[c] + ADENOSYL-HOMO-CYS[c] + PROTON[c]	METBUDRAFT_3792		1	-1000	1000	0	Confidence level: 2	2.1.1.163
DXPREDISOM-RXN	DEOXYXYLULOSE-5P[c] + NADPH[c] + PROTON[c] -> 2-C-METHYL-D-ERYTHRITOL-4-PHOSPHATE[c] + NADP[c]	METBUDRAFT_2008	NONMEVIPP-PWY	0	0	1000	0	Confidence level: 2	1.1.1.267
RXN-8759	CO__43__2[c] + DIHYDROSIROHYDROCHLORIN[c] <=> CPD-9039[c] + 4 PROTON[c]	METBUDRAFT_0731		1	-1000	1000	0	Confidence level: 2	4.99.1.3
DIHYDROFOLATEREDUCT-RXN	DIHYDROFOLATE[c] + NADPH[c] + PROTON[c] -> THF[c] + NADP[c]	METBUDRAFT_3277	PWY-6614, 1CMET2-PWY	0	0	1000	0	Confidence level: 2	1.5.1.3
RXN-7706	CPD-7037[c] + NAD[c] <=> CPD-7036[c] + NADH[c] + PROTON[c]	METBUDRAFT_1594 METBUDRAFT_2417		1	-1000	1000	0	Confidence level: 2	1.1.1.1
DADPKIN-RXN	DADP[c] + ATP[c] -> DATP[c] + ADP[c]	METBUDRAFT_3687	PWY-6126	0	0	1000	0	Confidence level: 2	2.7.4.6
RXN-5185	N-ACETYL-L-LYSINE[c] + WATER[c] -> LYS[c] + ACET[c]		PWY-3081	0	0	1000	0	Confidence level: 0
CDP-GLUCOSE-46-DEHYDRATASE-RXN	CDP-D-GLUCOSE[c] <=> CPD-658[c] + WATER[c]	METBUDRAFT_4014		1	-1000	1000	0	Confidence level: 2	4.2.1.45
RXN-13657	S-ADENOSYLMETHIONINE[c] + CPD-14678[c] <=> CPD-14680[c] + ADENOSYL-HOMO-CYS[c] + PROTON[c]		PWY-7104	1	-1000	1000	0	Confidence level: 0	2.1.1.-
ASPAMINOTRANS-RXN	OXALACETIC_ACID[c] + GLT[c] <=> L-ASPARTATE[c] + 2-KETOGLUTARATE[c]		ASPARTATESYN-PWY	1	-1000	1000	0	Confidence level: 0	2.6.1.1
RXN-12929	CPD-13954[c] + NADPH[c] + PROTON[c] -> CPD-11915[c] + NADP[c]		PWY-6974	0	0	1000	0	Confidence level: 0	1.1.1.-
ALANINE--GLYOXYLATE-AMINOTRANSFERASE-RXN	GLYOX[c] + L-ALPHA-ALANINE[c] -> GLY[c] + PYRUVATE[c]	METBUDRAFT_2200	GLYSYN-ALA-PWY	0	0	1000	0	Confidence level: 2	2.6.1.44
RXN-12705	CPD-13694[c] + NAD[c] <=> CPD-13695[c] + NADH[c] + PROTON[c]	METBUDRAFT_3643		1	-1000	1000	0	Confidence level: 2	1.1.1.35
ADCLY-RXN	4-AMINO-4-DEOXYCHORISMATE[c] -> P-AMINO-BENZOATE[c] + PYRUVATE[c] + PROTON[c]	METBUDRAFT_1062	PWY-6543	0	0	1000	0	Confidence level: 2	4.1.3.38
RXN-12195	CTP[c] + WATER[c] -> CDP[c] + Pi[c] + PROTON[c]	METBUDRAFT_2716	PWY-5687	0	0	1000	0	Confidence level: 2	3.6.1.15
6PGLUCONOLACT-RXN	D-6-P-GLUCONO-DELTA-LACTONE[c] + WATER[c] -> CPD-2961[c] + PROTON[c]	METBUDRAFT_3300	ENTNER-DOUDOROFF-PWY-1, PWYN0B-32	0	0	1000	0	Confidence level: 2	3.1.1.31
RXN-11591	16S-rRNA-cytosine967[c] + S-ADENOSYLMETHIONINE[c] <=> 16S-rRNA-5-O-methylcytosine967[c] + ADENOSYL-HOMO-CYS[c] + PROTON[c]	METBUDRAFT_3960		1	-1000	1000	0	Confidence level: 2	2.1.1.176
4.3.1.17-RXN	SER[c] -> AMMONIA[c] + PYRUVATE[c] + PROTON[c]	METBUDRAFT_0531	SERDEG-PWY	0	0	1000	0	Confidence level: 2	4.3.1.17
RXN-11051	CPD-11654[c] + 2 PROTON[c] <=> CPD-11643[c]	METBUDRAFT_2973		1	-1000	1000	0	Confidence level: 2	4.1.99.14
3.4.17.8-RXN	C1[c] + WATER[c] <=> UDP-MURNAC-TETRAPEPTIDE[c] + D-ALANINE[c]	METBUDRAFT_0530 METBUDRAFT_0871		1	-1000	1000	0	Confidence level: 2	3.4.17.8
RXN-10	O-UREIDOHOMOSERINE[c] + L-ASPARTATE[c] + ATP[c] -> CANAVANINOSUCCINATE[c] + PPI[c] + AMP[c] + PROTON[c]	METBUDRAFT_0711		0	0	1000	0	Confidence level: 2	6.3.4.5
2.7.7.13-RXN	MANNOSE-1P[c] + GTP[c] + PROTON[c] -> GDP-MANNOSE[c] + PPI[c]	METBUDRAFT_3828	PWY-5659	0	0	1000	0	Confidence level: 2	2.7.7.13
R341-RXN	CPD-687[c] + 2 GLN[c] + 2 ATP[c] + 2 WATER[c] -> CPD-688[c] + 2 GLT[c] + 2 Pi[c] + 2 ADP[c] + 2 PROTON[c]	METBUDRAFT_0733	P381-PWY	0	0	1000	0	Confidence level: 2	6.3.5.9
2-OCTAPRENYL-6-METHOXYPHENOL-HYDROX-RXN	2-OCTAPRENYL-6-METHOXYPHENOL[c] + OXYGEN-MOLECULE[c] + NADPH[c] + PROTON[c] -> OCTAPRENYL-METHOXY-BENZOQUINONE[c] + NADP[c] + WATER[c]		PWY-6708	0	0	1000	0	Confidence level: 0	1.14.13.-
2-AMINOADIPATE-AMINOTRANSFERASE-RXN	2K-ADIPATE[c] + GLT[c] -> CPD-468[c] + 2-KETOGLUTARATE[c]		LYSINE-AMINOAD-PWY, PWY-3081	0	0	1000	0	Confidence level: 0	2.6.1.39
PYRAMKIN-RXN	PYRIDOXAMINE[c] + ATP[c] -> PYRIDOXAMINE-5P[c] + ADP[c] + PROTON[c]		PLPSAL-PWY	0	0	1000	0	Confidence level: 0	2.7.1.35
UDP-NACMURALA-GLU-LIG-RXN	CPD0-1456[c] + D-GLT[c] + ATP[c] -> UDP-AA-GLUTAMATE[c] + Pi[c] + ADP[c] + PROTON[c]	METBUDRAFT_3621	PWY-6387	0	0	1000	0	Confidence level: 2	6.3.2.9
POLYPHOSPHATE-KINASE-RXN	ATP[c] <=> Long-Chain-Polyphosphate[c] + ADP[c]	METBUDRAFT_0673 METBUDRAFT_1593		1	-1000	1000	0	Confidence level: 2	2.7.4.1
PHEAMINOTRANS-RXN	PHENYL-PYRUVATE[c] + GLT[c] -> PHE[c] + 2-KETOGLUTARATE[c]		PHESYN	0	0	1000	0	Confidence level: 0	2.6.1.57
OHMETHYLBILANESYN-RXN	4 PORPHOBILINOGEN[c] + WATER[c] -> HYDROXYMETHYLBILANE[c] + 4 AMMONIA[c] + 4 PROTON[c]	METBUDRAFT_4528	PWY-5189, PWY-5188	0	0	1000	0	Confidence level: 2	2.5.1.61
THI-P-KIN-RXN	THIAMINE-P[c] + ATP[c] -> THIAMINE-PYROPHOSPHATE[c] + ADP[c]	METBUDRAFT_2082	PWY-6893, PWY-6894, PWY-6896, PWY-6897	0	0	1000	0	Confidence level: 2	2.7.4.16
N-ACETYLGLUTPREDUCT-RXN	N-ACETYL-GLUTAMYL-P[c] + NADPH[c] + PROTON[c] -> CPD-469[c] + Pi[c] + NADP[c]	METBUDRAFT_2579	ARGSYNBSUB-PWY	0	0	1000	0	Confidence level: 2	1.2.1.38
SIROHEME-FERROCHELAT-RXN	SIROHYDROCHLORIN[c] + FE__43__2[c] -> SIROHEME[c] + 2 PROTON[c]	METBUDRAFT_0722	PWY-5194	0	0	1000	0	Confidence level: 2	4.99.1.4
LEUCINE--TRNA-LIGASE-RXN	LEU-tRNAs[c] + LEU[c] + ATP[c] + PROTON[c] -> Charged-LEU-tRNAs[c] + PPI[c] + AMP[c]	METBUDRAFT_3995	TRNA-CHARGING-PWY	0	0	1000	0	Confidence level: 2	6.1.1.4
RXNN0B-90	PPI[c] <=> P3I[c] + Pi[c] + PROTON[c]			1	-1000	1000	0	Confidence level: 0
IMP-DEHYDROG-RXN	IMP[c] + NAD[c] + WATER[c] -> XANTHOSINE-5-PHOSPHATE[c] + NADH[c] + PROTON[c]	METBUDRAFT_3014	PWY-6125	0	0	1000	0	Confidence level: 2	1.1.1.205
HISTIDPHOS-RXN	L-HISTIDINOL-P[c] + WATER[c] -> HISTIDINOL[c] + Pi[c]		HISTSYN-PWY	0	0	1000	0	Confidence level: 0	3.1.3.15
RXNN0B-18	HCO3[c] + ATP[c] + PYRUVATE[c] -> OXALACETIC_ACID[c] + Pi[c] + ADP[c] + PROTON[c]	METBUDRAFT_1955 METBUDRAFT_3735	PWYN0B-33	0	0	1000	0	Confidence level: 2	6.4.1.1
GSAAMINOTRANS-RXN	GLUTAMATE-1-SEMIALDEHYDE[c] -> 5-AMINO-LEVULINATE[c]	METBUDRAFT_3782	PWY-5188	0	0	1000	0	Confidence level: 2	5.4.3.8
RXN0-884	HYDROXY-METHYL-BUTENYL-DIP[c] + NADH-P-OR-NOP[c] + PROTON[c] -> CPD-4211[c] + NAD-P-OR-NOP[c] + WATER[c]	METBUDRAFT_2613	NONMEVIPP-PWY	0	0	1000	0	Confidence level: 2	1.17.1.2
GLUTSEMIALDEHYDROG-RXN	L-GLUTAMATE-5-P[c] + NADPH[c] + PROTON[c] -> L-GLUTAMATE_GAMMA-SEMIALDEHYDE[c] + Pi[c] + NADP[c]	METBUDRAFT_0385 METBUDRAFT_4155	PROSYN-PWY	0	0	1000	0	Confidence level: 2	1.2.1.41
RXN0-5225	CPD0-1080[c] + WATER[c] <=> CPD0-1082[c] + CPD0-1081[c]	METBUDRAFT_0786		1	-1000	1000	0	Confidence level: 2	3.5.1.28
GLUCONOLACT-RXN	GLC-D-LACTONE[c] + WATER[c] <=> GLUCONATE[c] + PROTON[c]	METBUDRAFT_0430		1	-1000	1000	0	Confidence level: 2	3.1.1.17
RXN0-1461	COPROPORPHYRINOGEN_III[c] + OXYGEN-MOLECULE[c] + 2 PROTON[c] -> PROTOPORPHYRINOGEN[c] + 2 WATER[c] + 2 CARBON-DIOXIDE[c]	METBUDRAFT_3807	HEME-BIOSYNTHESIS-II, PWY0-1415	0	0	1000	0	Confidence level: 2	1.3.3.3
FPPSYN-RXN	GERANYL-PP[c] + DELTA3-ISOPENTENYL-PP[c] -> FARNESYL-PP[c] + PPI[c]	METBUDRAFT_4514	PWY-5123	0	0	1000	0	Confidence level: 2	2.5.1.10
RXN-9229	CPD-9861[c] + S-ADENOSYLMETHIONINE[c] <=> CPD-9955[c] + ADENOSYL-HOMO-CYS[c] + PROTON[c]			1	-1000	1000	0	Confidence level: 0	2.1.1.64
DTDPKIN-RXN	TDP[c] + ATP[c] -> TTP[c] + ADP[c]	METBUDRAFT_3687	PWY0-166	0	0	1000	0	Confidence level: 2	2.7.4.6
RXN-8626	THR[c] + ATP[c] -> L-THREONINE-O-3-PHOSPHATE[c] + ADP[c] + PROTON[c]			0	0	1000	0	Confidence level: 0	2.7.1.177
DIHYDLIPACETRANS-RXN	DIHYDROLIPOAMIDE[c] + ACETYL-COA[c] -> S-ACETYLDIHYDROLIPOAMIDE[c] + CO-A[c]	METBUDRAFT_1907		0	0	1000	0	Confidence level: 2	2.3.1.12
RXN-7693	CPD-7032[c] + NAD[c] <=> CPD-7031[c] + NADH[c] + PROTON[c]	METBUDRAFT_1594 METBUDRAFT_2417		1	-1000	1000	0	Confidence level: 2	1.1.1.1
CTPSYN-RXN	UTP[c] + GLN[c] + ATP[c] + WATER[c] -> CTP[c] + GLT[c] + Pi[c] + ADP[c] + 2 PROTON[c]	METBUDRAFT_0470	PWY-5687	0	0	1000	0	Confidence level: 2	6.3.4.2
RXN-5182	N2-ACETYL-ALPHA-AMIN[c] + ATP[c] -> N2ACETYL-ALPHA-NP[c] + ADP[c]		PWY-3081	0	0	1000	0	Confidence level: 0
BTUR2-RXN	COBINAMIDE[c] + ATP[c] -> P3I[c] + ADENOSYLCOBINAMIDE[c]	METBUDRAFT_1422	COBALSYN-PWY	0	0	1000	0	Confidence level: 2	2.5.1.17
RXN-13614	CPD-10267[c] + PPI[c] + AMP[c] -> CPD-3617[c] + ATP[c] + CO-A[c]			0	0	1000	0	Confidence level: 0	6.2.1.3
ARGSUCCINLYA-RXN	L-ARGININO-SUCCINATE[c] -> ARG[c] + FUM[c]	METBUDRAFT_4527	ARGSYNBSUB-PWY	0	0	1000	0	Confidence level: 2	4.3.2.1
AICARTRANSFORM-RXN	10-FORMYL-THF[c] + AICAR[c] -> THF[c] + PHOSPHORIBOSYL-FORMAMIDO-CARBOXAMIDE[c]	METBUDRAFT_0585	PWY-6123	0	0	1000	0	Confidence level: 2	2.1.2.3
RXN-12565	K-HEXANOYL-COA[c] + CO-A[c] -> BUTYRYL-COA[c] + ACETYL-COA[c]			0	0	1000	0	Confidence level: 0	2.3.1.16
ACONITATEHYDR-RXN	CIS-ACONITATE[c] + WATER[c] <=> THREO-DS-ISO-CITRATE[c]	METBUDRAFT_1921 METBUDRAFT_3589	TCA	1	-1000	1000	0	Confidence level: 2
RXN-12002	UMP[c] + ATP[c] <=> UDP[c] + ADP[c]			1	-1000	1000	0	Confidence level: 0	2.7.4.14/2.7.4.22
6.3.2.10-RXN	CPD-209[c] + D-ALA-D-ALA[c] + ATP[c] <=> C3[c] + Pi[c] + ADP[c] + PROTON[c]	METBUDRAFT_3619		1	-1000	1000	0	Confidence level: 2	6.3.2.10
RXN-11475	S-ADENOSYLMETHIONINE[c] + MALONYL-COA[c] -> CPD-12454[c] + ADENOSYL-HOMO-CYS[c]	METBUDRAFT_0308		0	0	1000	0	Confidence level: 2	2.1.1.197
4.1.1.81-RXN	L-THREONINE-O-3-PHOSPHATE[c] + PROTON[c] -> R-1-AMINOPROPAN-2-YL-PHOSPHATE[c] + CARBON-DIOXIDE[c]	METBUDRAFT_2046		0	0	1000	0	Confidence level: 2	4.1.1.81
RXN-10915	CPD-11497[c] + NAD[c] <=> CPD-11876[c] + NADH[c] + PROTON[c]	METBUDRAFT_1594 METBUDRAFT_2417		1	-1000	1000	0	Confidence level: 2	1.1.1.1
3.1.3.70-RXN	ALPHA-D-MANNOSYL-3-PHOSPHOGLYCERATE[c] + WATER[c] <=> 2-O-ALPHA-MANNOSYL-D-GLYCERATE[c] + Pi[c]	METBUDRAFT_4333		1	-1000	1000	0	Confidence level: 2	3.1.3.70
RIBOPHOSPHAT-RXN	CPD-1086[c] + WATER[c] -> AMINO-RIBOSYLAMINO-1H-3H-PYR-DIONE[c] + Pi[c]		RIBOSYN2-PWY	0	0	1000	0	Confidence level: 0
2.5.1.19-RXN	SHIKIMATE-5P[c] + PHOSPHO-ENOL-PYRUVATE[c] -> 3-ENOLPYRUVYL-SHIKIMATE-5P[c] + Pi[c]	METBUDRAFT_0265	PWY-6163	0	0	1000	0	Confidence level: 2	2.5.1.19
R223-RXN	CPD-196[c] + PPI[c] + AMP[c] -> CPD-195[c] + ATP[c] + CO-A[c]	METBUDRAFT_2787		0	0	1000	0	Confidence level: 2	6.2.1.3
UROPORIIIMETHYLTRANSA-RXN	UROPORPHYRINOGEN-III[c] + S-ADENOSYLMETHIONINE[c] -> CPD-9038[c] + ADENOSYL-HOMO-CYS[c] + PROTON[c]	METBUDRAFT_0722 METBUDRAFT_1216	P381-PWY, PWY-5194	0	0	1000	0	Confidence level: 2
1.6.1.2-RXN	NADPH[c] + NAD[c] <=> NADP[c] + NADH[c]	METBUDRAFT_1440 METBUDRAFT_1441		1	-1000	1000	0	Confidence level: 2	1.6.1.2
PRTRANS-RXN	ANTHRANILATE[c] + PRPP[c] -> N-5-PHOSPHORIBOSYL-ANTHRANILATE[c] + PPI[c]	METBUDRAFT_2963 METBUDRAFT_4412	TRPSYN-PWY	0	0	1000	0	Confidence level: 2	2.4.2.18
TRYPTOPHAN--TRNA-LIGASE-RXN	TRP-tRNAs[c] + TRP[c] + ATP[c] + PROTON[c] -> Charged-TRP-tRNAs[c] + PPI[c] + AMP[c]	METBUDRAFT_1400	TRNA-CHARGING-PWY	0	0	1000	0	Confidence level: 2	6.1.1.2
PMPOXI-RXN	PYRIDOXAMINE-5P[c] + OXYGEN-MOLECULE[c] + WATER[c] -> PYRIDOXAL_PHOSPHATE[c] + AMMONIA[c] + HYDROGEN-PEROXIDE[c] + PROTON[c]	METBUDRAFT_0018	PLPSAL-PWY	0	0	1000	0	Confidence level: 2	1.4.3.5
PGLUCISOM-RXN	FRUCTOSE-6P[c] -> GLC-6-P[c]	METBUDRAFT_3011	ENTNER-DOUDOROFF-PWY-1, PWYN0B-32, GLUCONEO-PWY	0	0	1000	0	Confidence level: 2	5.3.1.9
O-SUCCHOMOSERLYASE-RXN	O-SUCCINYL-L-HOMOSERINE[c] + CYS[c] -> L-CYSTATHIONINE[c] + SUC[c] + PROTON[c]		HOMOSER-METSYN-PWY	0	0	1000	0	Confidence level: 0	2.5.1.48
SUPEROX-DISMUT-RXN	2 SUPER-OXIDE[c] + 2 PROTON[c] -> OXYGEN-MOLECULE[c] + HYDROGEN-PEROXIDE[c]	METBUDRAFT_2318	DETOX1-PWY	0	0	1000	0	Confidence level: 2	1.15.1.1
METHENYLTHFCYCLOHYDRO-RXN	5-10-METHENYL-THF[c] + WATER[c] <=> 10-FORMYL-THF[c] + PROTON[c]	METBUDRAFT_1853 METBUDRAFT_3854	PWY-6613, PWY-1722, 1CMET2-PWY	1	-1000	1000	0	Confidence level: 2	3.5.4.9
SERINE-O-ACETTRAN-RXN	SER[c] + ACETYL-COA[c] -> ACETYLSERINE[c] + CO-A[c]	METBUDRAFT_0285 METBUDRAFT_2240 METBUDRAFT_4098	CYSTSYN-PWY	0	0	1000	0	Confidence level: 2	2.3.1.30
L-GLN-FRUCT-6-P-AMINOTRANS-RXN	FRUCTOSE-6P[c] + GLN[c] -> D-GLUCOSAMINE-6-P[c] + GLT[c]	METBUDRAFT_2663	UDPNAGSYN-PWY	0	0	1000	0	Confidence level: 2	2.6.1.16
RXNN0B-87	CH33ADO[c] + WATER[c] -> ADENINE[c] + 2-DEOXYRIBOSE[c]			0	0	1000	0	Confidence level: 0
HYPOXANPRIBOSYLTRAN-RXN	HYPOXANTHINE[c] + PRPP[c] -> IMP[c] + PPI[c]	METBUDRAFT_3822	PWY-6610	0	0	1000	0	Confidence level: 2	2.4.2.8
RXNN0B-50	ATP[c] + 5 Pi[c] + 2 PROTON[c] <=> 3 PPI[c] + ADP[c] + 2 WATER[c]			1	-1000	1000	0	Confidence level: 0
HISTCYCLOHYD-RXN	PHOSPHORIBOSYL-AMP[c] + WATER[c] -> PHOSPHORIBOSYL-FORMIMINO-AICAR-P[c]	METBUDRAFT_3039 METBUDRAFT_4182	HISTSYN-PWY	0	0	1000	0	Confidence level: 2	3.5.4.19
GMP-SYN-GLUT-RXN	XANTHOSINE-5-PHOSPHATE[c] + GLN[c] + ATP[c] + WATER[c] -> GMP[c] + GLT[c] + PPI[c] + AMP[c] + 2 PROTON[c]	METBUDRAFT_3013	PWY-6125	0	0	1000	0	Confidence level: 2	6.3.5.2
RXN0-742	5-PHOSPHORIBOSYL-5-AMINOIMIDAZOLE[c] + HCO3[c] + ATP[c] -> CPD0-181[c] + Pi[c] + ADP[c] + 2 PROTON[c]	METBUDRAFT_1901	PWY-6123	0	0	1000	0	Confidence level: 2	6.3.4.18
GLUTKIN-RXN	GLT[c] + ATP[c] -> L-GLUTAMATE-5-P[c] + ADP[c]	METBUDRAFT_3748	PROSYN-PWY	0	0	1000	0	Confidence level: 2	2.7.2.11
RXN0-5199	GUANOSINE[c] + Pi[c] -> RIBOSE-1P[c] + GUANINE[c]		PWY-6620	0	0	1000	0	Confidence level: 0	2.4.2.1
GLUC1PURIDYLTRANS-RXN	UTP[c] + GLC-1-P[c] + PROTON[c] -> UDP-GLUCOSE[c] + PPI[c]	METBUDRAFT_0147	PWYN0B-19	0	0	1000	0	Confidence level: 2	2.7.7.9
RXN-9990	N-ACETYLNEURAMINATE[c] + CTP[c] -> CMP-N-ACETYL-NEURAMINATE[c] + PPI[c]	METBUDRAFT_3867		0	0	1000	0	Confidence level: 2	2.7.7.43
FMNREDUCT-RXN	FMN[c] + NADH-P-OR-NOP[c] + 2 PROTON[c] -> FMNH2[c] + NAD-P-OR-NOP[c]		PWY-5523	0	0	1000	0	Confidence level: 0	1.5.1.39
RXN-9191	CPD-9731[c] + S-ADENOSYLMETHIONINE[c] <=> CPD-9718[c] + ADENOSYL-HOMO-CYS[c] + PROTON[c]	METBUDRAFT_3792		1	-1000	1000	0	Confidence level: 2	2.1.1.163
DTDPDEHYRHAMREDUCT-RXN	DTDP-DEOH-DEOXY-MANNOSE[c] + NADPH[c] + PROTON[c] -> DTDP-RHAMNOSE[c] + NADP[c]	METBUDRAFT_1740	DTDPRHAMSYN-PWY	0	0	1000	0	Confidence level: 2	1.1.1.133
DHHB-METHYLTRANSFER-RXN	OCTAPRENYL-METHYL-OH-METHOXY-BENZQ[c] + S-ADENOSYLMETHIONINE[c] -> CPD-9956[c] + ADENOSYL-HOMO-CYS[c] + PROTON[c]	METBUDRAFT_0508	PWY-6708	0	0	1000	0	Confidence level: 2	2.1.1.64
RXN-7609	GMP[c] + WATER[c] -> GUANOSINE[c] + Pi[c]	METBUDRAFT_0479 METBUDRAFT_2029 METBUDRAFT_2755 METBUDRAFT_4000		0	0	1000	0	Confidence level: 2	3.1.3.5
COBINAMIDEKIN-RXN	ADENOSYLCOBINAMIDE[c] + ATP[c] -> ADENOSYLCOBINAMIDE-P[c] + ADP[c] + PROTON[c]	METBUDRAFT_2063	COBALSYN-PWY	0	0	1000	0	Confidence level: 2	2.7.1.156
RXN-2884	FORMYL-THMPT[c] + WATER[c] -> THMPT[c] + FORMATE[c] + PROTON[c]	METBUDRAFT_1336 METBUDRAFT_1337 METBUDRAFT_1342 METBUDRAFT_1343	PWY-1723	0	0	1000	0	Confidence level: 2
BRANCHED-CHAINAMINOTRANSFERILEU-RXN	2-KETO-3-METHYL-VALERATE[c] + GLT[c] -> ILE[c] + 2-KETOGLUTARATE[c]	METBUDRAFT_1717	ILEUSYN-PWY	0	0	1000	0	Confidence level: 2	2.6.1.42
RXN-13418	CPD-3745[c] + FMNH2[c] + OXYGEN-MOLECULE[c] -> GLYCOLALDEHYDE[c] + SO3[c] + FMN[c] + WATER[c] + 2 PROTON[c]	METBUDRAFT_2581		0	0	1000	0	Confidence level: 2	1.14.14.5
ANTHRANSYN-RXN	CHORISMATE[c] + GLN[c] -> ANTHRANILATE[c] + GLT[c] + PYRUVATE[c] + PROTON[c]	METBUDRAFT_2961 METBUDRAFT_2962	TRPSYN-PWY	0	0	1000	0	Confidence level: 2	4.1.3.27
RXN-12806	CPD-13783[c] + ACETYL-COA[c] -> CPD-13828[c] + CO-A[c] + PROTON[c]		PWY-6953	0	0	1000	0	Confidence level: 0	2.3.1.197
ADOMET-DMK-METHYLTRANSFER-RXN	CPD-12115[c] + S-ADENOSYLMETHIONINE[c] <=> REDUCED-MENAQUINONE[c] + ADENOSYL-HOMO-CYS[c] + PROTON[c]	METBUDRAFT_3792	MENAQUINONESYN-PWY	1	-1000	1000	0	Confidence level: 2	2.1.1.163
RXN-12508	2-ALPHA-HYDROXYETHYL-THPP[c] + Pyruvate-dehydrogenase-lipoate[c] <=> THIAMINE-PYROPHOSPHATE[c] + Pyruvate-dehydrogenase-acetylDHlipoyl[c]	METBUDRAFT_1906	PYRUVDEHYD-PWY	1	-1000	1000	0	Confidence level: 2
ACETYLGLUTKIN-RXN	ACETYL-GLU[c] + ATP[c] -> N-ACETYL-GLUTAMYL-P[c] + ADP[c]	METBUDRAFT_2978	ARGSYNBSUB-PWY	0	0	1000	0	Confidence level: 2	2.7.2.8
RXN-11847	CPD-12117[c] + S-ADENOSYLMETHIONINE[c] -> CPD-12125[c] + ADENOSYL-HOMO-CYS[c] + PROTON[c]	METBUDRAFT_3792	PWY-5839	0	0	1000	0	Confidence level: 2	2.1.1.163
5.4.99.17-RXN	SQUALENE[c] -> HOP-2229-ENE[c]	METBUDRAFT_0234 METBUDRAFT_4506		0	0	1000	0	Confidence level: 2	5.4.99.17
4-COUMARATE--COA-LIGASE-RXN	COUMARATE[c] + ATP[c] + CO-A[c] <=> P-COUMAROYL-COA[c] + PPI[c] + AMP[c]	METBUDRAFT_3338		1	-1000	1000	0	Confidence level: 2	6.2.1.12
RXN-10855	CPD-468[c] + NADH-P-OR-NOP[c] + PROTON[c] -> CPD-7682[c] + NAD-P-OR-NOP[c] + 2 WATER[c]		LYSINE-AMINOAD-PWY	0	0	1000	0	Confidence level: 0
3-ISOPROPYLMALDEHYDROG-RXN	2-D-THREO-HYDROXY-3-CARBOXY-ISOCAPROATE[c] + NAD[c] -> CPD-7100[c] + NADH[c] + PROTON[c]	METBUDRAFT_0717	LEUSYN-PWY	0	0	1000	0	Confidence level: 2
RIBOFLAVINKIN-RXN	RIBOFLAVIN[c] + ATP[c] -> FMN[c] + ADP[c] + PROTON[c]	METBUDRAFT_3751	RIBOSYN2-PWY, PWY-5523	0	0	1000	0	Confidence level: 2	2.7.1.26
2.1.1.79-RXN	Phospholipid-Olefinic-Fatty-Acids[c] + S-ADENOSYLMETHIONINE[c] -> Phospholipid-Cyclopropane-Fatty-Acids[c] + ADENOSYL-HOMO-CYS[c] + PROTON[c]	METBUDRAFT_3333 METBUDRAFT_3335	PWY0-541	0	0	1000	0	Confidence level: 2	2.1.1.79
R12-RXN	CPD-26[c] -> FRUCTOSE-6P[c]	METBUDRAFT_0862 METBUDRAFT_3233 METBUDRAFT_3237 METBUDRAFT_3241	ENTNER-DOUDOROFF-PWY-1, PWYN0B-24, PWYN0B-32	0	0	1000	0	Confidence level: 2	5.3.1.27
UREASE-RXN	UREA[c] + WATER[c] -> 2 AMMONIA[c] + CARBON-DIOXIDE[c]	METBUDRAFT_0161 METBUDRAFT_0162 METBUDRAFT_0163	PWY-5704	0	0	1000	0	Confidence level: 2	3.5.1.5
1.3.1.72-RXN	CPD-4186[c] + NADP[c] <=> 5-ALPHA-CHOLESTA-724-DIEN-3-BETA-OL[c] + NADPH[c] + PROTON[c]	METBUDRAFT_3340		1	-1000	1000	0	Confidence level: 2	1.3.1.72
PROTOPORGENOXI-RXN	PROTOPORPHYRINOGEN[c] + 3 OXYGEN-MOLECULE[c] -> PROTOPORPHYRIN_IX[c] + 3 HYDROGEN-PEROXIDE[c]		HEME-BIOSYNTHESIS-II, PWY0-1415	0	0	1000	0	Confidence level: 0	1.3.3.4
TRIOSEPISOMERIZATION-RXN	GAP[c] <=> DIHYDROXY-ACETONE-PHOSPHATE[c]	METBUDRAFT_1229	PWYN0B-24, GLUCONEO-PWY	1	-1000	1000	0	Confidence level: 2	5.3.1.1
PHOSPHATIDATE-PHOSPHATASE-RXN	CPD0-1422[c] + WATER[c] -> DIACYLGLYCEROL[c] + Pi[c] + 2 PROTON[c]	METBUDRAFT_3405		0	0	1000	0	Confidence level: 2	3.1.3.4
THYMIDYLATESYN-RXN	DUMP[c] + METHYLENE-THF[c] -> DIHYDROFOLATE[c] + TMP[c]	METBUDRAFT_3107	1CMET2-PWY, PWY0-166	0	0	1000	0	Confidence level: 2	2.1.1.45
PANTOTHENATE-KIN-RXN	PANTOTHENATE[c] + ATP[c] -> 4-P-PANTOTHENATE[c] + ADP[c] + PROTON[c]	METBUDRAFT_0869	PANTO-PWY	0	0	1000	0	Confidence level: 2	2.7.1.33
NICOTINAMID-RXN	NIACINAMIDE[c] + WATER[c] -> NIACINE[c] + AMMONIA[c] + PROTON[c]	METBUDRAFT_2657	PYRIDNUCSAL-PWY	0	0	1000	0	Confidence level: 2	3.5.1.19
SUCROSE-PHOSPHORYLASE-RXN	GLC-1-P[c] + BETA-D-FRUCTOSE[c] -> SUCROSE[c] + Pi[c]	METBUDRAFT_1558		0	0	1000	0	Confidence level: 2	2.4.1.7
MANNPISOM-RXN	MANNOSE-6P[c] -> FRUCTOSE-6P[c]	METBUDRAFT_0145	MANNCAT-PWY, PWY-5659	0	0	1000	0	Confidence level: 2	5.3.1.8
SERINE--GLYOXYLATE-AMINOTRANSFERASE-RXN	SER[c] + GLYOX[c] -> OH-PYR[c] + GLY[c]	METBUDRAFT_2200		0	0	1000	0	Confidence level: 2	2.6.1.45
KDOTRANS2-RXN	KDO-LIPID-IVA[c] + CMP-KDO[c] -> KDO2-LIPID-IVA[c] + CMP[c] + PROTON[c]		KDOSYN-PWY	0	0	1000	0	Confidence level: 0	2.4.99.13
RXNN0B-80	RIBOSE-5P[c] + WATER[c] -> RIBOSE[c] + Pi[c]			0	0	1000	0	Confidence level: 0
HYDROGEN-DEHYDROGENASE-RXN	HYDROGEN-MOLECULE[c] + NAD[c] <=> NADH[c] + PROTON[c]	METBUDRAFT_1387 METBUDRAFT_1388 METBUDRAFT_1390	PWY-6758, PWY-5382	1	-1000	1000	0	Confidence level: 2	1.12.1.2
RXNN0B-39	GDP-MANNOSE[c] + WATER[c] -> CPD-13559[c] + GDP[c] + PROTON[c]			0	0	1000	0	Confidence level: 0
HEMN-RXN	COPROPORPHYRINOGEN_III[c] + 2 S-ADENOSYLMETHIONINE[c] -> PROTOPORPHYRINOGEN[c] + 2 CH33ADO[c] + 2 MET[c] + 2 CARBON-DIOXIDE[c]	METBUDRAFT_0257 METBUDRAFT_2957	HEMESYN2-PWY	0	0	1000	0	Confidence level: 2	1.3.99.22
RXN66-281	CPD-465[c] + NADH-P-OR-NOP[c] + PROTON[c] -> SQUALENE[c] + NAD-P-OR-NOP[c] + PPI[c]	METBUDRAFT_4507	PWY-5670	0	0	1000	0	Confidence level: 2
GLYOXI-RXN	METHYL-GLYOXAL[c] + GLUTATHIONE[c] -> S-LACTOYL-GLUTATHIONE[c]	METBUDRAFT_1113	PWY-5386	0	0	1000	0	Confidence level: 2	4.4.1.5
GLUTATHIONE-SYN-RXN	L-GAMMA-GLUTAMYLCYSTEINE[c] + GLY[c] + ATP[c] -> GLUTATHIONE[c] + Pi[c] + ADP[c] + PROTON[c]	METBUDRAFT_3349	GLUTATHIONESYN-PWY	0	0	1000	0	Confidence level: 2	6.3.2.3
RXN0-4301	D-SEDOHEPTULOSE-7-P[c] <=> D-ALPHABETA-D-HEPTOSE-7-PHOSPHATE[c]	METBUDRAFT_3609		1	-1000	1000	0	Confidence level: 2	5.3.1.28
GDPMANDEHYDRA-RXN	GDP-MANNOSE[c] -> GDP-4-DEHYDRO-6-DEOXY-D-MANNOSE[c] + WATER[c]	METBUDRAFT_2594	PWY-66	0	0	1000	0	Confidence level: 2	4.2.1.47
RXN-9624	STEAROYL-COA[c] + WATER[c] -> STEARIC_ACID[c] + CO-A[c] + PROTON[c]			0	0	1000	0	Confidence level: 0	3.1.2.2
F16BDEPHOS-RXN	FRUCTOSE-16-DIPHOSPHATE[c] + WATER[c] -> FRUCTOSE-6P[c] + Pi[c]	METBUDRAFT_1560	GLUCONEO-PWY	0	0	1000	0	Confidence level: 2	3.1.3.11
RXN-8992	5 DELTA3-ISOPENTENYL-PP[c] + FARNESYL-PP[c] -> OCTAPRENYL-DIPHOSPHATE[c] + 5 PPI[c]	METBUDRAFT_3744	PWY-5783	0	0	1000	0	Confidence level: 2	2.5.1.90
DIOHBUTANONEPSYN-RXN	RIBULOSE-5P[c] -> DIHYDROXY-BUTANONE-P[c] + FORMATE[c] + PROTON[c]	METBUDRAFT_2086	RIBOSYN2-PWY	0	0	1000	0	Confidence level: 2	4.1.99.12
RXN-8124	P-AMINO-BENZOATE[c] + PRPP[c] + PROTON[c] <=> CPD-7652[c] + PPI[c] + CARBON-DIOXIDE[c]	METBUDRAFT_1299		1	-1000	1000	0	Confidence level: 2	2.4.2.-
DEPHOSPHOCOAKIN-RXN	DEPHOSPHO-COA[c] + ATP[c] -> ADP[c] + CO-A[c] + PROTON[c]	METBUDRAFT_2453	COA-PWY	0	0	1000	0	Confidence level: 2	2.7.1.24
RXN-6282	CPD-5727[c] + WATER[c] <=> FORMYL-THF-GLU-N[c] + PROTON[c]	METBUDRAFT_1853 METBUDRAFT_3854		1	-1000	1000	0	Confidence level: 2	3.5.4.9
COBALADENOSYLTRANS-RXN	COB-I-ALAMIN[c] + ATP[c] + 2 PROTON[c] -> P3I[c] + ADENOSYLCOBALAMIN[c]	METBUDRAFT_1422	PWY-6268	0	0	1000	0	Confidence level: 2	2.5.1.17
RXN-1623	CPDN0B-7[c] + 1-PALMITOYLGLYCEROL-3-PHOSPHATE[c] -> CPD0-1422[c] + CO-A[c]	METBUDRAFT_1123 METBUDRAFT_2422 METBUDRAFT_2938	PWYN0B-39	0	0	1000	0	Confidence level: 2	2.3.1.51
ASPDECARBOX-RXN	L-ASPARTATE[c] + PROTON[c] -> B-ALANINE[c] + CARBON-DIOXIDE[c]	METBUDRAFT_2468	PWY-5155	0	0	1000	0	Confidence level: 2	4.1.1.11
RXN-12942	CPD-13970[c] -> CPD-13987[c]		PWY-6976	0	0	1000	0	Confidence level: 0	5.1.3.-
AMPSYN-RXN	ADENYLOSUCC[c] -> FUM[c] + AMP[c]		PWY-6126	0	0	1000	0	Confidence level: 0	4.3.2.2
RXN-12767	CPD-13775[c] + 2 S-ADENOSYLMETHIONINE[c] -> CPD-13776[c] + 2 ADENOSYL-HOMO-CYS[c] + 2 PROTON[c]		PWY-6942	0	0	1000	0	Confidence level: 0	2.1.1.234
ADENYLATECYC-RXN	ATP[c] -> CAMP[c] + PPI[c]	METBUDRAFT_2319 METBUDRAFT_4526		0	0	1000	0	Confidence level: 2	4.6.1.1
RXN-12459	Guanine9-in-tRNA[c] + S-ADENOSYLMETHIONINE[c] <=> tRNA-Containing-N1-Methylguanine-9[c] + ADENOSYL-HOMO-CYS[c] + PROTON[c]	METBUDRAFT_4042		1	-1000	1000	0	Confidence level: 2	2.1.1.221
ACETOOHBUTREDUCTOISOM-RXN	2-ACETO-2-HYDROXY-BUTYRATE[c] + NADPH[c] + PROTON[c] -> 1-KETO-2-METHYLVALERATE[c] + NADP[c]	METBUDRAFT_2309	ILEUSYN-PWY	0	0	1000	0	Confidence level: 2	1.1.1.86
RXN-11662	S-3-HYDROXYBUTANOYL-COA[c] + NAD[c] <=> ACETOACETYL-COA[c] + NADH[c] + PROTON[c]	METBUDRAFT_3643		1	-1000	1000	0	Confidence level: 0	1.1.1.35
5.3.1.23-RXN	CPD-444[c] -> CPD-1063[c]	METBUDRAFT_0510	PWY-6755	0	0	1000	0	Confidence level: 2	5.3.1.23
RXN-11348	2 CPD-12307[c] <=> CPD-12308[c] + UNDECAPRENYL-DIPHOSPHATE[c] + PROTON[c]	METBUDRAFT_1886 METBUDRAFT_3617		1	-1000	1000	0	Confidence level: 2	2.4.1.129
RXN-10702	CPD-11523[c] + NAD[c] <=> CPD-11524[c] + NADH[c] + PROTON[c]	METBUDRAFT_3643		1	-1000	1000	0	Confidence level: 2	1.1.1.35
3-CH3-2-OXOBUTANOATE-OH-CH3-XFER-RXN	2-KETO-ISOVALERATE[c] + METHYLENE-THF[c] + WATER[c] -> THF[c] + 2-DEHYDROPANTOATE[c]	METBUDRAFT_2466	PANTO-PWY	0	0	1000	0	Confidence level: 2	2.1.2.11
RIB5PISOM-RXN	RIBOSE-5P[c] -> RIBULOSE-5P[c]		PWYN0B-31	0	0	1000	0	Confidence level: 0	5.3.1.6
2.1.1.133-RXN	CPD-651[c] + S-ADENOSYLMETHIONINE[c] -> CPD-662[c] + ADENOSYL-HOMO-CYS[c] + PROTON[c]	METBUDRAFT_0732	P381-PWY	0	0	1000	0	Confidence level: 2	2.1.1.133
R101-RXN	L-ASPARTATE-SEMIALDEHYDE[c] + GLT[c] -> CPD-470[c] + 2-KETOGLUTARATE[c]	METBUDRAFT_2401 METBUDRAFT_3205	P101-PWY	0	0	1000	0	Confidence level: 2	2.6.1.76
UDPNACETYLMURAMATEDEHYDROG-RXN	UDP-ACETYL-CARBOXYVINYL-GLUCOSAMINE[c] + NADPH[c] + PROTON[c] -> UDP-N-ACETYLMURAMATE[c] + NADP[c]	METBUDRAFT_3625	PWY-6387	0	0	1000	0	Confidence level: 2	1.1.1.158
1.1.1.87-RXN	HOMO-I-CIT[c] + NAD[c] -> 2K-ADIPATE[c] + NADH[c] + CARBON-DIOXIDE[c]		LYSINE-AMINOAD-PWY, PWY-3081	0	0	1000	0	Confidence level: 0	1.1.1.87
PRIBFAICARPISOM-RXN	PHOSPHORIBOSYL-FORMIMINO-AICAR-P[c] -> PHOSPHORIBULOSYL-FORMIMINO-AICAR-P[c]	METBUDRAFT_1306 METBUDRAFT_3041	HISTSYN-PWY	0	0	1000	0	Confidence level: 2	5.3.1.16
PHOSPHAGLYPSYN-RXN	CPD-12815[c] + GLYCEROL-3P[c] + WATER[c] -> L-1-PHOSPHATIDYL-GLYCEROL-P[c] + CMP[c] + Pi[c]	METBUDRAFT_1699 METBUDRAFT_3916		0	0	1000	0	Confidence level: 2	2.7.8.5
PABASYN-RXN	CHORISMATE[c] + GLN[c] -> 4-AMINO-4-DEOXYCHORISMATE[c] + GLT[c]	METBUDRAFT_0620	PWY-6543	0	0	1000	0	Confidence level: 2	2.6.1.85
NAG1P-URIDYLTRANS-RXN	UTP[c] + N-ACETYL-D-GLUCOSAMINE-1-P[c] + PROTON[c] -> UDP-N-ACETYL-D-GLUCOSAMINE[c] + PPI[c]	METBUDRAFT_2664	UDPNAGSYN-PWY	0	0	1000	0	Confidence level: 2	2.7.7.23
SUCCINYLDIAMINOPIMTRANS-RXN	N-SUCCINYL-2-AMINO-6-KETOPIMELATE[c] + GLT[c] -> N-SUCCINYLLL-2-6-DIAMINOPIMELATE[c] + 2-KETOGLUTARATE[c]	METBUDRAFT_1345	DAPLYSINESYN-PWY	0	0	1000	0	Confidence level: 2	2.6.1.17
MALATE-DEH-RXN	MAL[c] + NAD[c] <=> OXALACETIC_ACID[c] + NADH[c] + PROTON[c]	METBUDRAFT_2208	PWYN0B-33, GLUCONEO-PWY, TCA	1	-1000	1000	0	Confidence level: 2	1.1.1.37
S-ADENMETSYN-RXN	MET[c] + ATP[c] + WATER[c] -> S-ADENOSYLMETHIONINE[c] + PPI[c] + Pi[c]	METBUDRAFT_3022	SAM-PWY, METHIONINE-DEG1-PWY	0	0	1000	0	Confidence level: 2	2.5.1.6
KDO-8PPHOSPHAT-RXN	KDO-8P[c] + WATER[c] -> KDO[c] + Pi[c]	METBUDRAFT_2491	PWY-1269	0	0	1000	0	Confidence level: 2	3.1.3.45
RXNN0B-76	CPD-14553[c] + WATER[c] -> GALACTOSE[c] + UDP[c] + PROTON[c]			0	0	1000	0	Confidence level: 0
HOMOSERDEHYDROG-RXN	L-ASPARTATE-SEMIALDEHYDE[c] + NADH-P-OR-NOP[c] + PROTON[c] -> HOMO-SER[c] + NAD-P-OR-NOP[c]	METBUDRAFT_0779	HOMOSERSYN-PWY	0	0	1000	0	Confidence level: 2	1.1.1.3
RXNN0B-3	Ubiquinones[c] + NADH[c] + 5 PROTON[c] -> 4 PROTON[p] + Ubiquinols[c] + NAD[c]	METBUDRAFT_0832 METBUDRAFT_1176 METBUDRAFT_1177 METBUDRAFT_1178 METBUDRAFT_1179 METBUDRAFT_1180 METBUDRAFT_1181 METBUDRAFT_3577		0	0	1000	0	Confidence level: 2	1.6.5.3
H2NEOPTERINP3PYROPHOSPHOHYDRO-RXN	DIHYDRONEOPTERIN-P3[c] + WATER[c] -> DIHYDRONEOPTERIN-P[c] + PPI[c] + PROTON[c]		PWY-6147	0	0	1000	0	Confidence level: 0	3.6.1.-
RXN66-12	CPD-8607[c] + OXYGEN-MOLECULE[c] + NADPH[c] + PROTON[c] <=> CPD-8608[c] + NADP[c] + 2 WATER[c]	METBUDRAFT_4054		1	-1000	1000	0	Confidence level: 2
GLYCOLALD-DEHYDROG-RXN	GLYCOLALDEHYDE[c] + NAD[c] + WATER[c] <=> GLYCOLLATE[c] + NADH[c] + 2 PROTON[c]			1	-1000	1000	0	Confidence level: 0	1.2.1.21
RXN0-6377	NITRITE[c] + 3 NADH-P-OR-NOP[c] + 5 PROTON[c] -> AMMONIUM[c] + 3 NAD-P-OR-NOP[c] + 2 WATER[c]	METBUDRAFT_0605 METBUDRAFT_0913 METBUDRAFT_1330 METBUDRAFT_1331 METBUDRAFT_4050	PWY-5675-1	0	0	1000	0	Confidence level: 2	1.7.1.4
GLUTAMINESYN-RXN	AMMONIA[c] + GLT[c] + ATP[c] -> GLN[c] + Pi[c] + ADP[c]	METBUDRAFT_1694	PWY-5675-1, GLNSYN-PWY, PWY-6963	0	0	1000	0	Confidence level: 2	6.3.1.2
RXN0-366	GUANOSINE[c] + WATER[c] -> RIBOSE[c] + GUANINE[c]		PWY-6599	0	0	1000	0	Confidence level: 0	3.2.2.1
GART-RXN	5-PHOSPHO-RIBOSYL-GLYCINEAMIDE[c] + 10-FORMYL-THF[c] -> 5-P-RIBOSYL-N-FORMYLGLYCINEAMIDE[c] + THF[c] + PROTON[c]	METBUDRAFT_1909	PWY-6613, PWY-6121	0	0	1000	0	Confidence level: 2	2.1.2.2
RXN-9384	O-SUCCINYL-L-HOMOSERINE[c] + HS[c] -> HOMO-CYS[c] + SUC[c] + PROTON[c]	METBUDRAFT_0499		0	0	1000	0	Confidence level: 2
ERYTHRON4PDEHYDROG-RXN	ERYTHRONATE-4P[c] + NAD[c] -> 3OH-4P-OH-ALPHA-KETOBUTYRATE[c] + NADH[c] + PROTON[c]		PYRIDOXSYN-PWY	0	0	1000	0	Confidence level: 0	1.1.1.290
RXN-8771	FMNH2[c] + OXYGEN-MOLECULE[c] -> CPD-15999[c] + ERYTHROSE-4P[c] + DIMETHYLBENZIMIDAZOLE[c]			0	0	1000	0	Confidence level: 0	1.13.11.-
DIHYDROXYISOVALDEHYDRAT-RXN	DIOH-ISOVALERATE[c] -> 2-KETO-ISOVALERATE[c] + WATER[c]	METBUDRAFT_1245	VALSYN-PWY	0	0	1000	0	Confidence level: 2	4.2.1.9
RXN-7958	PROPIONATE[c] + ATP[c] -> PROPIONYL-P[c] + ADP[c]	METBUDRAFT_1552		0	0	1000	0	Confidence level: 2	2.7.2.1
DARAB5PISOM-RXN	RIBULOSE-5P[c] -> ARABINOSE-5P[c]	METBUDRAFT_2492	PWY-1269	0	0	1000	0	Confidence level: 2	5.3.1.13
RXN-5841	NICOTINAMIDE_NUCLEOTIDE[c] + WATER[c] <=> NICOTINAMIDE_RIBOSE[c] + Pi[c]	METBUDRAFT_0479 METBUDRAFT_2029 METBUDRAFT_2755 METBUDRAFT_4000		1	-1000	1000	0	Confidence level: 2	3.1.3.5
CHORISMATEMUT-RXN	CHORISMATE[c] -> PREPHENATE[c]		PHESYN, TYRSYN	0	0	1000	0	Confidence level: 0	5.4.99.5
RXN-13724	CPD-465[c] + NADPH[c] + PROTON[c] <=> SQUALENE[c] + PPI[c] + NADP[c]	METBUDRAFT_4507		1	-1000	1000	0	Confidence level: 0	1.3.1.-
ASPARTATE-SEMIALDEHYDE-DEHYDROGENASE-RXN	L-BETA-ASPARTYL-P[c] + NADPH[c] + PROTON[c] -> L-ASPARTATE-SEMIALDEHYDE[c] + Pi[c] + NADP[c]	METBUDRAFT_3814	DAPLYSINESYN-PWY, P101-PWY, HOMOSERSYN-PWY	0	0	1000	0	Confidence level: 2	1.2.1.11
RXN-12935	CPD-13987[c] + NADPH[c] + PROTON[c] -> CPD-13967[c] + NADP[c]		PWY-6976	0	0	1000	0	Confidence level: 0	1.1.1.-
ALCOHOL-DEHYDROG-RXN	ETOH[c] + NAD[c] <=> ACETALD[c] + NADH[c] + PROTON[c]		PWY-5480, PWY-6587	1	-1000	1000	0	Confidence level: 0	1.1.1.1
RXN-12750	CPD-13757[c] + NAD[c] <=> CPD-13758[c] + NADH[c] + PROTON[c]	METBUDRAFT_3643		1	-1000	1000	0	Confidence level: 2	1.1.1.35
ADENOSYLHOMOCYSTEINE-NUCLEOSIDASE-RXN	ADENOSYL-HOMO-CYS[c] + WATER[c] -> ADENINE[c] + CPD-564[c]	METBUDRAFT_4505	PWY-6151	0	0	1000	0	Confidence level: 2	3.2.2.9
ACETATEKIN-RXN	ACETYL-P[c] + ADP[c] -> ACET[c] + ATP[c]	METBUDRAFT_1552	PWY-5485	0	0	1000	0	Confidence level: 2	2.7.2.1
RXN-11635	23S-rRNA-guanine-1835[c] + S-ADENOSYLMETHIONINE[c] <=> 23S-rRNA-N2-methylguanine1835[c] + ADENOSYL-HOMO-CYS[c] + PROTON[c]	METBUDRAFT_1455		1	-1000	1000	0	Confidence level: 2	2.1.1.174
5-FORMYL-THF-CYCLO-LIGASE-RXN	5-FORMYL-THF[c] + ATP[c] <=> 5-10-METHENYL-THF[c] + Pi[c] + ADP[c]	METBUDRAFT_1891	1CMET2-PWY	1	-1000	1000	0	Confidence level: 2	6.3.3.2
RXN-11246	CPD-12200[c] + CO-A[c] -> CPD-201[c] + ACETYL-COA[c]	METBUDRAFT_3644		0	0	1000	0	Confidence level: 2	2.3.1.16
RXN-10642	CPD-11444[c] <=> COPROPORPHYRINOGEN_I[c] + 4 PROTON[c] + 4 CARBON-DIOXIDE[c]	METBUDRAFT_0454 METBUDRAFT_2219		1	-1000	1000	0	Confidence level: 2	4.1.1.37
2OXOGLUTARATEDEH-RXN	2-KETOGLUTARATE[c] + CO-A[c] + NAD[c] -> SUC-COA[c] + NADH[c] + CARBON-DIOXIDE[c]		TCA	0	0	1000	0	Confidence level: 0	1.2.4.2
R345-RXN	CPD-690[c] + 4 GLN[c] + 4 ATP[c] + 4 WATER[c] -> CPD-691[c] + 4 GLT[c] + 4 Pi[c] + 4 ADP[c] + 4 PROTON[c]	METBUDRAFT_2062	PWY-5509, PWY-5508	0	0	1000	0	Confidence level: 2	6.3.5.10
2.1.1.130-RXN	DIHYDROSIROHYDROCHLORIN[c] + S-ADENOSYLMETHIONINE[c] -> CPD-642[c] + ADENOSYL-HOMO-CYS[c] + PROTON[c]	METBUDRAFT_0727	P381-PWY	0	0	1000	0	Confidence level: 2	2.1.1.130
QUINOLINATE-SYNTHA-RXN	IMINOASPARTATE[c] + DIHYDROXY-ACETONE-PHOSPHATE[c] -> QUINOLINATE[c] + Pi[c] + 2 WATER[c]	METBUDRAFT_1182	PYRIDNUCSYN-PWY	0	0	1000	0	Confidence level: 2	2.5.1.72
PYRROLINECARBDEHYDROG-RXN	L-DELTA1-PYRROLINE_5-CARBOXYLATE[c] + NAD[c] + 2 WATER[c] -> GLT[c] + NADH[c] + PROTON[c]		PROUT-PWY	0	0	1000	0	Confidence level: 0	1.5.1.-
UDPGLCNACEPIM-RXN	UDP-N-ACETYL-D-GLUCOSAMINE[c] <=> UDP-MANNAC[c]	METBUDRAFT_0349		1	-1000	1000	0	Confidence level: 2	5.1.3.14
1.1.1.210-RXN	ALPHA-ANDROSTAN-3BETA17BETA-DIOL[c] + NADP[c] <=> 17-BETA-HYDROXY-5ALPHA-ANDROSTAN-3-O[c] + NADPH[c] + PROTON[c]	METBUDRAFT_1112		1	-1000	1000	0	Confidence level: 2	1.1.1.210
PRAISOM-RXN	N-5-PHOSPHORIBOSYL-ANTHRANILATE[c] -> CARBOXYPHENYLAMINO-DEOXYRIBULOSE-P[c]	METBUDRAFT_0491	TRPSYN-PWY	0	0	1000	0	Confidence level: 2	5.3.1.24
PHOSGLYPHOS-RXN	DPG[c] + ADP[c] <=> G3P[c] + ATP[c]	METBUDRAFT_3789	PWYN0B-24, GLUCONEO-PWY	1	-1000	1000	0	Confidence level: 2	2.7.2.3
THREDEHYD-RXN	THR[c] -> 2-OXOBUTANOATE[c] + AMMONIA[c] + PROTON[c]	METBUDRAFT_3954	ILEUSYN-PWY	0	0	1000	0	Confidence level: 2	4.3.1.19
OROTPDECARB-RXN	OROTIDINE-5-PHOSPHATE[c] + PROTON[c] -> UMP[c] + CARBON-DIOXIDE[c]	METBUDRAFT_2562	PWY-5686-1	0	0	1000	0	Confidence level: 2	4.1.1.23
THIOPURINE-S-METHYLTRANSFERASE-RXN	Thiopurines[c] + S-ADENOSYLMETHIONINE[c] <=> Thiopurine-Methylethers[c] + ADENOSYL-HOMO-CYS[c] + PROTON[c]	METBUDRAFT_2936		1	-1000	1000	0	Confidence level: 2	2.1.1.67
NAD-KIN-RXN	ATP[c] + NAD[c] -> ADP[c] + NADP[c] + PROTON[c]	METBUDRAFT_0823	NADPHOS-DEPHOS-PWY	0	0	1000	0	Confidence level: 2	2.7.1.23
SQUALENE-MONOOXYGENASE-RXN	SQUALENE[c] + OXYGEN-MOLECULE[c] + NADPH[c] + PROTON[c] -> EPOXYSQUALENE[c] + NADP[c] + WATER[c]	METBUDRAFT_4051	PWY-5670	0	0	1000	0	Confidence level: 2	1.14.13.132
LYSINE--TRNA-LIGASE-RXN	LYS-tRNAs[c] + LYS[c] + ATP[c] + PROTON[c] -> Charged-LYS-tRNAs[c] + PPI[c] + AMP[c]	METBUDRAFT_1080 METBUDRAFT_2025	TRNA-CHARGING-PWY	0	0	1000	0	Confidence level: 2	6.1.1.6
RXNN0B-95	METOH[c] -> FORMALDEHYDE[c] + 2 PROTON[c]			0	0	1000	0	Confidence level: 0
IPPISOM-RXN	DELTA3-ISOPENTENYL-PP[c] <=> CPD-4211[c]	METBUDRAFT_0344	NONMEVIPP-PWY, PWY-5123	1	-1000	1000	0	Confidence level: 2	5.3.3.2
RXNN0B-72	PALMITATE[c] + ATP[c] + CO-A[c] -> CPDN0B-7[c] + PPI[c] + AMP[c]			0	0	1000	0	Confidence level: 0
HOMOCITRATE-SYNTHASE-RXN	2-KETOGLUTARATE[c] + ACETYL-COA[c] + WATER[c] -> HOMO-CIT[c] + CO-A[c] + PROTON[c]	METBUDRAFT_4096	LYSINE-AMINOAD-PWY, PWY-3081	0	0	1000	0	Confidence level: 2	2.3.3.14
RXNN0B-27	ADP-D-GLUCOSE[c] + WATER[c] -> ALPHA-GLUCOSE[c] + ADP[c] + PROTON[c]			0	0	1000	0	Confidence level: 0
GUANPRIBOSYLTRAN-RXN	PRPP[c] + GUANINE[c] -> GMP[c] + PPI[c]	METBUDRAFT_3822	PWY-6599, PWY-6620	0	0	1000	0	Confidence level: 2	2.4.2.8
RXN3O-1983	HOMO-CIT[c] -> HOMO-CIS-ACONITATE[c] + WATER[c]		LYSINE-AMINOAD-PWY, PWY-3081	0	0	1000	0	Confidence level: 0	4.2.1.114
GLYCERONE-KINASE-RXN	DIHYDROXYACETONE[c] + ATP[c] -> DIHYDROXY-ACETONE-PHOSPHATE[c] + ADP[c] + PROTON[c]		PWY-6131	0	0	1000	0	Confidence level: 0	2.7.1.29
RXN0-5462	GTP[c] + WATER[c] -> GDP[c] + Pi[c] + PROTON[c]	METBUDRAFT_0624 METBUDRAFT_0625 METBUDRAFT_1793 METBUDRAFT_2191 METBUDRAFT_3693 METBUDRAFT_4230		0	0	1000	0	Confidence level: 2	3.6.5.-
GLUTAMATE-SYNTHASE-NADH-RXN	GLN[c] + 2-KETOGLUTARATE[c] + NADH[c] + PROTON[c] -> 2 GLT[c] + NAD[c]	METBUDRAFT_2021	PWY-6963	0	0	1000	0	Confidence level: 2	1.4.1.14
RXN0-262	CPD-8123[c] + GTP[c] + PROTON[c] -> CPD-582[c] + PPI[c]	METBUDRAFT_0840	PWY-5964	0	0	1000	0	Confidence level: 2	2.7.7.77
FUMHYDR-RXN	MAL[c] <=> FUM[c] + WATER[c]	METBUDRAFT_1453 METBUDRAFT_2764	PWYN0B-33, TCA	1	-1000	1000	0	Confidence level: 2	4.2.1.2
RXN-9363	CPD-12121[c] + S-ADENOSYLMETHIONINE[c] <=> CPD-12129[c] + ADENOSYL-HOMO-CYS[c] + PROTON[c]	METBUDRAFT_3792		1	-1000	1000	0	Confidence level: 2	2.1.1.163
DXS-RXN	GAP[c] + PYRUVATE[c] + PROTON[c] -> DEOXYXYLULOSE-5P[c] + CARBON-DIOXIDE[c]	METBUDRAFT_1372 METBUDRAFT_4513	NONMEVIPP-PWY, PYRIDOXSYN-PWY	0	0	1000	0	Confidence level: 2	2.2.1.7
RXN-8763	CPD-9042[c] + WATER[c] <=> CPD-9047[c] + ACETALD[c] + PROTON[c]	METBUDRAFT_0725 METBUDRAFT_0726		1	-1000	1000	0	Confidence level: 2	3.7.1.12
DIHYDROFOLATESYNTH-RXN	7-8-DIHYDROPTEROATE[c] + GLT[c] + ATP[c] -> DIHYDROFOLATE[c] + Pi[c] + ADP[c] + PROTON[c]	METBUDRAFT_0495	PWY-6614, 1CMET2-PWY	0	0	1000	0	Confidence level: 2	6.3.2.12
DAHPSYN-RXN	ERYTHROSE-4P[c] + PHOSPHO-ENOL-PYRUVATE[c] + WATER[c] -> 3-DEOXY-D-ARABINO-HEPTULOSONATE-7-P[c] + Pi[c]	METBUDRAFT_2951	PWY-6164	0	0	1000	0	Confidence level: 2	2.5.1.54
RXN-5424	INDOLE-3-GLYCOL[c] + NAD[c] <=> 3-INDOLYLGLYCOLALDEHYDE[c] + NADH[c] + PROTON[c]	METBUDRAFT_1594 METBUDRAFT_2417		1	-1000	1000	0	Confidence level: 2	1.1.1.1
CDPDIGLYSYN-RXN	CPD0-1422[c] + CTP[c] + PROTON[c] -> CPD-12815[c] + PPI[c]	METBUDRAFT_2009	PWYN0B-39	0	0	1000	0	Confidence level: 2	2.7.7.41
RXN-13658	CPD-14680[c] + S-ADENOSYLMETHIONINE[c] <=> ADENOSYL-HOMO-CYS[c] + CPD-14681[c] + PROTON[c]		PWY-7104	1	-1000	1000	0	Confidence level: 0	2.1.1.-
ASPARAGHYD-RXN	ASN[c] + WATER[c] -> L-ASPARTATE[c] + AMMONIA[c] + PROTON[c]	METBUDRAFT_3276	ASPARAGINE-DEG1-PWY	0	0	1000	0	Confidence level: 2	3.5.1.1
RXN-12930	CPD-13381[c] + NADPH[c] + PROTON[c] -> CPD-13956[c] + NADP[c]		PWY-6973	0	0	1000	0	Confidence level: 0	1.1.1.-
ALANINE--TRNA-LIGASE-RXN	ALA-tRNAs[c] + L-ALPHA-ALANINE[c] + ATP[c] + PROTON[c] -> Charged-ALA-tRNAs[c] + PPI[c] + AMP[c]	METBUDRAFT_1541	TRNA-CHARGING-PWY	0	0	1000	0	Confidence level: 2	6.1.1.7
RXN-12709	CPD-13698[c] + NAD[c] <=> CPD-13699[c] + NADH[c] + PROTON[c]	METBUDRAFT_3643		1	-1000	1000	0	Confidence level: 2	1.1.1.35
ADENINE-DEAMINASE-RXN	ADENINE[c] + WATER[c] -> HYPOXANTHINE[c] + AMMONIA[c]	METBUDRAFT_0448	PWY-6610	0	0	1000	0	Confidence level: 2	3.5.4.2
RXN-12252	CPD-173[c] + CPD-13172[c] + PROTON[c] <=> CPD-13174[c] + WATER[c]	METBUDRAFT_0131		1	-1000	1000	0	Confidence level: 2	3.1.1.1
7KAPSYN-RXN	CPD-558[c] + L-ALPHA-ALANINE[c] + PROTON[c] -> 8-AMINO-7-OXONONANOATE[c] + CO-A[c] + CARBON-DIOXIDE[c]	METBUDRAFT_0306	PWY-6578	0	0	1000	0	Confidence level: 2	2.3.1.47
RXN-11592	23S-rRNA-pseudouridine1915[c] + S-ADENOSYLMETHIONINE[c] <=> 23S-rRNA-N3-methylpseudouridine1915[c] + ADENOSYL-HOMO-CYS[c] + PROTON[c]	METBUDRAFT_3906		1	-1000	1000	0	Confidence level: 2	2.1.1.177
4.99.1.3-RXN	CO__43__2[c] + SIROHYDROCHLORIN[c] <=> COBALT-SIROHYDROCHLORIN[c] + 2 PROTON[c]	METBUDRAFT_0731		1	-1000	1000	0	Confidence level: 2	4.99.1.3
RXN-11065	2 CPD-12259[c] + 3 WATER[c] <=> CPD-12230[c] + UNDECAPRENYL-DIPHOSPHATE[c] + 4 D-ALANINE[c] + PROTON[c]	METBUDRAFT_0530 METBUDRAFT_0871 METBUDRAFT_2388		1	-1000	1000	0	Confidence level: 2	3.4.16.4
3.5.4.27-RXN	METHENYLTETRAHYDROMETHANOPTERIN[c] + WATER[c] -> FORMYL-THMPT[c] + PROTON[c]	METBUDRAFT_1301	PWY-1723	0	0	1000	0	Confidence level: 2	3.5.4.27
2.7.7.33-RXN	CTP[c] + GLC-1-P[c] + PROTON[c] -> CDP-D-GLUCOSE[c] + PPI[c]	METBUDRAFT_4013		0	0	1000	0	Confidence level: 2	2.7.7.33
R342-RXN	CPD-688[c] + CO__43__2[c] + ATP[c] + WATER[c] -> CPD-689[c] + Pi[c] + ADP[c] + 3 PROTON[c]		P381-PWY	0	0	1000	0	Confidence level: 0	6.6.1.2
2-OCTAPRENYL-6-OHPHENOL-METHY-RXN	2-OCTAPRENYL-6-HYDROXYPHENOL[c] + S-ADENOSYLMETHIONINE[c] -> 2-OCTAPRENYL-6-METHOXYPHENOL[c] + ADENOSYL-HOMO-CYS[c] + PROTON[c]	METBUDRAFT_0508	PWY-6708	0	0	1000	0	Confidence level: 2	2.1.1.222
PALMITOTRANS-RXN	Palmitoleoyl-ACPs[c] + KDO2-LIPID-IVA[c] -> KDO2-PALMITOLEOYL-LIPID-IVA[c] + ACP[c]		KDO-NAGLIPASYN-PWY	0	0	1000	0	Confidence level: 0	2.3.1.-
4.2.1.59-RXN	3-Hydroxy-octanoyl-ACPs[c] -> 2-Octenoyl-ACPs[c] + WATER[c]		PWY-5971	0	0	1000	0	Confidence level: 0	4.2.1.59
RXN1G-479	R-3-hydroxybehenoyl-ACPs[c] <=> trans-delta2-behenoyl-ACPs[c] + WATER[c]			1	-1000	1000	0	Confidence level: 0	4.2.1.-
RXN1G-182	cis-cis-D5-23-3-hydroxyC42-2-ACPs[c] + NADP[c] <=> cis-cis-D5-23-3-oxo-C42-2-ACPs[c] + NADPH[c] + PROTON[c]	METBUDRAFT_1059 METBUDRAFT_2781 METBUDRAFT_2972		1	-1000	1000	0	Confidence level: 2	1.1.1.100
RXN-9634	R-3-hydroxystearoyl-ACPs[c] -> Octadec-2-enoyl-ACPs[c] + WATER[c]		PWY-5989	0	0	1000	0	Confidence level: 0	4.2.1.59
RXN-9531	Decanoyl-ACPs[c] + MALONYL-ACP[c] + PROTON[c] -> 3-oxo-dodecanoyl-ACPs[c] + CARBON-DIOXIDE[c] + ACP[c]		PWY-5971	0	0	1000	0	Confidence level: 0	2.3.1.41
RXN-13264	PPI[c] + AMP[c] + Dodecanoyl-ACPs[c] -> DODECANOATE[c] + ATP[c] + ACP[c]	METBUDRAFT_0347		0	0	1000	0	Confidence level: 2	6.2.1.20
RXN-11481	3-hydroxypimeloyl-ACP-methyl-esters[c] -> Enoylpimeloyl-ACP-methyl-esters[c] + WATER[c]	METBUDRAFT_1202	PWYN0B-40	0	0	1000	0	Confidence level: 2	4.2.1.59
MYRISTOYLACYLTRAN-RXN	KDO2-LAUROYL-LIPID-IVA[c] + Myristoyl-ACPs[c] -> KDO2-LIPID-A[c] + ACP[c]		KDO-NAGLIPASYN-PWY	0	0	1000	0	Confidence level: 0	2.3.1.-
2.3.1.180-RXN	ACETYL-COA[c] + MALONYL-ACP[c] + PROTON[c] -> Acetoacetyl-ACPs[c] + CO-A[c] + CARBON-DIOXIDE[c]	METBUDRAFT_1057	PWY-4381	0	0	1000	0	Confidence level: 2	2.3.1.180
THIOREDOXIN-REDUCT-NADPH-RXN	Ox-Thioredoxin[c] + NADPH[c] + PROTON[c] -> Red-Thioredoxin[c] + NADP[c]	METBUDRAFT_4479	THIOREDOX-PWY	0	0	1000	0	Confidence level: 2	1.8.1.9
RXN1G-409	cis-cis-D19-37-3-hydroxyC56-2-ACPs[c] + NADP[c] <=> cis-cis-D19-37-3-oxo-C56-2-ACPs[c] + NADPH[c] + PROTON[c]	METBUDRAFT_1059 METBUDRAFT_2781 METBUDRAFT_2972		1	-1000	1000	0	Confidence level: 2	1.1.1.100
RXN1G-1053	cis-delta19-3-hydroxyC38-ACPs[c] + NADP[c] <=> cis-delta19-3-oxo-C38-ACPs[c] + NADPH[c] + PROTON[c]	METBUDRAFT_1059 METBUDRAFT_2781 METBUDRAFT_2972		1	-1000	1000	0	Confidence level: 2	1.1.1.100
RXN-9661	Dodec-2-enoyl-ACPs[c] + NADH[c] + PROTON[c] -> Dodecanoyl-ACPs[c] + NAD[c]		PWY-5971	0	0	1000	0	Confidence level: 0	1.3.1.9
RXN-9557	R-3-hydroxy-cis-vaccenoyl-ACPs[c] <=> cis-vaccen-2-enoyl-ACPs[c] + WATER[c]	METBUDRAFT_1202		1	-1000	1000	0	Confidence level: 2	4.2.1.59
RXN-9524	3-Oxo-octanoyl-ACPs[c] + NADPH[c] + PROTON[c] -> 3-Hydroxy-octanoyl-ACPs[c] + NADP[c]	METBUDRAFT_1059 METBUDRAFT_2781 METBUDRAFT_2972	PWY-5971	0	0	1000	0	Confidence level: 2	1.1.1.100
RXN-11476	3-Ketoglutaryl-ACP-methyl-ester[c] + NADPH[c] + PROTON[c] -> 3-Hydroxyglutaryl-ACP-methyl-ester[c] + NADP[c]	METBUDRAFT_1059 METBUDRAFT_2781 METBUDRAFT_2972	PWYN0B-40	0	0	1000	0	Confidence level: 2	1.1.1.100
GDPREDUCT-RXN	Red-Thioredoxin[c] + GDP[c] -> Ox-Thioredoxin[c] + DGDP[c] + WATER[c]		PWY-6125	0	0	1000	0	Confidence level: 0	1.17.4.1
1.8.4.8-RXN	Red-Thioredoxin[c] + PAPS[c] -> Ox-Thioredoxin[c] + 3-5-ADP[c] + SO3[c] + 2 PROTON[c]	METBUDRAFT_1706	SO4ASSIM-PWY-1	0	0	1000	0	Confidence level: 2	1.8.4.8
RXNN0B-55	Enoylglutaryl-ACP-methyl-esters[c] + NADPH[c] + MALONYL-ACP[c] + 2 PROTON[c] -> 3-Ketopimeloyl-ACP-methyl-esters[c] + NADP[c] + CARBON-DIOXIDE[c] + ACP[c]		PWYN0B-40	0	0	1000	0	Confidence level: 0
RXN1G-364	cis-delta7-3-hydroxycerotoyl-ACPs[c] + NADP[c] <=> cis-delta7-3-oxo-cerotoyl-ACPs[c] + NADPH[c] + PROTON[c]	METBUDRAFT_1059 METBUDRAFT_2781 METBUDRAFT_2972		1	-1000	1000	0	Confidence level: 2	1.1.1.100
RXN0-947	Octanoyl-ACPs[c] + Lipoyl-Protein[c] -> Octanoylated-domains[c] + PROTON[c] + ACP[c]	METBUDRAFT_2391	PWY0-501	0	0	1000	0	Confidence level: 2	2.3.1.181
RXN-9658	Hex-2-enoyl-ACPs[c] + NADH[c] + PROTON[c] -> Hexanoyl-ACPs[c] + NAD[c]		PWY-5971	0	0	1000	0	Confidence level: 0	1.3.1.9
RXN-9552	R-3-hydroxypetroselinoyl-ACPs[c] + NADP[c] <=> 3-oxo-petroselinoyl-ACPs[c] + NADPH[c] + PROTON[c]	METBUDRAFT_1059 METBUDRAFT_2781 METBUDRAFT_2972		1	-1000	1000	0	Confidence level: 2	1.1.1.100
RXN-9518	NADPH[c] + PROTON[c] + 3-oxo-hexanoyl-ACPs[c] -> R-3-hydroxyhexanoyl-ACPs[c] + NADP[c]	METBUDRAFT_1059 METBUDRAFT_2781 METBUDRAFT_2972	PWY-5971	0	0	1000	0	Confidence level: 2	1.1.1.100
RXN-10658	Cis-Delta7-tetradecenoyl-ACPs[c] + MALONYL-ACP[c] + PROTON[c] -> 3-oxo-cis-D9-hexadecenoyl-ACPs[c] + CARBON-DIOXIDE[c] + ACP[c]	METBUDRAFT_0901 METBUDRAFT_1201 METBUDRAFT_2783		0	0	1000	0	Confidence level: 2	2.3.1.41
RXN1G-853	cis-cis-D11-29-3-hydroxyC48-2-ACPs[c] + NADP[c] <=> cis-cis-D11-29-3-oxo-C48-2-ACPs[c] + NADPH[c] + PROTON[c]	METBUDRAFT_1059 METBUDRAFT_2781 METBUDRAFT_2972		1	-1000	1000	0	Confidence level: 2	1.1.1.100
RXN1G-320	R-3-hydroxyarachidoyl-ACPs[c] <=> trans-delta2-arachidoyl-ACPs[c] + WATER[c]			1	-1000	1000	0	Confidence level: 0	2.3.1.-
RXN0-2144	b-Hydroxy-cis-D5-dodecenoyl-ACPs[c] <=> Trans-D3-cis-D5-dodecenoyl-ACPs[c] + WATER[c]	METBUDRAFT_1202 METBUDRAFT_2157		1	-1000	1000	0	Confidence level: 2	4.2.1.59
RXN-9654	Myristoyl-ACPs[c] + MALONYL-COA[c] + PROTON[c] <=> 3-oxo-palmitoyl-ACPs[c] + CO-A[c] + CARBON-DIOXIDE[c]	METBUDRAFT_0901 METBUDRAFT_1201 METBUDRAFT_2783		1	-1000	1000	0	Confidence level: 2	2.3.1.41
RXN-9540	3-oxo-palmitoyl-ACPs[c] + NADPH[c] + PROTON[c] -> R-3-Hydroxypalmitoyl-ACPs[c] + NADP[c]		PWY-5971	0	0	1000	0	Confidence level: 0	1.1.1.100
RXN-7719	BCAA-dehydrogenase-DH-lipoyl[c] + NAD[c] <=> BCAA-dehydrogenase-lipoyl[c] + NADH[c] + PROTON[c]	METBUDRAFT_0801 METBUDRAFT_1908		1	-1000	1000	0	Confidence level: 2	1.8.1.4
RXN-10654	Cis-Delta5-dodecenoyl-ACPs[c] + MALONYL-ACP[c] + PROTON[c] -> 3-oxo-cis-D7-tetradecenoyl-ACPs[c] + CARBON-DIOXIDE[c] + ACP[c]	METBUDRAFT_0901 METBUDRAFT_1201 METBUDRAFT_2783		0	0	1000	0	Confidence level: 2	2.3.1.41
BIOTINLIG-RXN	BCCP-monomers[c] + BIOTIN[c] + ATP[c] -> BCCP-biotin-monomers[c] + PPI[c] + AMP[c]	METBUDRAFT_0868	PWY0-1264	0	0	1000	0	Confidence level: 2	6.3.4.15
RXN1G-637	cis-cis-D11-23-3-hydroxyC42-2-ACPs[c] + NADP[c] <=> cis-cis-D11-23-3-oxo-C42-2-ACPs[c] + NADPH[c] + PROTON[c]	METBUDRAFT_1059 METBUDRAFT_2781 METBUDRAFT_2972		1	-1000	1000	0	Confidence level: 2	1.1.1.100
RXN1G-260	cis-delta13-3-hydroxylacceroyl-ACPs[c] + NADP[c] <=> cis-delta13-3-oxo-lacceroyl-ACPs[c] + NADPH[c] + PROTON[c]	METBUDRAFT_1059 METBUDRAFT_2781 METBUDRAFT_2972		1	-1000	1000	0	Confidence level: 2	1.1.1.100
RXN-9651	Octanoyl-ACPs[c] + MALONYL-COA[c] + PROTON[c] <=> 3-oxo-decanoyl-ACPs[c] + CO-A[c] + CARBON-DIOXIDE[c]	METBUDRAFT_0901 METBUDRAFT_1201 METBUDRAFT_2783		1	-1000	1000	0	Confidence level: 2	2.3.1.41
RXN-9536	3-oxo-myristoyl-ACPs[c] + NADPH[c] + PROTON[c] -> R-3-hydroxymyristoyl-ACPs[c] + NADP[c]		PWY-5971	0	0	1000	0	Confidence level: 0	1.1.1.100
RXN-5741	CPD-195[c] + ATP[c] + ACP[c] -> Octanoyl-ACPs[c] + PPI[c] + AMP[c]	METBUDRAFT_0347		0	0	1000	0	Confidence level: 2	6.2.1.20
4.2.1.61-RXN	R-3-Hydroxypalmitoyl-ACPs[c] -> 2-Hexadecenoyl-ACPs[c] + WATER[c]	METBUDRAFT_1202	PWY-5971	0	0	1000	0	Confidence level: 2	4.2.1.59
RXN1G-517	R-3-hydroxylignoceroyl-ACPs[c] <=> trans-delta2-lignoceroyl-ACPs[c] + WATER[c]			1	-1000	1000	0	Confidence level: 0	2.3.1.-
RXN1G-184	cis-cis-D17-35-3-hydroxyC54-2-ACPs[c] + NADP[c] <=> cis-cis-D17-35-3-oxo-C54-2-ACPs[c] + NADPH[c] + PROTON[c]	METBUDRAFT_1059 METBUDRAFT_2781 METBUDRAFT_2972		1	-1000	1000	0	Confidence level: 2	1.1.1.100
RXN-982	ARSENATE[c] + Red-Glutaredoxins[c] + PROTON[c] -> CPD-763[c] + Ox-Glutaredoxins[c] + WATER[c]	METBUDRAFT_0393 METBUDRAFT_4062	PWY-4621	0	0	1000	0	Confidence level: 2	1.20.4.1
RXN-9635	Octadec-2-enoyl-ACPs[c] + NADH[c] + PROTON[c] -> Stearoyl-ACPs[c] + NAD[c]	METBUDRAFT_0122	PWY-5989	0	0	1000	0	Confidence level: 2	1.3.1.9
RXN-9532	3-oxo-dodecanoyl-ACPs[c] + NADPH[c] + PROTON[c] -> R-3-hydroxydodecanoyl-ACPs[c] + NADP[c]		PWY-5971	0	0	1000	0	Confidence level: 0	1.1.1.100
RXN-13266	PPI[c] + AMP[c] + Myristoyl-ACPs[c] -> CPD-7836[c] + ATP[c] + ACP[c]			0	0	1000	0	Confidence level: 0	6.2.1.20
RXN-12365	Reduced-2-4Fe-4S-Ferredoxins[c] + NAD[c] + PROTON[c] <=> Oxidized-2-4Fe-4S-Ferredoxins[c] + NADH[c]	METBUDRAFT_0442		1	-1000	1000	0	Confidence level: 2	1.18.1.3
MYRPALMTRAN-RXN	KDO2-PALMITOLEOYL-LIPID-IVA[c] + Myristoyl-ACPs[c] -> KDO2-LIPID-IVA-COLD[c] + ACP[c]		KDO-NAGLIPASYN-PWY	0	0	1000	0	Confidence level: 0	2.3.1.-
2OXOGLUTDECARB-RXN	2-KETOGLUTARATE[c] + Oxo-glutarate-dehydrogenase-lipoyl[c] -> Oxo-glutarate-dehydro-suc-DH-lipoyl[c] + PROTON[c] + CARBON-DIOXIDE[c]	METBUDRAFT_0803	TCA, PWY-5084	0	0	1000	0	Confidence level: 2	1.2.4.2
UDPHYDROXYMYRGLUCOSAMNACETYLTRANS-RXN	R-3-hydroxymyristoyl-ACPs[c] + UDP-OHMYR-GLUCOSAMINE[c] -> OH-MYRISTOYL[c] + PROTON[c] + ACP[c]	METBUDRAFT_4352	NAGLIPASYN-PWY	0	0	1000	0	Confidence level: 2	2.3.1.191
RXN1G-460	CPD-9965[c] + MALONYL-ACP[c] + PROTON[c] -> 3-oxo-behenoyl-ACPs[c] + CO-A[c] + CARBON-DIOXIDE[c]	METBUDRAFT_0901 METBUDRAFT_1201 METBUDRAFT_2783		0	0	1000	0	Confidence level: 2	2.3.1.41
RXN1G-1247	cis-cis-D15-33-3-hydroxyC52-2-ACPs[c] + NADP[c] <=> cis-cis-D15-33-3-oxo-C52-2-ACPs[c] + NADPH[c] + PROTON[c]	METBUDRAFT_1059 METBUDRAFT_2781 METBUDRAFT_2972		1	-1000	1000	0	Confidence level: 2	1.1.1.100
RXN-9662	Tetradec-2-enoyl-ACPs[c] + NADH[c] + PROTON[c] -> Myristoyl-ACPs[c] + NAD[c]		PWY-5971	0	0	1000	0	Confidence level: 0	1.3.1.9
RXN-9632	Palmitoyl-ACPs[c] + MALONYL-COA[c] + PROTON[c] -> 3-oxo-stearoyl-ACPs[c] + CO-A[c] + CARBON-DIOXIDE[c]	METBUDRAFT_0901 METBUDRAFT_1201 METBUDRAFT_2783	PWY-5989	0	0	1000	0	Confidence level: 2	2.3.1.41
RXN-9527	Octanoyl-ACPs[c] + MALONYL-ACP[c] + PROTON[c] -> 3-oxo-decanoyl-ACPs[c] + CARBON-DIOXIDE[c] + ACP[c]		PWY-5971	0	0	1000	0	Confidence level: 0	2.3.1.41
RXN-11477	3-Hydroxyglutaryl-ACP-methyl-ester[c] -> Enoylglutaryl-ACP-methyl-esters[c] + WATER[c]	METBUDRAFT_1202	PWYN0B-40	0	0	1000	0	Confidence level: 2	4.2.1.59
LAUROYLACYLTRAN-RXN	KDO2-LIPID-IVA[c] + Dodecanoyl-ACPs[c] -> KDO2-LAUROYL-LIPID-IVA[c] + ACP[c]		KDO-NAGLIPASYN-PWY	0	0	1000	0	Confidence level: 0	2.3.1.-
2-OXOBUTYRATE-SYNTHASE-RXN	2-OXOBUTANOATE[c] + Oxidized-ferredoxins[c] + CO-A[c] <=> PROPIONYL-COA[c] + Reduced-ferredoxins[c] + PROTON[c] + CARBON-DIOXIDE[c]	METBUDRAFT_3580		1	-1000	1000	0	Confidence level: 2	1.2.7.2
RXNN0B-82	Enoylpimeloyl-ACP-methyl-esters[c] + CO-A[c] + WATER[c] + PROTON[c] -> CPD-558[c] + METOH[c] + ACP[c]		PWYN0B-40	0	0	1000	0	Confidence level: 0
RXN1G-384	cis-cis-D7-25-3-hydroxyC44-2-ACPs[c] + NADP[c] <=> cis-cis-D7-25-3-oxo-C44-2-ACPs[c] + NADPH[c] + PROTON[c]	METBUDRAFT_1059 METBUDRAFT_2781 METBUDRAFT_2972		1	-1000	1000	0	Confidence level: 2	1.1.1.100
RXN0-949	2 CPD-7046[c] + Octanoylated-domains[c] + 2 S-ADENOSYLMETHIONINE[c] -> Lipoyl-Protein-N6-lipoyllysine[c] + 2 CH33ADO[c] + 2 MET[c]	METBUDRAFT_2392	PWY0-501	0	0	1000	0	Confidence level: 2	2.8.1.8
RXN-9659	2-Octenoyl-ACPs[c] + NADH[c] + PROTON[c] -> Octanoyl-ACPs[c] + NAD[c]		PWY-5971	0	0	1000	0	Confidence level: 0	1.3.1.9
RXN-9553	R-3-hydroxypetroselinoyl-ACPs[c] <=> Petrosel-2-enoyl-ACPs[c] + WATER[c]			1	-1000	1000	0	Confidence level: 0	4.2.1.-
RXN-9520	R-3-hydroxyhexanoyl-ACPs[c] -> Hex-2-enoyl-ACPs[c] + WATER[c]		PWY-5971	0	0	1000	0	Confidence level: 0	4.2.1.59
RXN-10660	3-hydroxy-cis-D9-hexaecenoyl-ACPs[c] <=> Trans-D3-cis-D9-hexadecenoyl-ACPs[c] + WATER[c]	METBUDRAFT_1202		1	-1000	1000	0	Confidence level: 2	4.2.1.59
FLAVONADPREDUCT-RXN	Oxidized-flavodoxins[c] + NADPH[c] + PROTON[c] -> Reduced-flavodoxins[c] + NADP[c]	METBUDRAFT_3574		0	0	1000	0	Confidence level: 2	1.18.1.2
1.18.1.2-RXN	2 Oxidized-ferredoxins[c] + NADPH[c] -> 2 Reduced-ferredoxins[c] + NADP[c] + PROTON[c]	METBUDRAFT_3574		0	0	1000	0	Confidence level: 2	1.18.1.2
RXN1G-881	cis-delta17-3-hydroxyC36-ACPs[c] + NADP[c] <=> cis-delta17-3-oxo-C36-ACPs[c] + NADPH[c] + PROTON[c]			1	-1000	1000	0	Confidence level: 0	1.1.1.100
RXN1G-358	cis-delta15-3-hydroxygheddoyl-ACPs[c] + NADP[c] <=> cis-delta15-3-oxo-gheddoyl-ACPs[c] + NADPH[c] + PROTON[c]	METBUDRAFT_1059 METBUDRAFT_2781 METBUDRAFT_2972		1	-1000	1000	0	Confidence level: 2	1.1.1.100
RXN0-5055	Carboxybiotin-BCCP[c] + ACETYL-COA[c] -> BCCP-dimers[c] + MALONYL-COA[c]	METBUDRAFT_0494 METBUDRAFT_0593 METBUDRAFT_3928	PWY0-1264	0	0	1000	0	Confidence level: 2	6.4.1.2
RXN-9655	Beta-hydroxydecanoyl-ACPs[c] -> Trans-D2-decenoyl-ACPs[c] + WATER[c]		PWY-5971	0	0	1000	0	Confidence level: 0	4.2.1.59
RXN-9548	Stearoyl-ACPs[c] + WATER[c] -> STEARIC_ACID[c] + PROTON[c] + ACP[c]		PWY-5989	0	0	1000	0	Confidence level: 0	3.1.2.14
RXN-9514	Acetoacetyl-ACPs[c] + NADPH[c] + PROTON[c] -> Beta-3-hydroxybutyryl-ACPs[c] + NADP[c]	METBUDRAFT_1059 METBUDRAFT_2781 METBUDRAFT_2972	PWY-5971	0	0	1000	0	Confidence level: 2	1.1.1.100
RXN-10655	NADP[c] + 3-hydroxy-cis-D7-tetraecenoyl-ACPs[c] <=> 3-oxo-cis-D7-tetradecenoyl-ACPs[c] + NADPH[c] + PROTON[c]	METBUDRAFT_1059 METBUDRAFT_2781 METBUDRAFT_2972		1	-1000	1000	0	Confidence level: 2	1.1.1.100
CDPREDUCT-RXN	Red-Thioredoxin[c] + CDP[c] -> Ox-Thioredoxin[c] + DCDP[c] + WATER[c]	METBUDRAFT_3386	PWY0-166	0	0	1000	0	Confidence level: 2	1.17.4.1
RXN1G-717	cis-cis-D17-29-3-hydroxyC48-2-ACPs[c] + NADP[c] <=> cis-cis-D17-29-3-oxo-C48-2-ACPs[c] + NADPH[c] + PROTON[c]	METBUDRAFT_1059 METBUDRAFT_2781 METBUDRAFT_2972		1	-1000	1000	0	Confidence level: 2	1.1.1.100
RXN1G-262	cis-cis-D7-19-3-hydroxyC38-2-ACPs[c] + NADP[c] <=> cis-cis-D7-19-3-oxo-C38-2-ACPs[c] + NADPH[c] + PROTON[c]	METBUDRAFT_1059 METBUDRAFT_2781 METBUDRAFT_2972		1	-1000	1000	0	Confidence level: 2	1.1.1.100
RXN0-1147	Oxo-glutarate-dehydro-suc-DH-lipoyl[c] + CO-A[c] -> SUC-COA[c] + Oxo-glutarate-dehydrogenase-DH-lipoyl[c]	METBUDRAFT_0802	TCA, PWY-5084	0	0	1000	0	Confidence level: 2	2.3.1.61
RXN-9652	Decanoyl-ACPs[c] + MALONYL-COA[c] + PROTON[c] <=> 3-oxo-dodecanoyl-ACPs[c] + CO-A[c] + CARBON-DIOXIDE[c]	METBUDRAFT_0901 METBUDRAFT_1201 METBUDRAFT_2783		1	-1000	1000	0	Confidence level: 2	2.3.1.41
RXN-9537	R-3-hydroxymyristoyl-ACPs[c] -> Tetradec-2-enoyl-ACPs[c] + WATER[c]	METBUDRAFT_1202	PWY-5971	0	0	1000	0	Confidence level: 2	4.2.1.59
PROTEIN-TYROSINE-PHOSPHATASE-RXN	Protein-tyrosine-phosphates[c] + WATER[c] <=> Protein-Tyrosines[c] + Pi[c]	METBUDRAFT_1141		1	-1000	1000	0	Confidence level: 2	3.1.3.48
ADPREDUCT-RXN	Red-Thioredoxin[c] + ADP[c] -> Ox-Thioredoxin[c] + DADP[c] + WATER[c]	METBUDRAFT_3386	PWY-6126	0	0	1000	0	Confidence level: 2	1.17.4.1
RXN1G-613	cis-cis-D9-27-3-hydroxyC46-2-ACPs[c] + NADP[c] <=> cis-cis-D9-27-3-oxo-C46-2-ACPs[c] + NADPH[c] + PROTON[c]	METBUDRAFT_1059 METBUDRAFT_2781 METBUDRAFT_2972		1	-1000	1000	0	Confidence level: 2	1.1.1.100
RXN1G-240	cis-delta9-3-hydroxymontanoyl-ACPs[c] + NADP[c] <=> cis-delta9-3-oxo-montanoyl-ACPs[c] + NADPH[c] + PROTON[c]			1	-1000	1000	0	Confidence level: 0	1.1.1.100
RXN0-1132	Pyruvate-dehydrogenase-lipoate[c] + NADH[c] + PROTON[c] -> Pyruvate-dehydrogenase-dihydrolipoate[c] + NAD[c]	METBUDRAFT_0801 METBUDRAFT_1908	PYRUVDEHYD-PWY	0	0	1000	0	Confidence level: 2	1.8.1.4
RXN-9648	MALONYL-COA[c] + Butanoyl-ACPs[c] + PROTON[c] <=> CO-A[c] + 3-oxo-hexanoyl-ACPs[c] + CARBON-DIOXIDE[c]	METBUDRAFT_0901 METBUDRAFT_1201 METBUDRAFT_2783		1	-1000	1000	0	Confidence level: 2	2.3.1.41
RXN-9533	R-3-hydroxydodecanoyl-ACPs[c] -> Dodec-2-enoyl-ACPs[c] + WATER[c]	METBUDRAFT_1202	PWY-5971	0	0	1000	0	Confidence level: 2	4.2.1.59
RXN-13267	Palmitoyl-ACPs[c] + PPI[c] + AMP[c] -> PALMITATE[c] + ATP[c] + ACP[c]			0	0	1000	0	Confidence level: 0	6.2.1.20
NITROGENASE-RXN	NITROGEN-MOLECULE[c] + 16 ATP[c] + 4 NADPH[c] + 16 WATER[c] -> 2 AMMONIA[c] + 16 Pi[c] + 16 ADP[c] + 4 NADP[c] + 14 PROTON[c]	METBUDRAFT_4151 METBUDRAFT_4152 METBUDRAFT_4153	N2FIX-PWY	0	0	1000	0	Confidence level: 2	1.18.6.1
4.2.1.58-RXN	Beta-3-hydroxybutyryl-ACPs[c] -> Crotonyl-ACPs[c] + WATER[c]		PWY-5971	0	0	1000	0	Confidence level: 0	4.2.1.59
UDPNACETYLGLUCOSAMACYLTRANS-RXN	R-3-hydroxymyristoyl-ACPs[c] + UDP-N-ACETYL-D-GLUCOSAMINE[c] -> UDP-OHMYR-ACETYLGLUCOSAMINE[c] + ACP[c]	METBUDRAFT_2156 METBUDRAFT_4046	NAGLIPASYN-PWY	0	0	1000	0	Confidence level: 2	2.3.1.129
RXN1G-469	R-3-hydroxybehenoyl-ACPs[c] + NADP[c] <=> 3-oxo-behenoyl-ACPs[c] + NADPH[c] + PROTON[c]			1	-1000	1000	0	Confidence level: 0	1.1.1.100
RXN1G-163	cis-delta11-3-hydroxymelissoyl-ACPs[c] + NADP[c] <=> cis-delta11-3-oxo-melissoyl-ACPs[c] + NADPH[c] + PROTON[c]			1	-1000	1000	0	Confidence level: 0	1.1.1.100
RXN-9663	2-Hexadecenoyl-ACPs[c] + NADH[c] + PROTON[c] -> Palmitoyl-ACPs[c] + NAD[c]		PWY-5971	0	0	1000	0	Confidence level: 0	1.3.1.9
RXN-9633	3-oxo-stearoyl-ACPs[c] + NADPH[c] + PROTON[c] -> R-3-hydroxystearoyl-ACPs[c] + NADP[c]		PWY-5989	0	0	1000	0	Confidence level: 0	1.1.1.100
RXN-9528	3-oxo-decanoyl-ACPs[c] + NADPH[c] + PROTON[c] -> Beta-hydroxydecanoyl-ACPs[c] + NADP[c]		PWY-5971	0	0	1000	0	Confidence level: 0	1.1.1.100
RXN-13008	3-HYDROXY-DOCOSAPENTAENOYL-ACP[c] + NADP[c] <=> 3-OXO-EICOSAPENTAENOYL-ACP[c] + NADPH[c] + PROTON[c]	METBUDRAFT_1059 METBUDRAFT_2781 METBUDRAFT_2972		1	-1000	1000	0	Confidence level: 2	1.1.1.100
RXN-11480	3-Ketopimeloyl-ACP-methyl-esters[c] + NADPH[c] + PROTON[c] -> 3-hydroxypimeloyl-ACP-methyl-esters[c] + NADP[c]		PWYN0B-40	0	0	1000	0	Confidence level: 0	1.1.1.100
MALONYL-COA-ACP-TRANSACYL-RXN	MALONYL-COA[c] + ACP[c] -> CO-A[c] + MALONYL-ACP[c] + PROTON[c]	METBUDRAFT_1058	PWY-4381	0	0	1000	0	Confidence level: 2	2.3.1.39
2.3.1.179-RXN	Palmitoleoyl-ACPs[c] + MALONYL-ACP[c] + PROTON[c] -> 3-oxo-cis-vaccenoyl-ACPs[c] + CARBON-DIOXIDE[c] + ACP[c]	METBUDRAFT_1061 METBUDRAFT_2780		0	0	1000	0	Confidence level: 2	2.3.1.179
RXNN0B-86	Unsulfurated-Sulfur-Acceptors[c] + HS[c] -> Sulfurated-Sulfur-Acceptors[c] + PROTON[c]			0	0	1000	0	Confidence level: 0
RXN1G-408	cis-cis-D5-17-3-hydroxyC36-2-ACPs[c] + NADP[c] <=> cis-cis-D5-17-3-oxo-C36-2-ACPs[c] + NADPH[c] + PROTON[c]	METBUDRAFT_1059 METBUDRAFT_2781 METBUDRAFT_2972		1	-1000	1000	0	Confidence level: 2	1.1.1.100
RXN1G-1050	cis-cis-D13-31-3-hydroxyC50-2-ACPs[c] + NADP[c] <=> cis-cis-D13-31-3-oxo-C50-2-ACPs[c] + NADPH[c] + PROTON[c]	METBUDRAFT_1059 METBUDRAFT_2781 METBUDRAFT_2972		1	-1000	1000	0	Confidence level: 2	1.1.1.100
RXN-9660	Trans-D2-decenoyl-ACPs[c] + NADH[c] + PROTON[c] -> Decanoyl-ACPs[c] + NAD[c]		PWY-5971	0	0	1000	0	Confidence level: 0	1.3.1.9
RXN-9556	R-3-hydroxy-cis-vaccenoyl-ACPs[c] + NADP[c] <=> 3-oxo-cis-vaccenoyl-ACPs[c] + NADPH[c] + PROTON[c]	METBUDRAFT_1059 METBUDRAFT_2781 METBUDRAFT_2972		1	-1000	1000	0	Confidence level: 2	1.1.1.100
RXN-9523	Hexanoyl-ACPs[c] + MALONYL-ACP[c] + PROTON[c] -> 3-Oxo-octanoyl-ACPs[c] + CARBON-DIOXIDE[c] + ACP[c]		PWY-5971	0	0	1000	0	Confidence level: 0	2.3.1.41
RXN-11474	CPD-12454[c] + MALONYL-ACP[c] + PROTON[c] -> 3-Ketoglutaryl-ACP-methyl-ester[c] + CO-A[c] + CARBON-DIOXIDE[c]	METBUDRAFT_1057	PWYN0B-40	0	0	1000	0	Confidence level: 2	2.3.1.180
1.8.1.4-RXN	Dihydro-Lipoyl-Proteins[c] + NAD[c] <=> Lipoyl-Protein-N6-lipoyllysine[c] + NADH[c]	METBUDRAFT_0801 METBUDRAFT_1908		1	-1000	1000	0	Confidence level: 2	1.8.1.4
RXN1G-951	cis-cis-D19-31-3-hydroxyC50-2-ACPs[c] + NADP[c] <=> cis-cis-D19-31-3-oxo-C50-2-ACPs[c] + NADPH[c] + PROTON[c]	METBUDRAFT_1059 METBUDRAFT_2781 METBUDRAFT_2972		1	-1000	1000	0	Confidence level: 2	1.1.1.100
RXN1G-363	R-3-hydroxybehenoyl-ACPs[c] <=> trans-delta2-behenoyl-ACPs[c] + WATER[c]			1	-1000	1000	0	Confidence level: 0	4.2.1.-
RXN0-6705	Palmitoyl-ACPs[c] + 1-PALMITOYLGLYCEROL-3-PHOSPHATE[c] -> CPD0-1422[c] + ACP[c]	METBUDRAFT_1123 METBUDRAFT_2422		0	0	1000	0	Confidence level: 2	2.3.1.51
RXN-9657	Crotonyl-ACPs[c] + NADH[c] + PROTON[c] -> NAD[c] + Butanoyl-ACPs[c]	METBUDRAFT_0122	PWY-5971	0	0	1000	0	Confidence level: 2	1.3.1.9
RXN-9549	Palmitoyl-ACPs[c] + WATER[c] -> PALMITATE[c] + PROTON[c] + ACP[c]		PWY-5971	0	0	1000	0	Confidence level: 0	3.1.2.14
